# Supplementary material for: 2,2′-Bipyridine derived doubly B ← N fused bisphosphine-chalcogenides, [C5H3N(BF2){NCH2P(E)Ph2}]2 (E = O, S, Se): tuning of structural features and photophysical studies
Source: Royal Society of Chemistry journal article supplement (doi:10.1039/d2dt00287f), 2022-01-01
Supplement: d2dt00287f1.pdf [file d2dt00287f1.pdf]

# Supporting Information

## **2,2'-Bipyridine derived doubly B←N fused bisphosphine-chalcogenides, [C<sub>5</sub>H<sub>3</sub>N(BF<sub>2</sub>){NCH<sub>2</sub>P(E)Ph<sub>2</sub>}]<sub>2</sub> (E = O, S, Se): tuning of structural features and photophysical studies**

Dipanjan Mondal,<sup>a</sup> Gopa Sardar,<sup>b</sup> Dinesh Kabra<sup>b</sup> and Maravanji S. Balakrishna<sup>\*a</sup>

<sup>a</sup>*Phosphorus Laboratory, Department of Chemistry, Indian Institute of Technology Bombay, Powai, Mumbai 400076, India.*

<sup>b</sup>*Department of Physics, Indian Institute of Technology Bombay, Mumbai 400076, India.*

---

\*Author to whom correspondence should be addressed. E-mail: krishna@chem.iitb.ac.in, msb\_krishna@iitb.ac.in (M. S. Balakrishna); Fax: +91-22-5172-3480/2576-7152.

## Table of content

|                                                                                                                 |         |
|-----------------------------------------------------------------------------------------------------------------|---------|
| Crystal structure determination of compounds <b>1-7</b>                                                         | S2      |
| Crystallographic information for compounds <b>1-7</b>                                                           | S3-S4   |
| Intermolecular interactions and dihedral angles of compound <b>1-7</b>                                          | S5-S14  |
| Intramolecular F...H interaction                                                                                | S15-S17 |
| UV-vis and emission spectra of compound <b>1-7</b>                                                              | S17-S19 |
| Molecular orbitals and TD-DFT calculations                                                                      | S20-S23 |
| Selected bond length and bond angles of <b>5-7</b> obtained from X-ray diffraction analysis and DFT calculation | S24     |
| OLED fabrication and characterization                                                                           | S25     |
| Spectral data for isolated compounds                                                                            | S26     |
| Optimized cartesian coordinates of compound <b>5-7</b>                                                          | S42     |
| References                                                                                                      | S56     |

## Crystal Structure Determination of Compounds 1-7.

Single crystals of all compounds were mounted on a Cryoloop with a drop of Paratone oil and positioned in the cold nitrogen stream on a Rigaku Saturn724+ (2x2 bin mode) diffractometer. The data collections were performed at 150 K using a graphite monochromated Mo-K $\alpha$  ( $\lambda = 0.71073$ ) radiation source for compounds **1-7**, and a Cu-K $\alpha$  ( $\lambda = 1.54184$ ) radiation source was used for **6**·CH<sub>2</sub>Cl<sub>2</sub> with the  $\omega$ -scan technique. The data were reduced using CrysAlisPro Red 171.41\_64.93a software. The structures were solved using Olex2<sup>1</sup> with the ShelXT<sup>2</sup> structure solution program using intrinsic phasing and refined with the SHELXL<sup>3</sup> refinement package using least-squares minimization. All non-hydrogen atoms were refined anisotropically. Hydrogen atoms were placed in calculated positions and included as riding contributions with isotropic displacement parameters tied to those of the attached non-hydrogen atoms. In compound **5** the disordered solvent molecule could not be recognized or modelled to a known solvent; hence, it was SQUEEZED using PLATON.<sup>4</sup> The results indicated 93 electrons and a volume of 316 Å<sup>3</sup> for **5**. The given chemical formula and other crystal data do not take into account the unknown solvent molecule(s). The reflections with error/esd more than 10 were excluded in order to avoid problems related to better refinement of the data. The data completeness is more than 99.8% in most of the cases, which is enough to guarantee a very good refinement of data. The details of X-ray structural determinations are given in Tables S1 and S2. All types of interaction images are visualised by Mercury 2020.3.0 software and all dihedral angles are visualised by Diamond 3.2 software.

**Table S1** Crystallography details.

|                                          | <b>1</b>                                                      | <b>2</b>                                                                     | <b>3</b>                                                                        | <b>4</b>                                                                         |
|------------------------------------------|---------------------------------------------------------------|------------------------------------------------------------------------------|---------------------------------------------------------------------------------|----------------------------------------------------------------------------------|
| Empirical formula                        | C <sub>36</sub> H <sub>32</sub> N <sub>4</sub> P <sub>2</sub> | C <sub>36</sub> H <sub>32</sub> N <sub>4</sub> O <sub>2</sub> P <sub>2</sub> | C <sub>144</sub> H <sub>128</sub> N <sub>16</sub> P <sub>8</sub> S <sub>8</sub> | C <sub>144</sub> H <sub>128</sub> N <sub>16</sub> P <sub>8</sub> Se <sub>8</sub> |
| Formula weight                           | 582.59                                                        | 614.59                                                                       | 2586.86                                                                         | 2962.06                                                                          |
| Temperature (K)                          | 150.00                                                        | 150.00                                                                       | 150                                                                             | 150.00                                                                           |
| Crystal system                           | triclinic                                                     | monoclinic                                                                   | monoclinic                                                                      | monoclinic                                                                       |
| Space group                              | P-1                                                           | P2 <sub>1</sub> /c                                                           | P2 <sub>1</sub>                                                                 | P2 <sub>1</sub>                                                                  |
| a, Å                                     | 8.9408(5)                                                     | 19.2473(6)                                                                   | 20.1925(8)                                                                      | 20.4030(6)                                                                       |
| b, Å                                     | 9.5762(5)                                                     | 14.8930(5)                                                                   | 18.0964(4)                                                                      | 18.0437(4)                                                                       |
| c, Å                                     | 10.2682(6)                                                    | 10.3914(4)                                                                   | 20.5065(7)                                                                      | 20.5579(5)                                                                       |
| α, °                                     | 62.279(5)                                                     | 90                                                                           | 90                                                                              | 90                                                                               |
| β, °                                     | 74.450(5)                                                     | 90.335(3)                                                                    | 118.817(5)                                                                      | 117.871(3)                                                                       |
| γ, °                                     | 81.103(4)                                                     | 90                                                                           | 90                                                                              | 90                                                                               |
| V, Å <sup>3</sup>                        | 749.30(8)                                                     | 2978.64(18)                                                                  | 6565.4(5)                                                                       | 6690.4(3)                                                                        |
| Z                                        | 1                                                             | 4                                                                            | 2                                                                               | 2                                                                                |
| ρ <sub>calc.</sub> (g cm <sup>-3</sup> ) | 1.291                                                         | 1.371                                                                        | 1.309                                                                           | 1.470                                                                            |
| M (Mo K <sub>α</sub> ), mm <sup>-1</sup> | 0.178                                                         | 0.188                                                                        | 0.292                                                                           | 2.338                                                                            |
| F(000)                                   | 306.0                                                         | 1288.0                                                                       | 2704.0                                                                          | 2992.0                                                                           |
| Crystal size (mm <sup>3</sup> )          | 0.275 × 0.129 × 0.124                                         | 0.156 × 0.089 × 0.043                                                        | 0.294 × 0.152 × 0.065                                                           | 0.38 × 0.161 × 0.083                                                             |
| 2θ range, °                              | 4.598 to 49.998                                               | 4.232 to 53.998                                                              | 3.22 to 50                                                                      | 3.238 to 50                                                                      |
| Reflections collected                    | 6241                                                          | 15831                                                                        | 68679                                                                           | 68419                                                                            |
| Independent reflections                  | 2628 [R <sub>int</sub> = 0.0328]                              | 6484 [R <sub>int</sub> = 0.0397]                                             | 22464 [R <sub>int</sub> = 0.0910]                                               | 22821 [R <sub>int</sub> = 0.0608]                                                |
| Goodness-of-fit on F <sup>2</sup>        | 1.105                                                         | 1.030                                                                        | 1.048                                                                           | 1.052                                                                            |
| R <sub>I</sub>                           | 0.0370                                                        | 0.0494                                                                       | 0.0604                                                                          | 0.0434                                                                           |
| wR <sub>2</sub>                          | 0.0938                                                        | 0.1233                                                                       | 0.1305                                                                          | 0.0977                                                                           |

**Table S2** Crystallography details.

|                                          | <b>5</b>                                                                                                   | <b>6</b>                                                                                                   | <b>6·CH<sub>2</sub>Cl<sub>2</sub></b>                                                                                      | <b>7</b>                                                                                                    |
|------------------------------------------|------------------------------------------------------------------------------------------------------------|------------------------------------------------------------------------------------------------------------|----------------------------------------------------------------------------------------------------------------------------|-------------------------------------------------------------------------------------------------------------|
| Empirical formula                        | C <sub>36</sub> H <sub>30</sub> B <sub>2</sub> F <sub>4</sub> N <sub>4</sub> O <sub>2</sub> P <sub>2</sub> | C <sub>36</sub> H <sub>30</sub> B <sub>2</sub> F <sub>4</sub> N <sub>4</sub> P <sub>2</sub> S <sub>2</sub> | C <sub>37</sub> H <sub>32</sub> B <sub>2</sub> Cl <sub>2</sub> F <sub>4</sub> N <sub>4</sub> P <sub>2</sub> S <sub>2</sub> | C <sub>36</sub> H <sub>30</sub> B <sub>2</sub> F <sub>4</sub> N <sub>4</sub> P <sub>2</sub> Se <sub>2</sub> |
| Formula weight                           | 710.20                                                                                                     | 742.32                                                                                                     | 827.24                                                                                                                     | 836.12                                                                                                      |
| Temperature (K)                          | 150.00                                                                                                     | 150.00                                                                                                     | 150.00                                                                                                                     | 150.00                                                                                                      |
| Crystal system                           | triclinic                                                                                                  | triclinic                                                                                                  | triclinic                                                                                                                  | orthorhombic                                                                                                |
| Space group                              | P-1                                                                                                        | P-1                                                                                                        | P-1                                                                                                                        | Pca2 <sub>1</sub>                                                                                           |
| a, Å                                     | 12.2600(5)                                                                                                 | 8.8004(3)                                                                                                  | 9.3602(7)                                                                                                                  | 25.0141(6)                                                                                                  |
| b, Å                                     | 12.3283(5)                                                                                                 | 13.4350(5)                                                                                                 | 13.5014(9)                                                                                                                 | 16.0868(3)                                                                                                  |
| c, Å                                     | 14.7477(6)                                                                                                 | 15.5523(4)                                                                                                 | 16.0901(16)                                                                                                                | 17.0784(4)                                                                                                  |
| α, °                                     | 113.820(4)                                                                                                 | 108.367(3)                                                                                                 | 108.010(7)                                                                                                                 | 90                                                                                                          |
| β, °                                     | 90.964(3)                                                                                                  | 96.762(3)                                                                                                  | 103.978(7)                                                                                                                 | 90                                                                                                          |
| γ, °                                     | 112.284(4)                                                                                                 | 90.049(3)                                                                                                  | 92.449(6)                                                                                                                  | 90                                                                                                          |
| V, Å <sup>3</sup>                        | 1848.43(15)                                                                                                | 1731.58(10)                                                                                                | 1861.3(3)                                                                                                                  | 6872.3(3)                                                                                                   |
| Z                                        | 2                                                                                                          | 2                                                                                                          | 2                                                                                                                          | 8                                                                                                           |
| ρ <sub>calc.</sub> (g cm <sup>-3</sup> ) | 1.276                                                                                                      | 1.424                                                                                                      | 1.476                                                                                                                      | 1.616                                                                                                       |
| M (Mo Kα), mm <sup>-1</sup>              | 0.175                                                                                                      | 0.302                                                                                                      | 3.900                                                                                                                      | 2.301                                                                                                       |
| F(000)                                   | 732.0                                                                                                      | 764.0                                                                                                      | 848.0                                                                                                                      | 3344.0                                                                                                      |
| Crystal size (mm <sup>3</sup> )          | 0.245 × 0.085 × 0.061                                                                                      | 0.165 × 0.113 × 0.098                                                                                      | 0.103 × 0.098 × 0.02                                                                                                       | 0.295 × 0.28 × 0.175                                                                                        |
| 2θ range, °                              | 4.486 to 50                                                                                                | 4.664 to 49.998                                                                                            | 5.996 to 137.992                                                                                                           | 4.766 to 49.998                                                                                             |
| Reflections collected                    | 29048                                                                                                      | 24915                                                                                                      | 23924                                                                                                                      | 79486                                                                                                       |
| Independent reflections                  | 6502 [R <sub>int</sub> = 0.0840]                                                                           | 6106 [R <sub>int</sub> = 0.0652]                                                                           | 6771 [R <sub>int</sub> = 0.1264]                                                                                           | 12071 [R <sub>int</sub> = 0.0823]                                                                           |
| Goodness-of-fit on F <sup>2</sup>        | 1.024                                                                                                      | 1.047                                                                                                      | 1.017                                                                                                                      | 1.039                                                                                                       |
| R <sub>1</sub>                           | 0.0585                                                                                                     | 0.0460                                                                                                     | 0.1064                                                                                                                     | 0.0419                                                                                                      |
| wR <sub>2</sub>                          | 0.1544                                                                                                     | 0.1086                                                                                                     | 0.3294                                                                                                                     | 0.0990                                                                                                      |

**Table S3** Important bond lengths and bond angles of compounds **1-4**

| Selected bond distances (Å) |            |            |                  |                              |                               |
|-----------------------------|------------|------------|------------------|------------------------------|-------------------------------|
|                             | <b>1</b>   |            | <b>2 (E = O)</b> | <b>3 (E = S)<sup>a</sup></b> | <b>4 (E = Se)<sup>a</sup></b> |
| C1–C1'                      | 1.486(3)   | C1–C6      | 1.490(3)         | 1.475(8)                     | 1.489(8)                      |
| C6–N2                       | 1.449(2)   | C11–N3     | 1.452(3)         | 1.438(8)                     | 1.440(8)                      |
|                             |            | C24–N4     | 1.444(2)         | 1.438(8)                     | 1.454(8)                      |
| P1–C6                       | 1.8502(17) | P1–C11     | 1.821(2)         | 1.824(6)                     | 1.824(6)                      |
|                             |            | P2–C24     | 1.808(2)         | 1.832(6)                     | 1.820(6)                      |
|                             |            | P1–E1      | 1.4842(15)       | 1.951(2)                     | 2.1039(19)                    |
|                             |            | P2–E2      | 1.4876(15)       | 1.950(2)                     | 2.0995(18)                    |
| N2–H2...N1'                 | 1.967      | N3–H3...N2 | 1.960            | 2.068                        | 2.033                         |
|                             |            | N4–H4...N1 | 1.983            | 2.104                        | 2.033                         |
| Selected bond angles (deg.) |            |            |                  |                              |                               |
| N2–C6–P1                    | 111.03(11) | N3–C11–P1  | 107.85(15)       | 109.5(4)                     | 108.7(4)                      |
|                             |            | N4–C24–P2  | 109.86(14)       | 107.6(4)                     | 109.7(4)                      |
|                             |            | E1–P1–C11  | 112.78(10)       | 111.2(2)                     | 110.4(2)                      |
|                             |            | E2–P2–C24  | 113.22(9)        | 110.6(2)                     | 112.6(2)                      |
| N2–H2...N1'                 | 132.2      | N3–H3...N2 | 132.2            | 127.6                        | 127.9                         |
|                             |            | N4–H4...N1 | 133.1            | 125.8                        | 128.5                         |
| $\Delta^b$                  |            |            | 13.41            | 26.21                        | 22.35                         |

<sup>a</sup> For compounds **3** and **4** only one molecule is considered from the asymmetric unit cell. <sup>b</sup> dihedral angle measured between the two mean planes: *plane 1* contains N1-C1-C2-N3 and *plane 2* contains N2-C6-C7-N4 atoms, respectively.

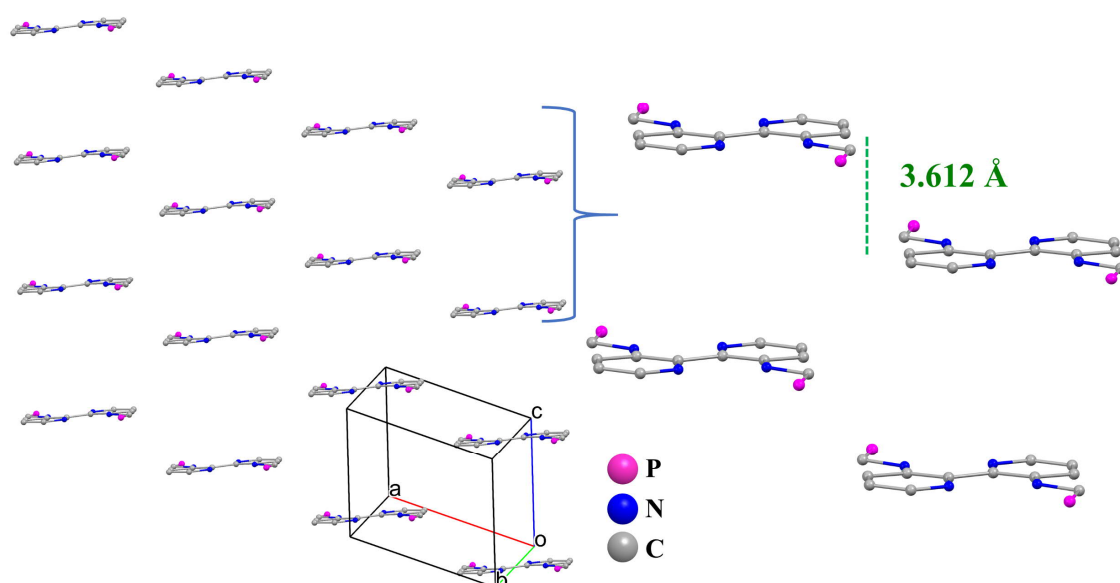**Fig. S1** Stair case stacking of bisphosphine ligand **1**.

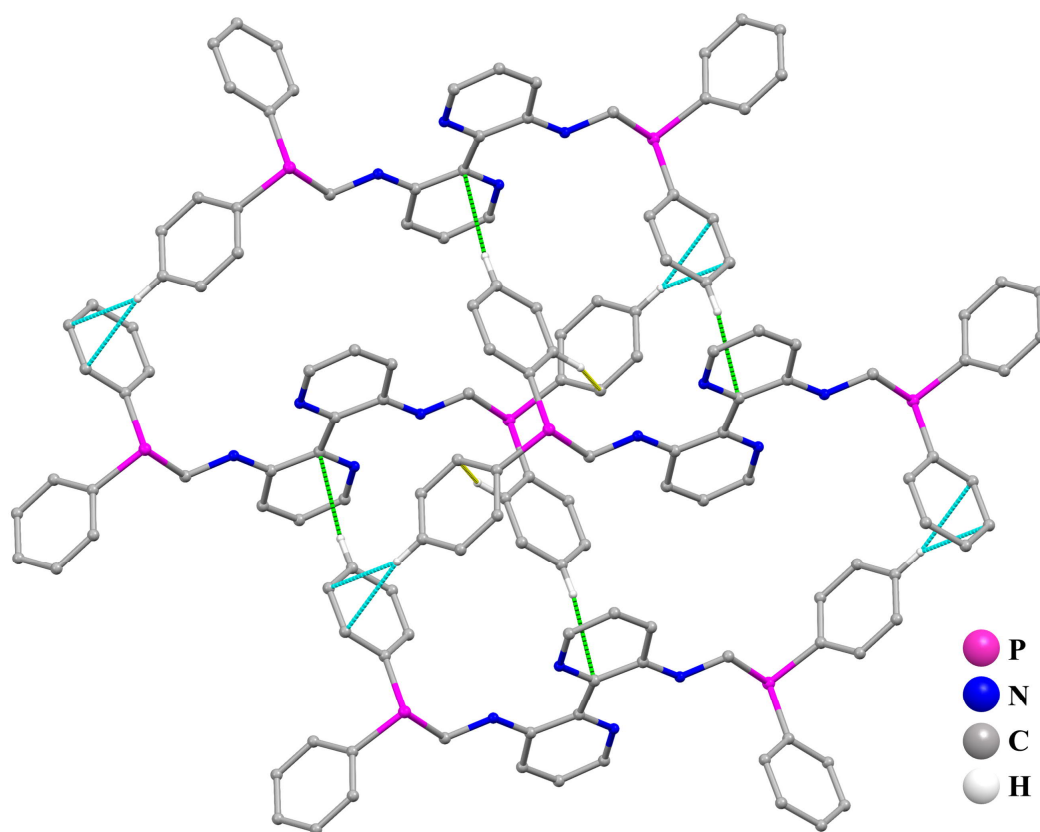

**Fig. S2** Intermolecular C–H··· $\pi$  interactions occur in crystal packing of ligand **1** and are depicted by dashed line; *green lines*: H10···C1 = 2.686 Å, C10–H10···C1 = 173°; *light blue line*: H16···centroid (C8–C9) = 2.697 Å, C16–H16···centroid = 150°; *yellow line*: H12···C18 = 2.894 Å, C12–H12···C18 = 129°.

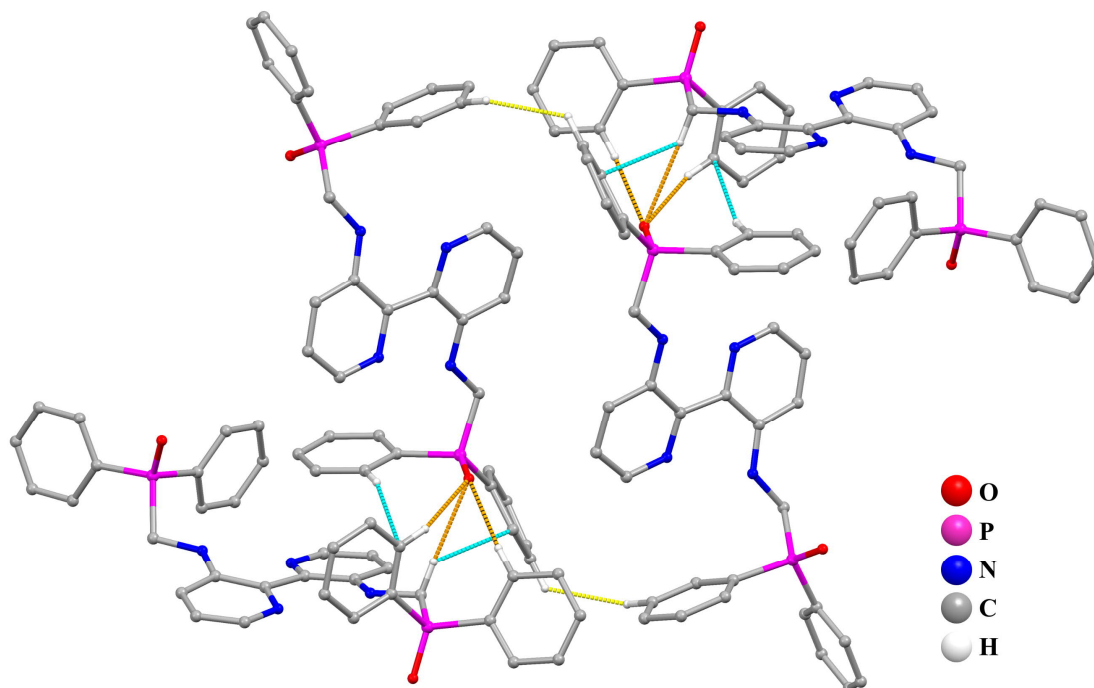

**Fig. S3** Dash line represents various intermolecular interactions occur in **2**; *yellow line*, H···H interactions: H20···H35 = 2.358 Å; *orange line*, O···H interactions: O2···H24A/H26/H32 2.336

to 2.633 Å; *light blue lines*, C–H... $\pi$  interactions: H30...C26 = 2.850 Å, C30–H30...C26 = 161°, H24A...C36 = 2.873 Å, C24–H24A...C36 = 121°.

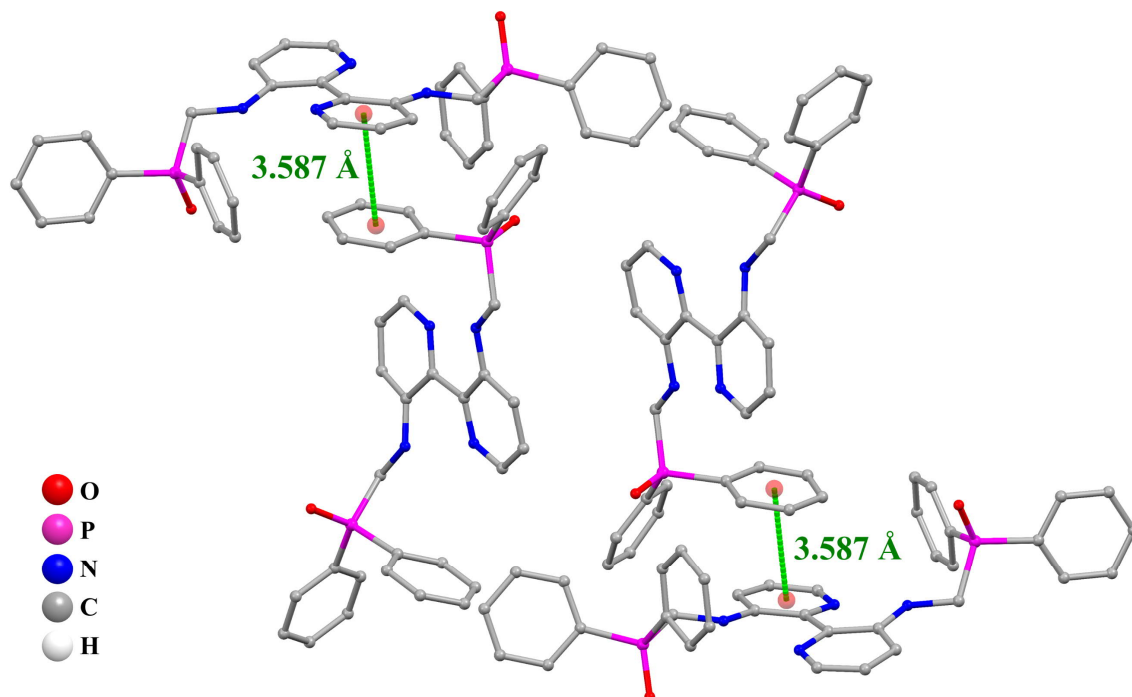

**Fig. S4** Sandwich type  $\pi$ -stacking or  $\pi$ - $\pi$  stacking occurs in crystal packing of compound **2**.

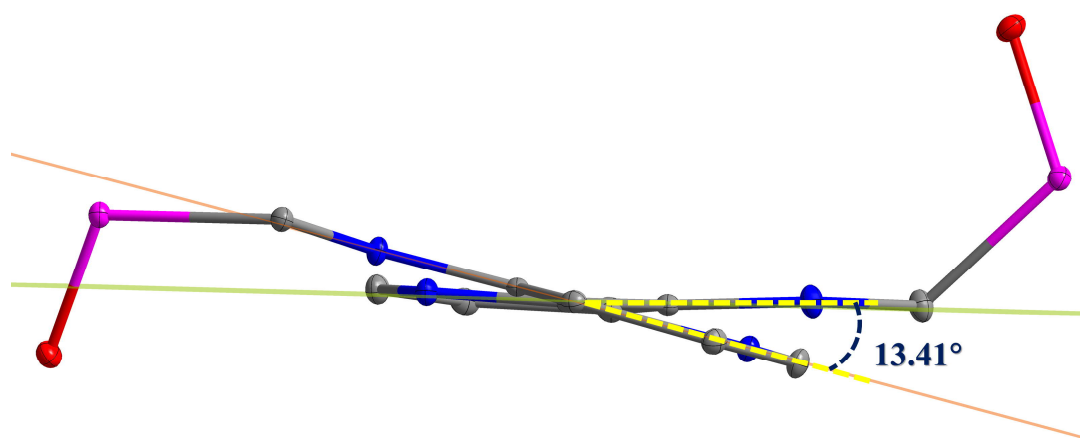

**Fig. S5** Dihedral angle between two mean planes: N1-C1-C2-N3 (green) and N2-C6-C7-N4 (orange) in **2** (P: magenta, N: blue, O: red, C: grey, phenyl rings and H atoms are omitted for clarity).



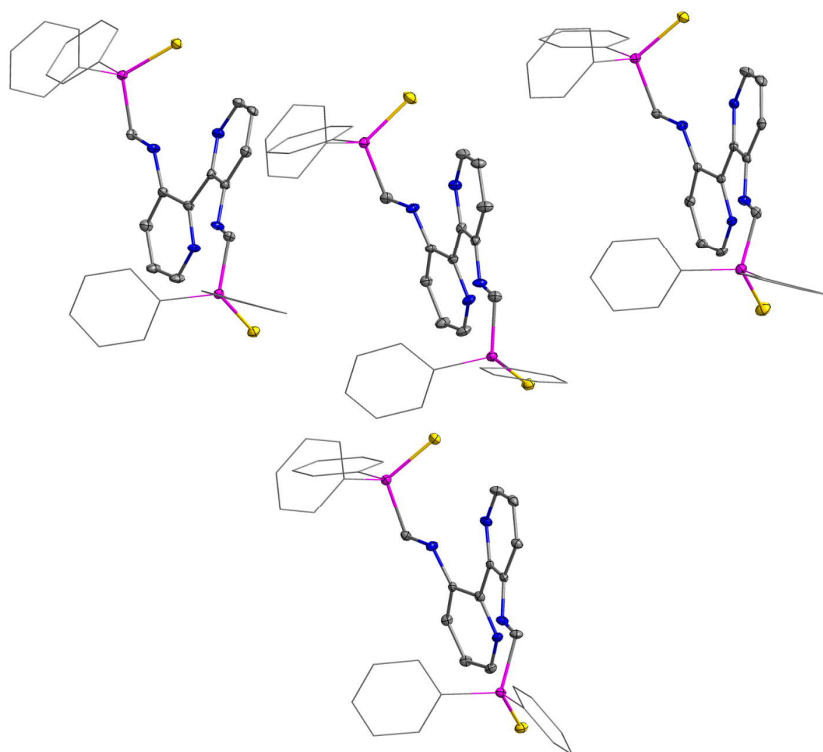

**Fig. S6** Asymmetric unit of compound **3** (P: magenta, N: blue, S: dark yellow, C: grey, H atoms are omitted for clarity).

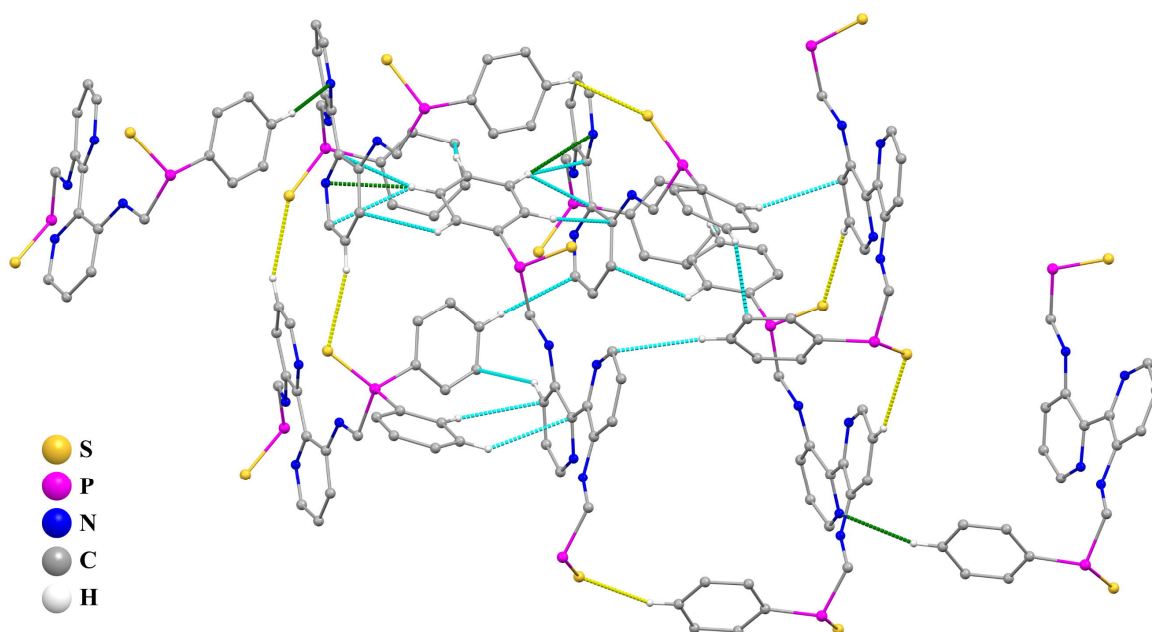

**Fig. S7** Dash line represents various intermolecular interactions occur in **3**: *green line*, N...H interactions: N1...H51 = 2.656 Å, N4...H137 = 2.637 Å, N2...H135 = 2.731 Å; *yellow lines*, S...H interactions: S1...H81 = 2.871 Å, S5...H9 = 2.876 Å, S7...H34 = 2.949 Å; *light blue lines*, C-H... $\pi$  interactions: distances = 2.730 to 2.899 Å, angles = 124° to 171°.

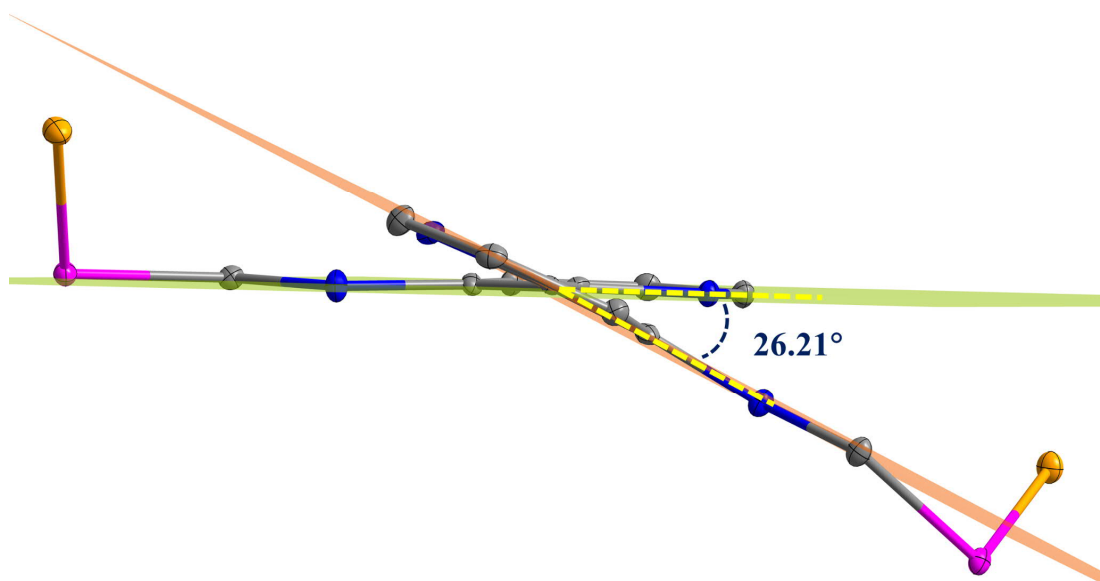

**Fig. S8** Dihedral angle between two mean planes: N1-C1-C2-N3 (green) and N2-C6-C7-N4 (orange) in **3** (P: magenta, N: blue, O: red, C: grey, phenyl rings and H atoms are omitted for clarity).

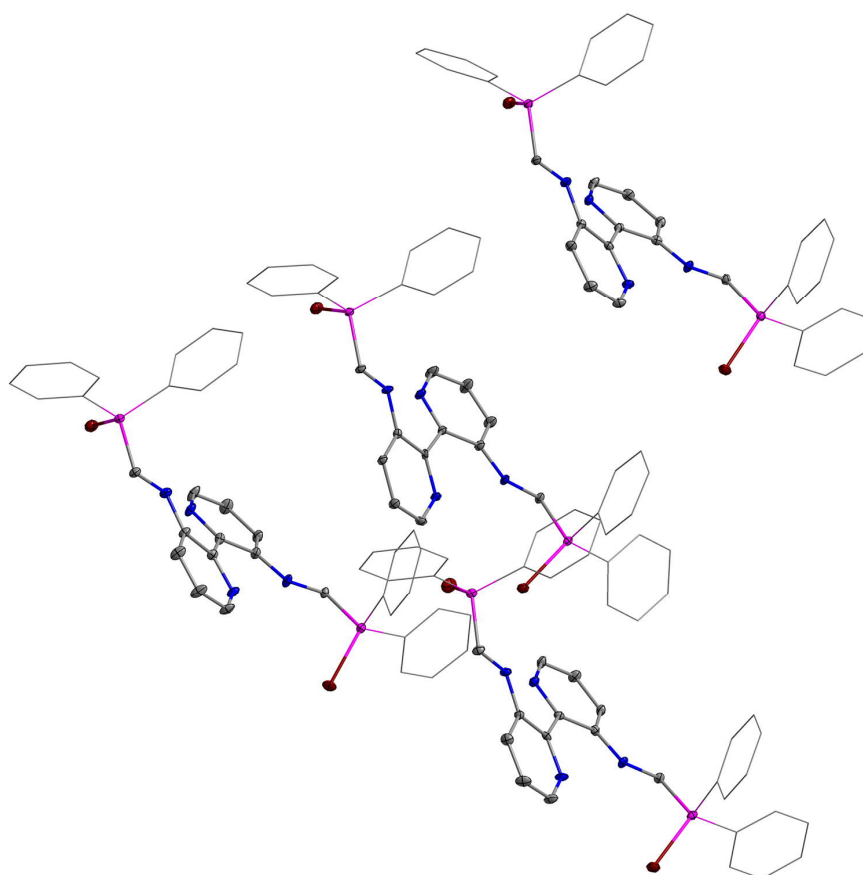

**Fig. S9** Asymmetric unit of compound **4** (P: magenta, N: blue, Se: dark brown, C: grey, H atoms are omitted for clarity).

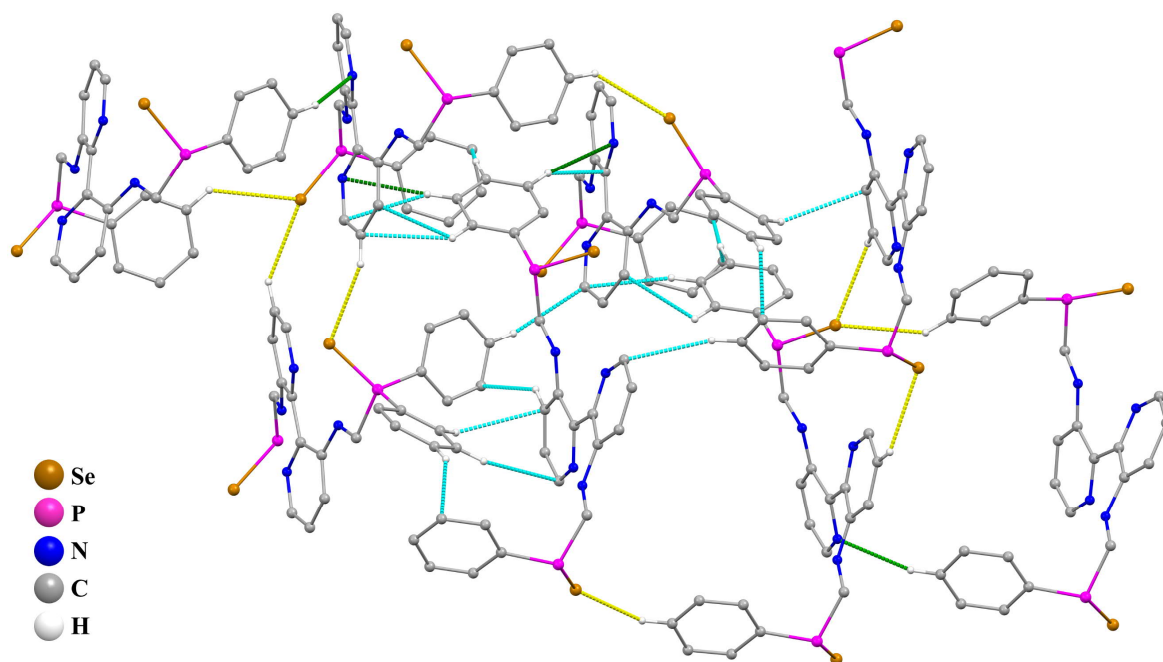

**Fig. S10** Dash line represents various intermolecular interactions occur in **4**: *green line*, N...H interactions: N1...H16A = 2.610 Å, N5...H100 = 2.647 Å, N7...H14A = 2.749 Å; *yellow lines*, Se...H interactions: distances = 2.957 to 3.089 Å; *light blue lines*, C-H... $\pi$  interactions: distances = 2.757 to 2.891 Å, angles = 124° to 164°.

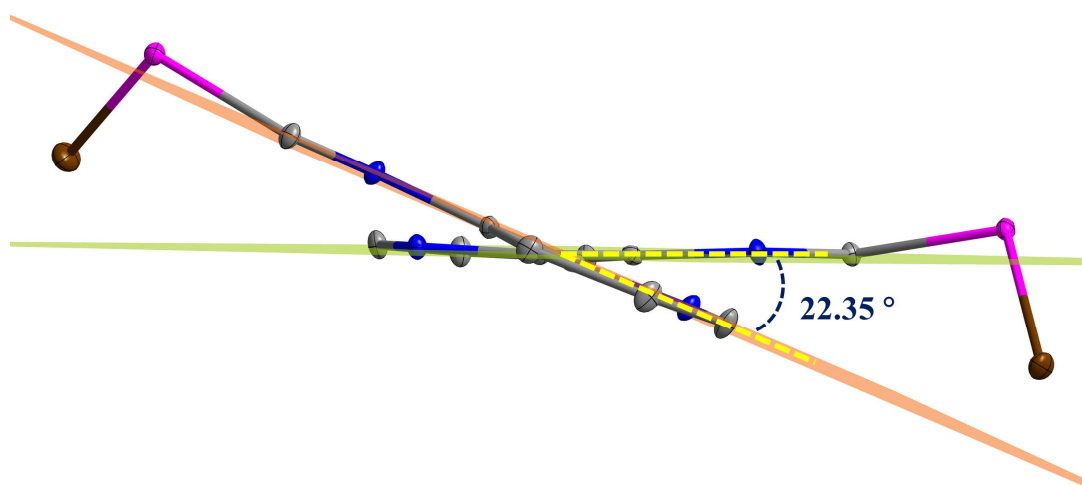

**Fig. S11** Dihedral angle between two mean planes: N1-C1-C2-N3 (green) and N2-C6-C7-N4 (orange) in **4** (P: magenta, N: blue, Se: dark brown, C: grey, phenyl rings and H atoms are omitted for clarity).

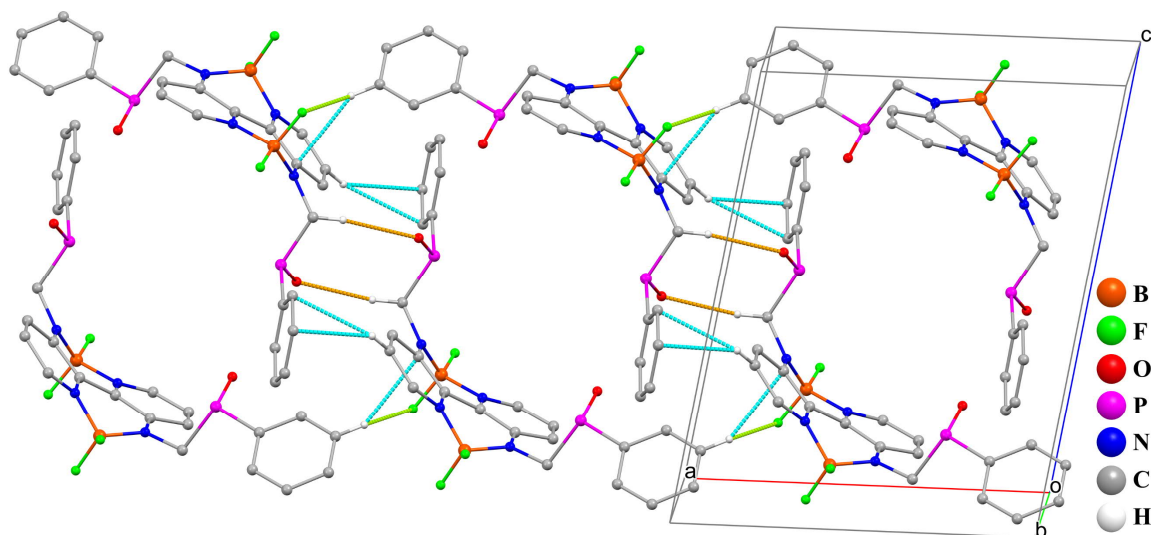

**Fig. S12** Dash line represents various intermolecular interactions occur in **5**: *light green line*, F...H interactions: F4...H35 = 2.527 Å; *orange lines*, O...H interactions: O1...H11A = 2.570 Å; *light blue line*, C-H... $\pi$  interactions: H35...C2 = 2.774 Å, C35-H35...C2 = 144°, H4...centroid(C13-C14) = 2.737 Å, C4-H4...centroid(C13-C14) = 153°.

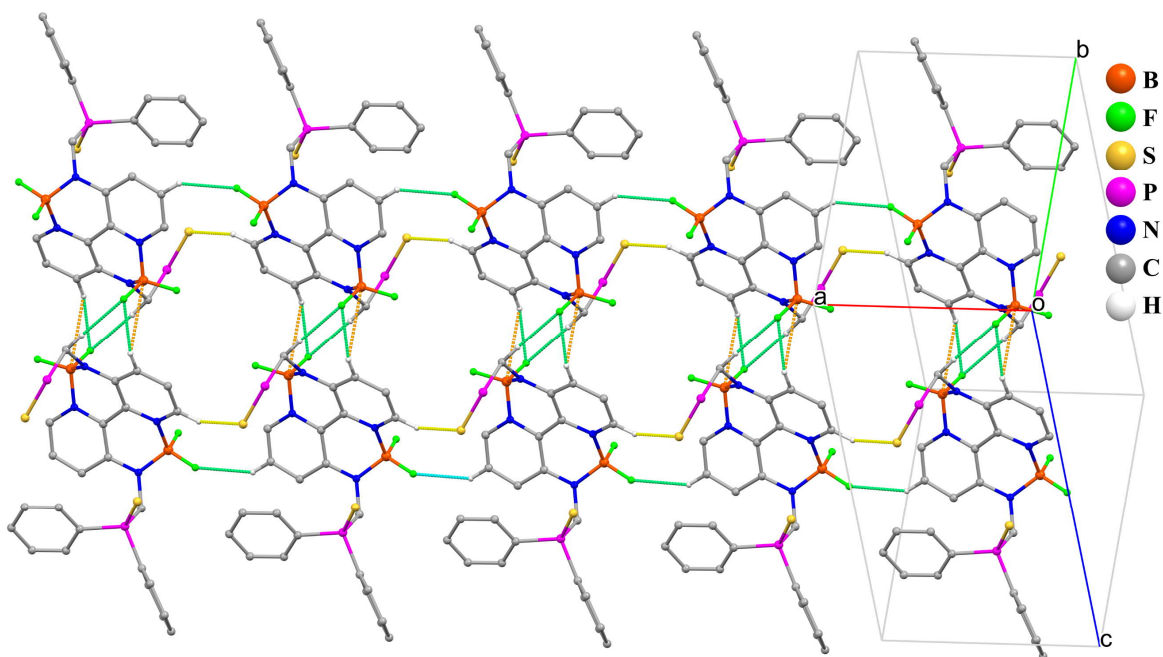

**Fig. S13** Dash line represents various intermolecular interactions occur in **6**: *yellow line*, S...H interactions: S2...H10 = 2.834 Å; *light green line*, F...H interactions: F2...H8 = 2.405 Å, F2...H24B = 2.548 Å, F3...H4 = 2.516 Å; *orange lines*, B...H interactions: B1...H8 = 2.971 Å.

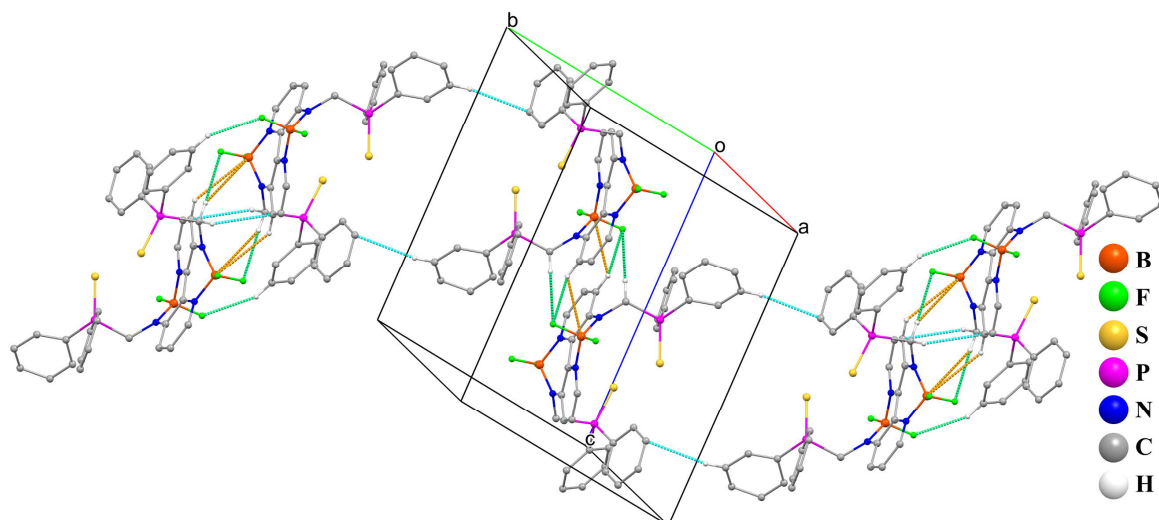

**Fig. S14** Dash line represents various intermolecular interactions occur in **6**: *green line*, F...H interactions: F2...H8 = 2.405 Å, F2...H24B = 2.548 Å, F2...H14 = 2.588 Å, F4...H11B = 2.499 Å; *orange lines*, B...H interactions: B1...H8 = 2.971 Å, B2...H3 = 3.171 Å, B2...H11B = 3.104 Å; *light blue line*, C–H... $\pi$  interactions: H11A...C3 = 2.778 Å, C11–H11A...C3 = 124°, H33...C22 = 2.885 Å, C33–H33... C22 = 164°.

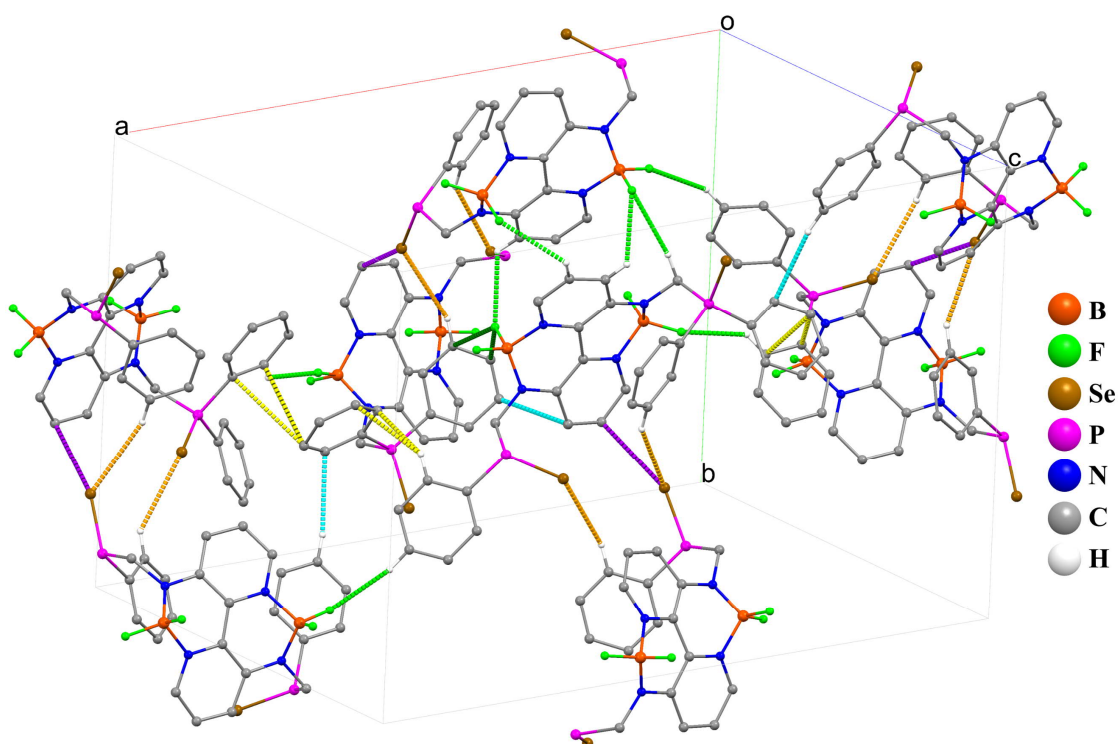

**Fig. S15** Dash line represents various intermolecular interactions occur in **7**: *orange line*, Se...H interactions: Se1...H66 = 3.050 Å, Se4...H35 = 3.047 Å; *pink lines*, Se...C<sub>arena</sub> interactions: Se4...C4 = 3.472 Å; *light green line*, F...H interactions: distances = 2.451 to 2.668 Å; *dark green line*, F...C<sub>arena</sub> interactions: F4...centroid(C34–C35) = 3.035 Å; *light blue line*, C–H... $\pi$  interactions: H52...C30 = 2.858 Å, C52–H52...C30 = 168°, H19...centroid(C26–C27) = 2.733

Å, C19–H19...centroid(C26–C27) = 140°; *yellow line*,  $\pi$ - $\pi$  interaction: C29...centroid(C12–C17) = 3.278 Å.

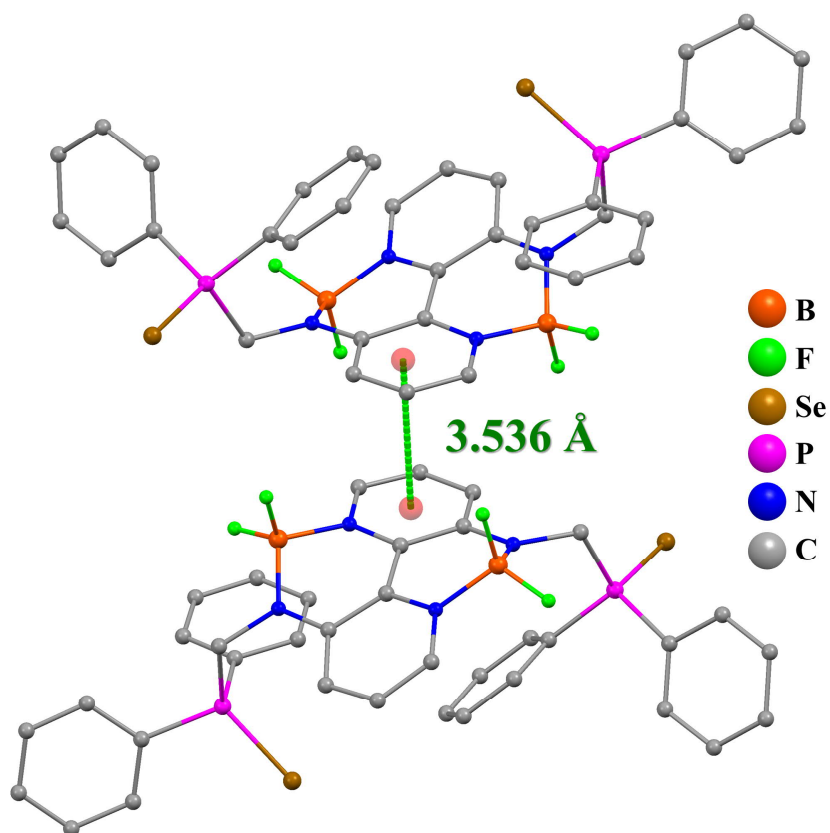

**Fig. S16** Sandwich type pi-stacking or  $\pi$ - $\pi$  stacking occurs in crystal packing of compound **7**.

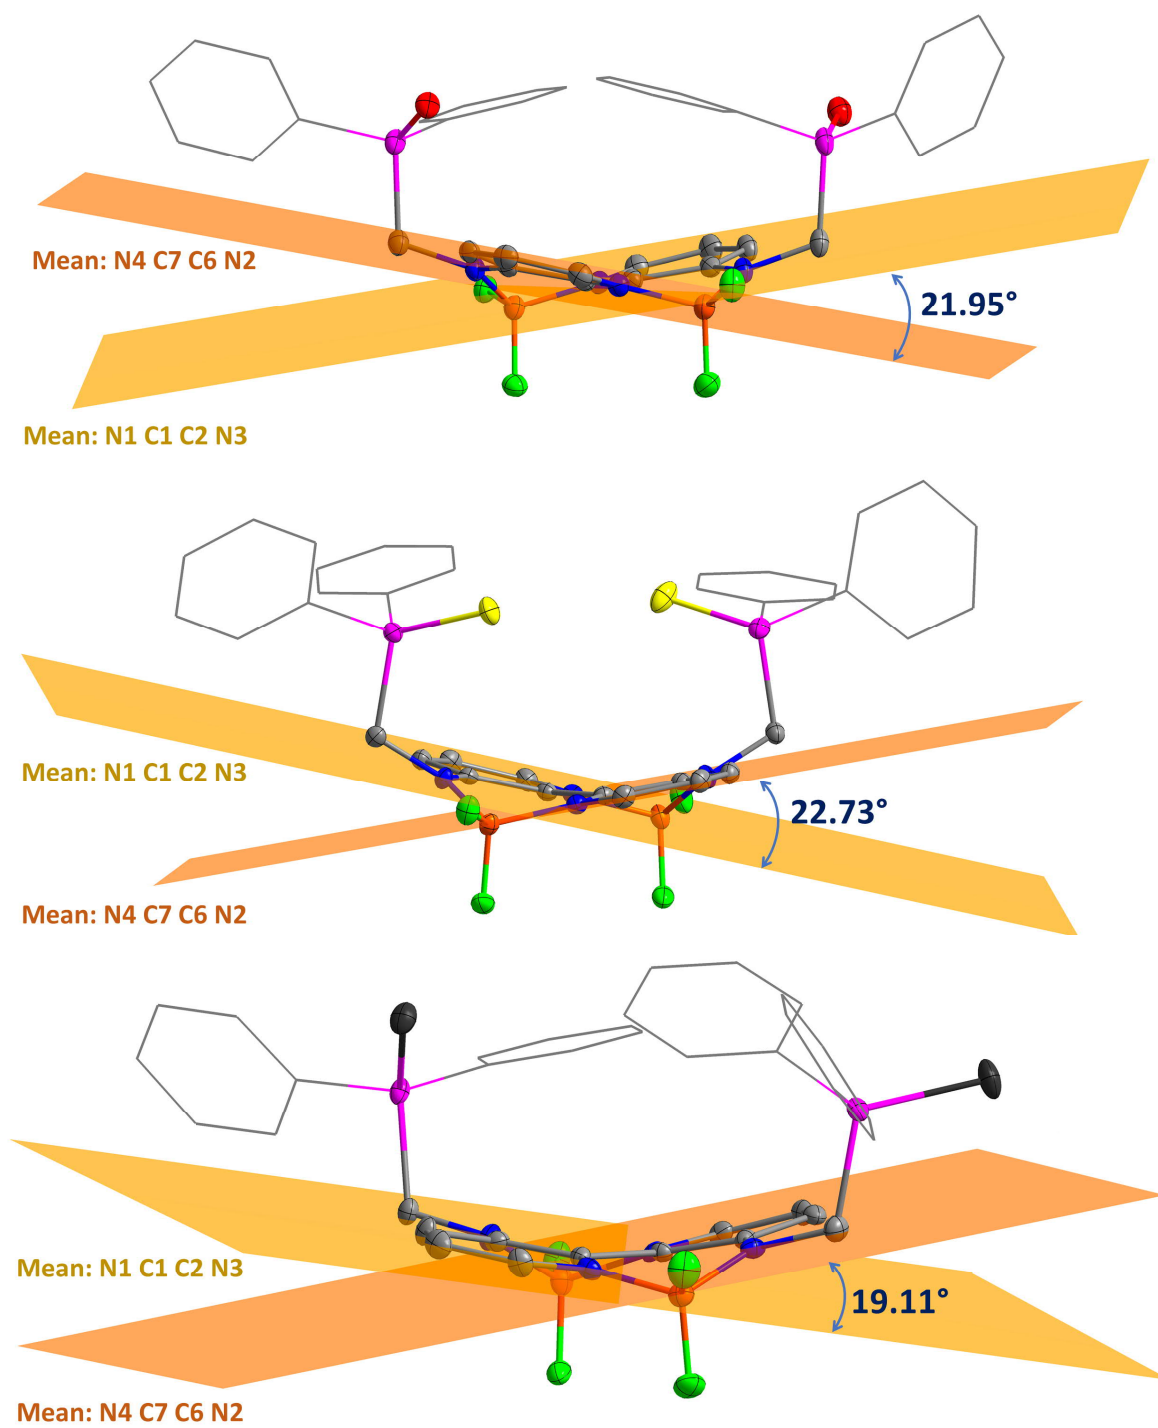

**Fig. S17** Dihedral angled of **5** (top), **6** (middle) and **7** (bottom).

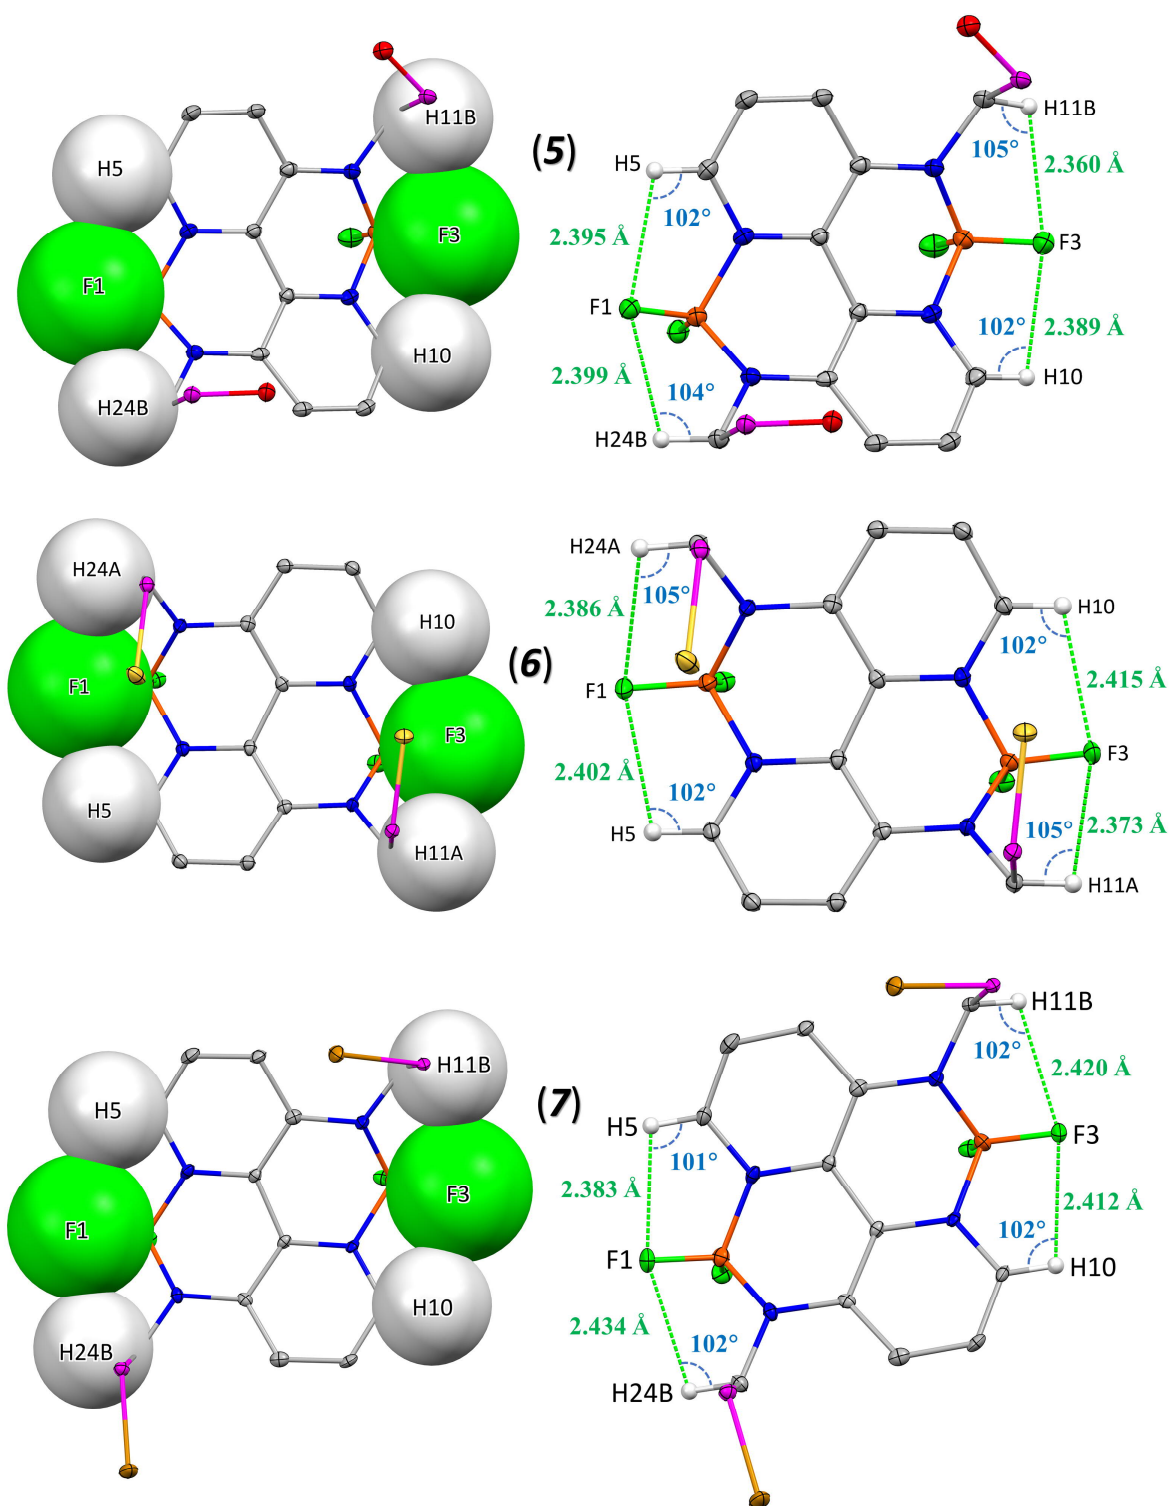

**Fig. S18** Intramolecular F...H-C interaction of **5** (top), **6** (middle) and **7** (bottom); left-side images showing space filling models and right-side images showing thermal ellipsoid models of respective compounds.



**Table S4** Bond distances (Å) and bond angles (°) of intramolecular F...H-C interaction of compounds **5-7**.

|          | <b>5</b> |       | <b>6</b> |       | <b>6·CH<sub>2</sub>Cl<sub>2</sub></b> |       | <b>7</b> |       |
|----------|----------|-------|----------|-------|---------------------------------------|-------|----------|-------|
|          | F...H    | angle | F...H    | angle | F...H                                 | angle | F...H    | angle |
| F1...H5  | 2.395    | 102   | 2.402    | 102   | 2.424                                 | 101   | 2.383    | 101   |
| F1...H24 | 2.399    | 104   | 2.386    | 105   | 2.384                                 | 103   | 2.434    | 102   |
| F3...H10 | 2.389    | 102   | 2.415    | 102   | 2.420                                 | 102   | 2.412    | 102   |
| F3...H11 | 2.360    | 105   | 2.373    | 105   | 2.460                                 | 100   | 2.420    | 102   |

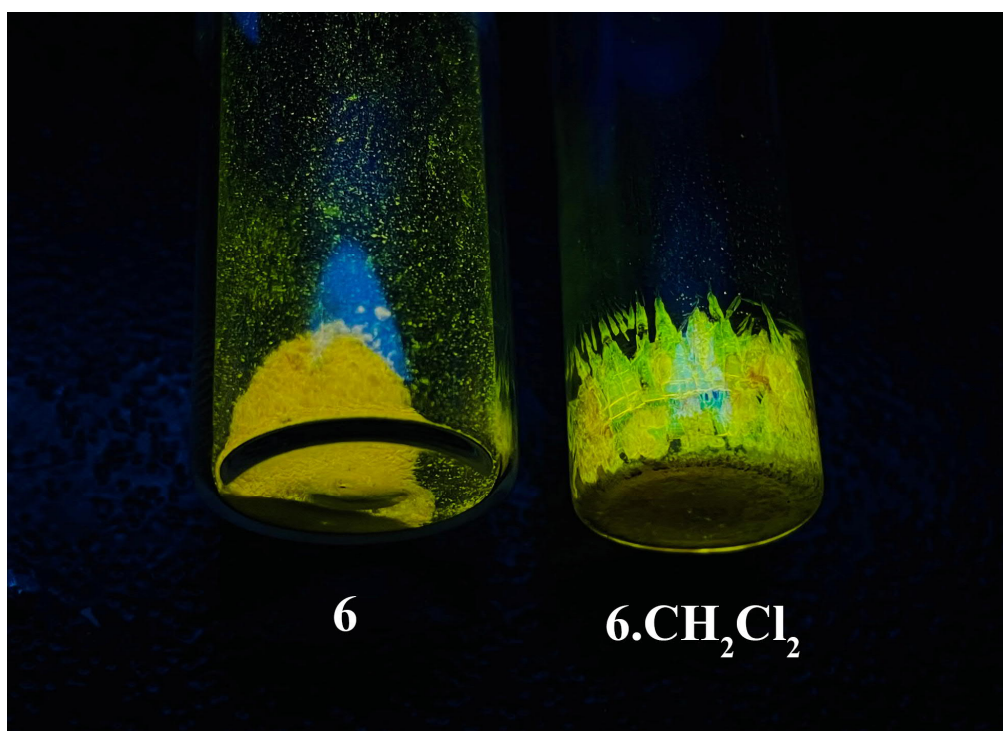

**Fig. S19** Images of solid compounds **6** and **6·CH<sub>2</sub>Cl<sub>2</sub>** under UV light (at 365 nm).

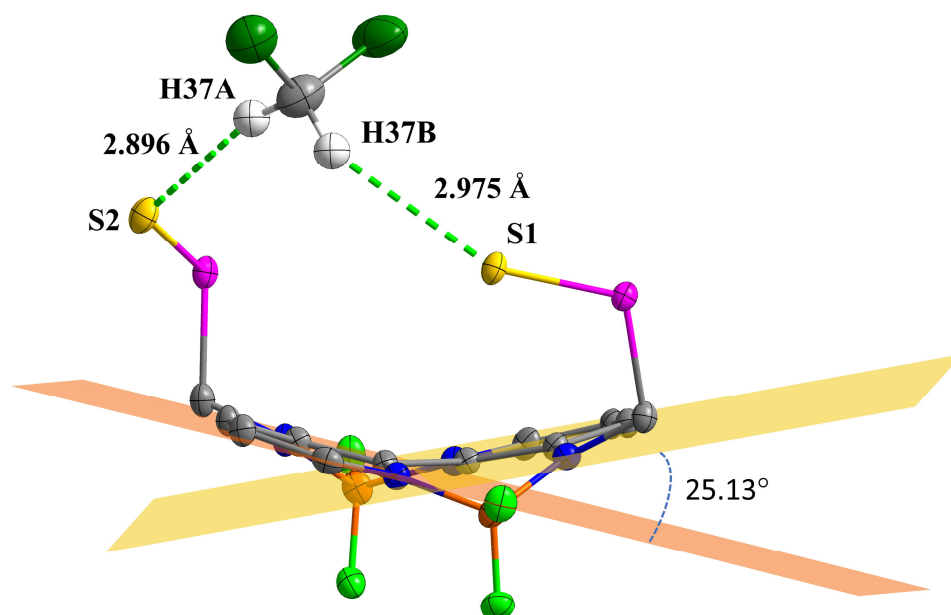

**Fig. S20** Dihedral angled and S...H-C interactions of compound **6·CH<sub>2</sub>Cl<sub>2</sub>**.

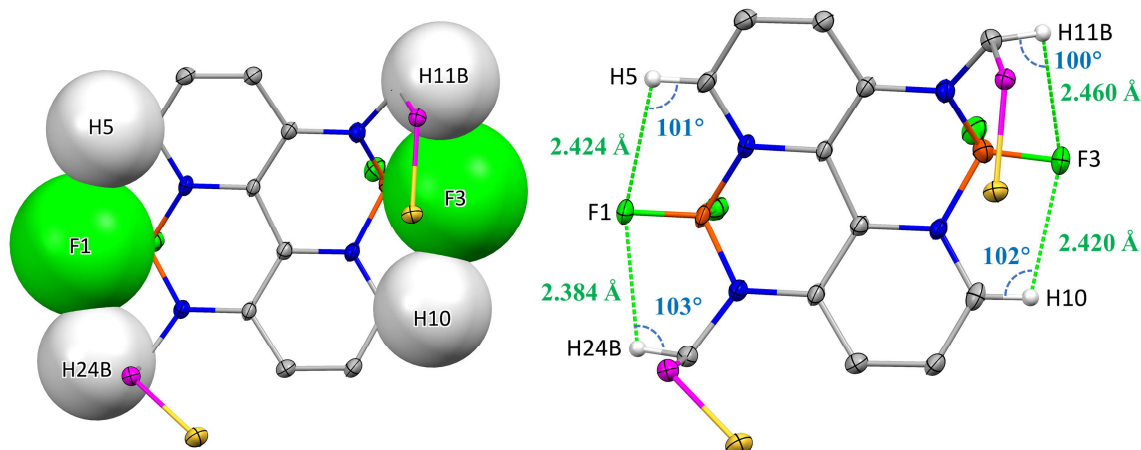

**Fig. S21** Intramolecular F...H-C interaction of compound **6·CH<sub>2</sub>Cl<sub>2</sub>**.

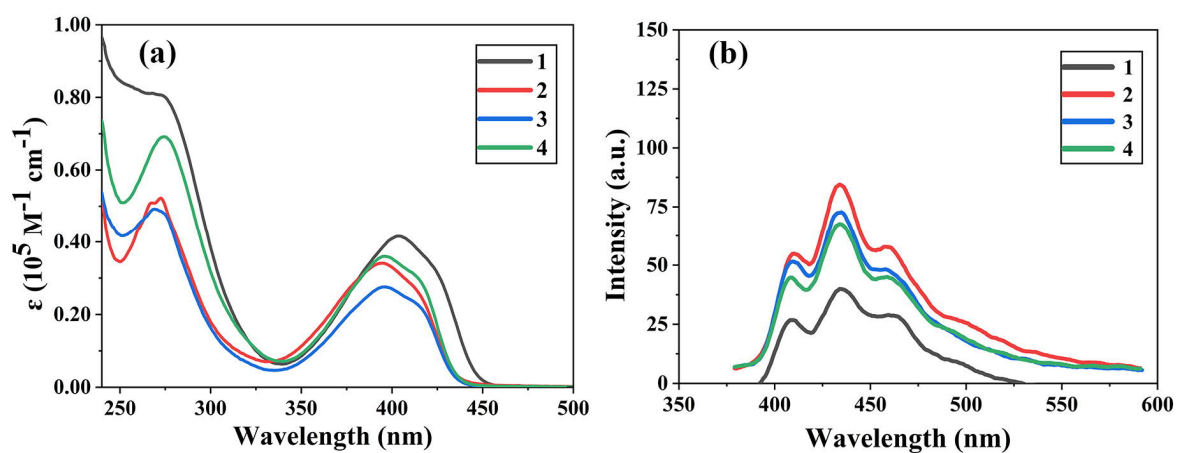

**Fig. S22** (a) UV-vis absorption and (b) emission spectra of **1-4** recorded in chloroform ( $1 \times 10^{-5}$  M) at room temperature.

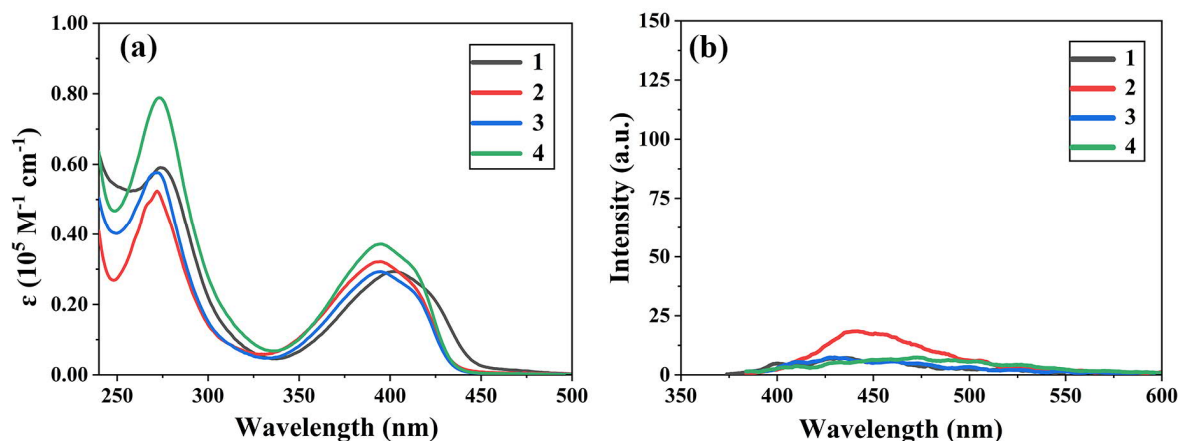

**Fig. S23** (a) UV-vis absorption and (b) emission spectra of **1-4** recorded in acetonitrile ( $1 \times 10^{-5}$  M) at room temperature.

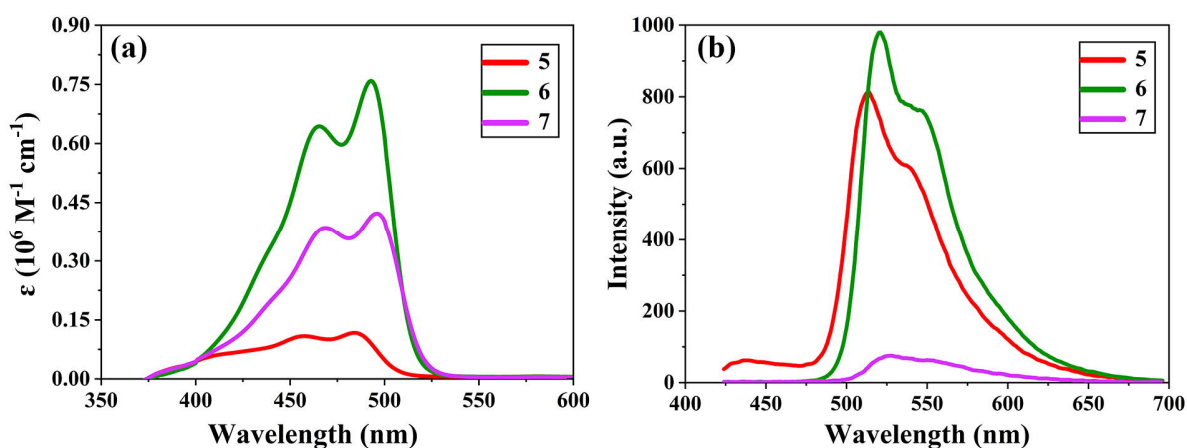

**Fig. S24** (a) UV-vis absorption and (b) emission spectra of **5-7** recorded in chloroform ( $1 \times 10^{-6}$  M) at room temperature.

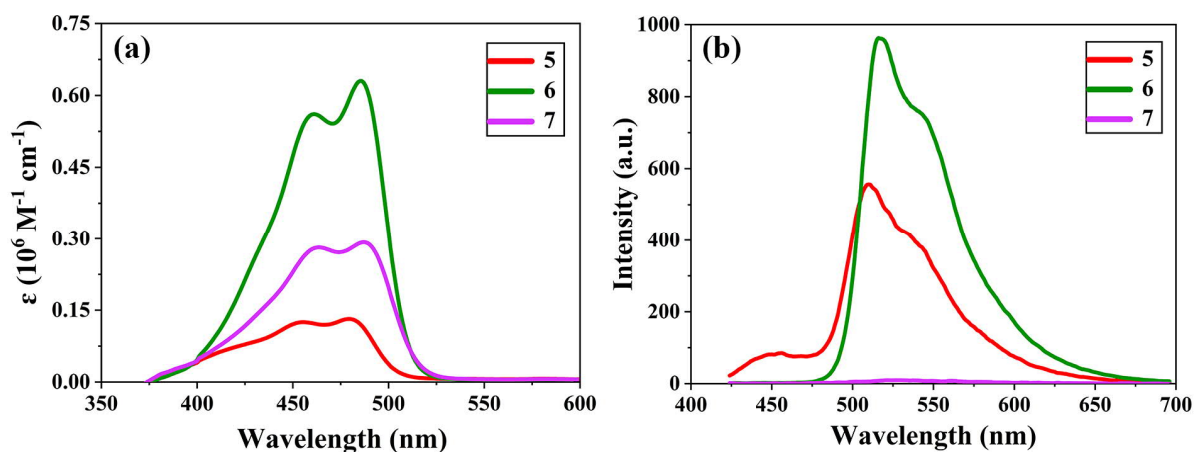

**Fig. S25** (a) UV-vis absorption and (b) emission spectra of **5-7** recorded in acetonitrile ( $1 \times 10^{-6}$  M) at room temperature.

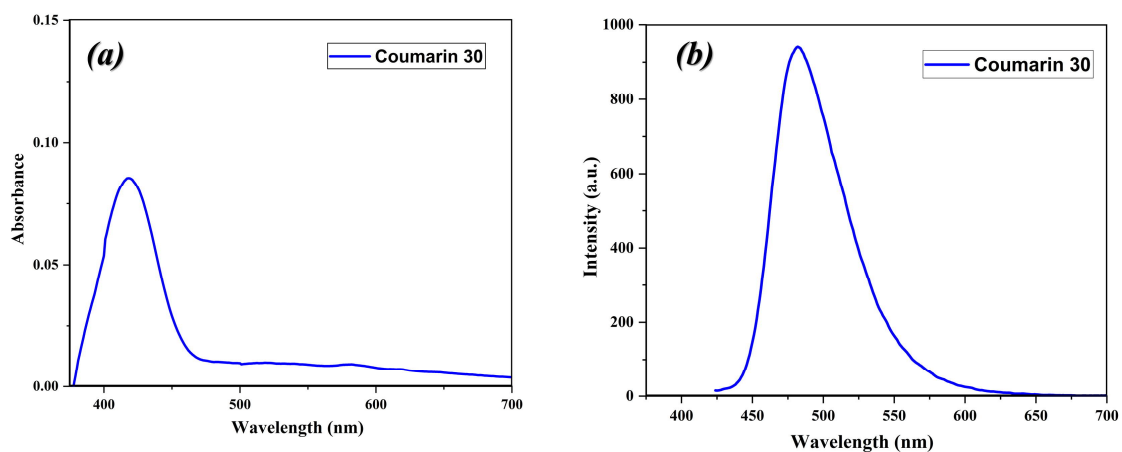

**Fig. S26** UV-vis absorption (a) and fluorescence (b) spectra of Coumarin 30 in 90% ethanol at room temperature.

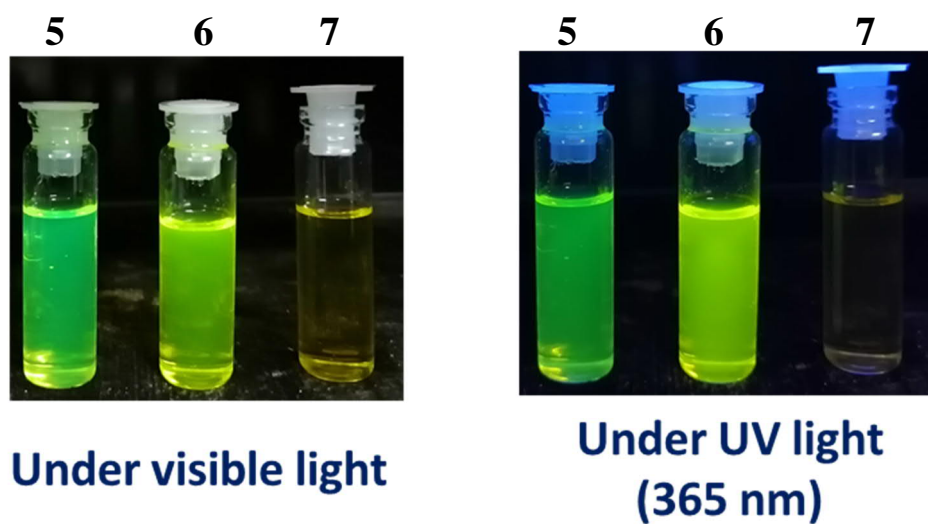

**Fig. S27** Images of compounds 5-7 in  $\text{CH}_2\text{Cl}_2$  taken under visible light (left) and UV light at 365 nm (right).

## Molecular orbitals and TD-DFT calculations

All DFT calculations were performed with the Gaussian09 (Rev. D.01) suite of programs.<sup>5</sup> The input files were generated from GaussView 6.0 program.<sup>6</sup> Ground state geometries were optimized using the hybrid density functional B3LYP with split valence polarised (SVP) basis set. Frequency calculations were performed subsequently to confirm the presence of local minima (only positive frequencies). Vertical excitations (40 singlet excited states) were calculated by TD-DFT method at the B3LYP/TZVP level.<sup>7, 8</sup> Solvent (Chloroform) effects were incorporated using polarizable continuum model (PCM) during both optimization and TD-DFT calculations. Molecular orbitals were visualised using Chemcraft software with contour value: 0.030.

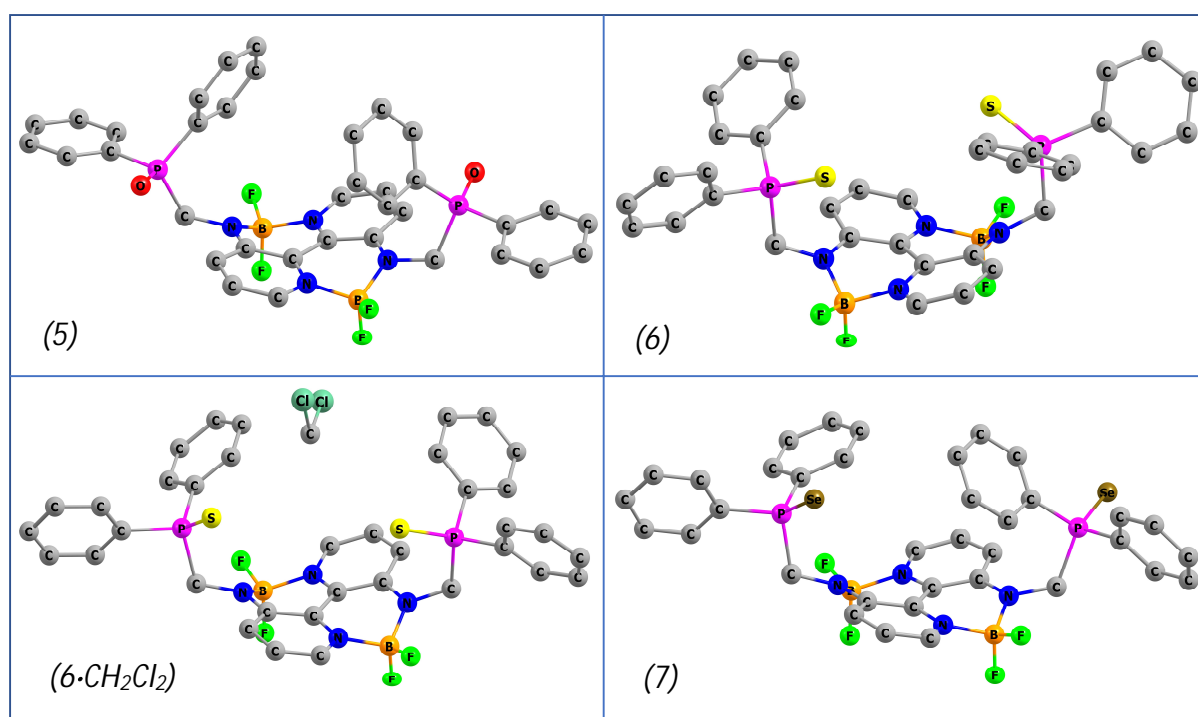

**Fig. S28** Optimized structures of compounds 5-7 (Gaussian 09; B3LYP/TZVP).

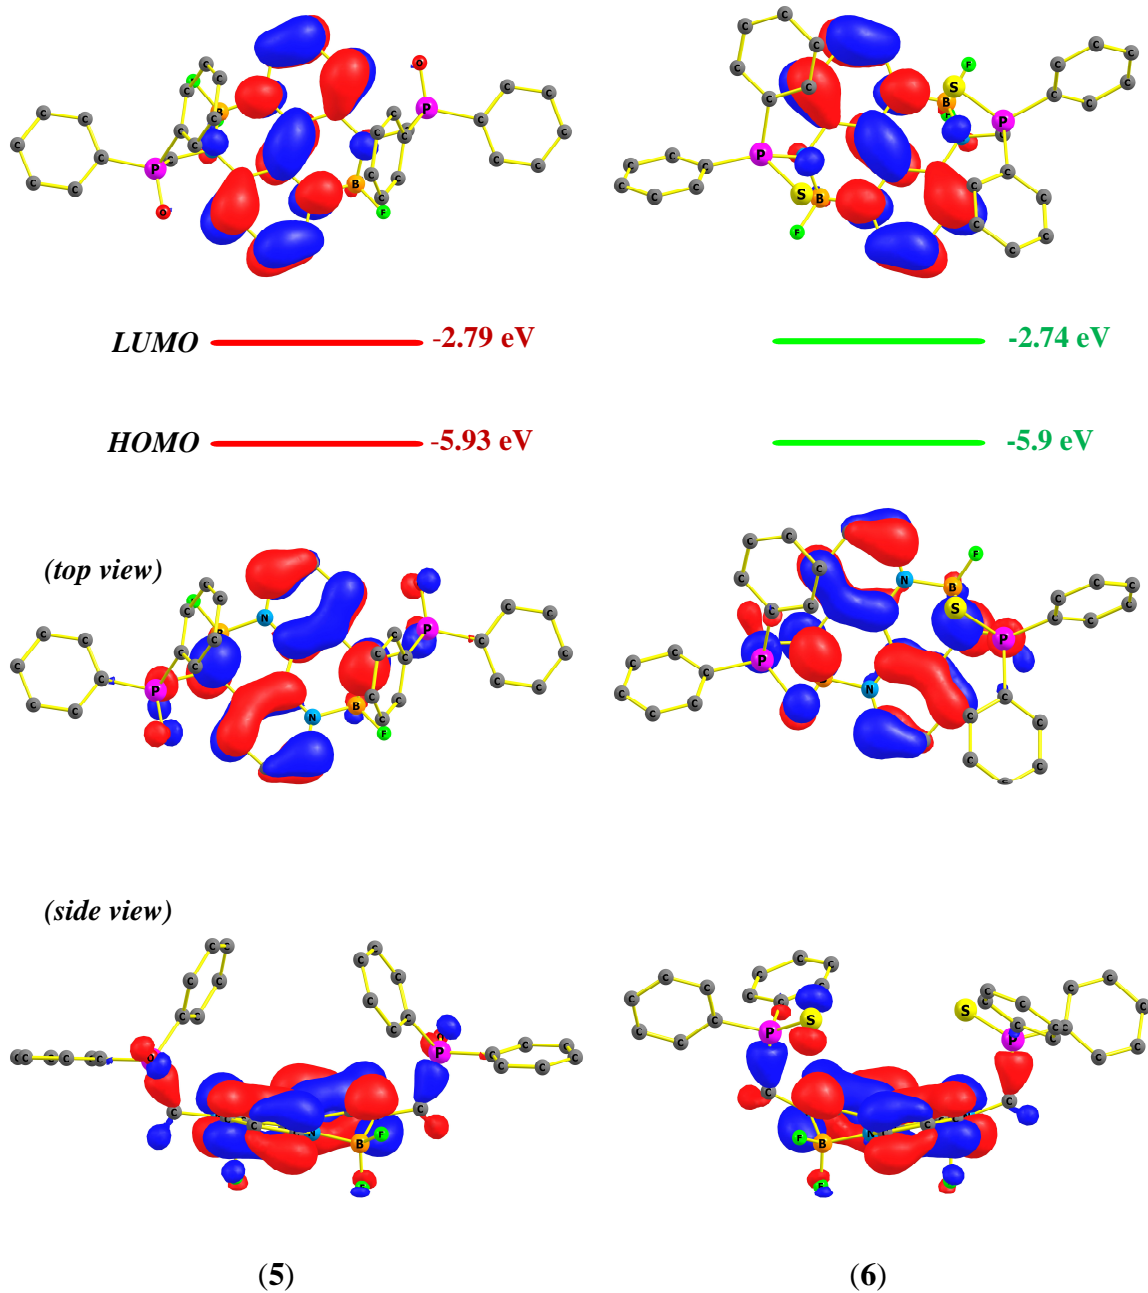

**Fig. S29** Pictographic drawings of LUMO/HOMO and energy levels of **5** and **6** (Gaussian 09; B3LYP/TZVP).

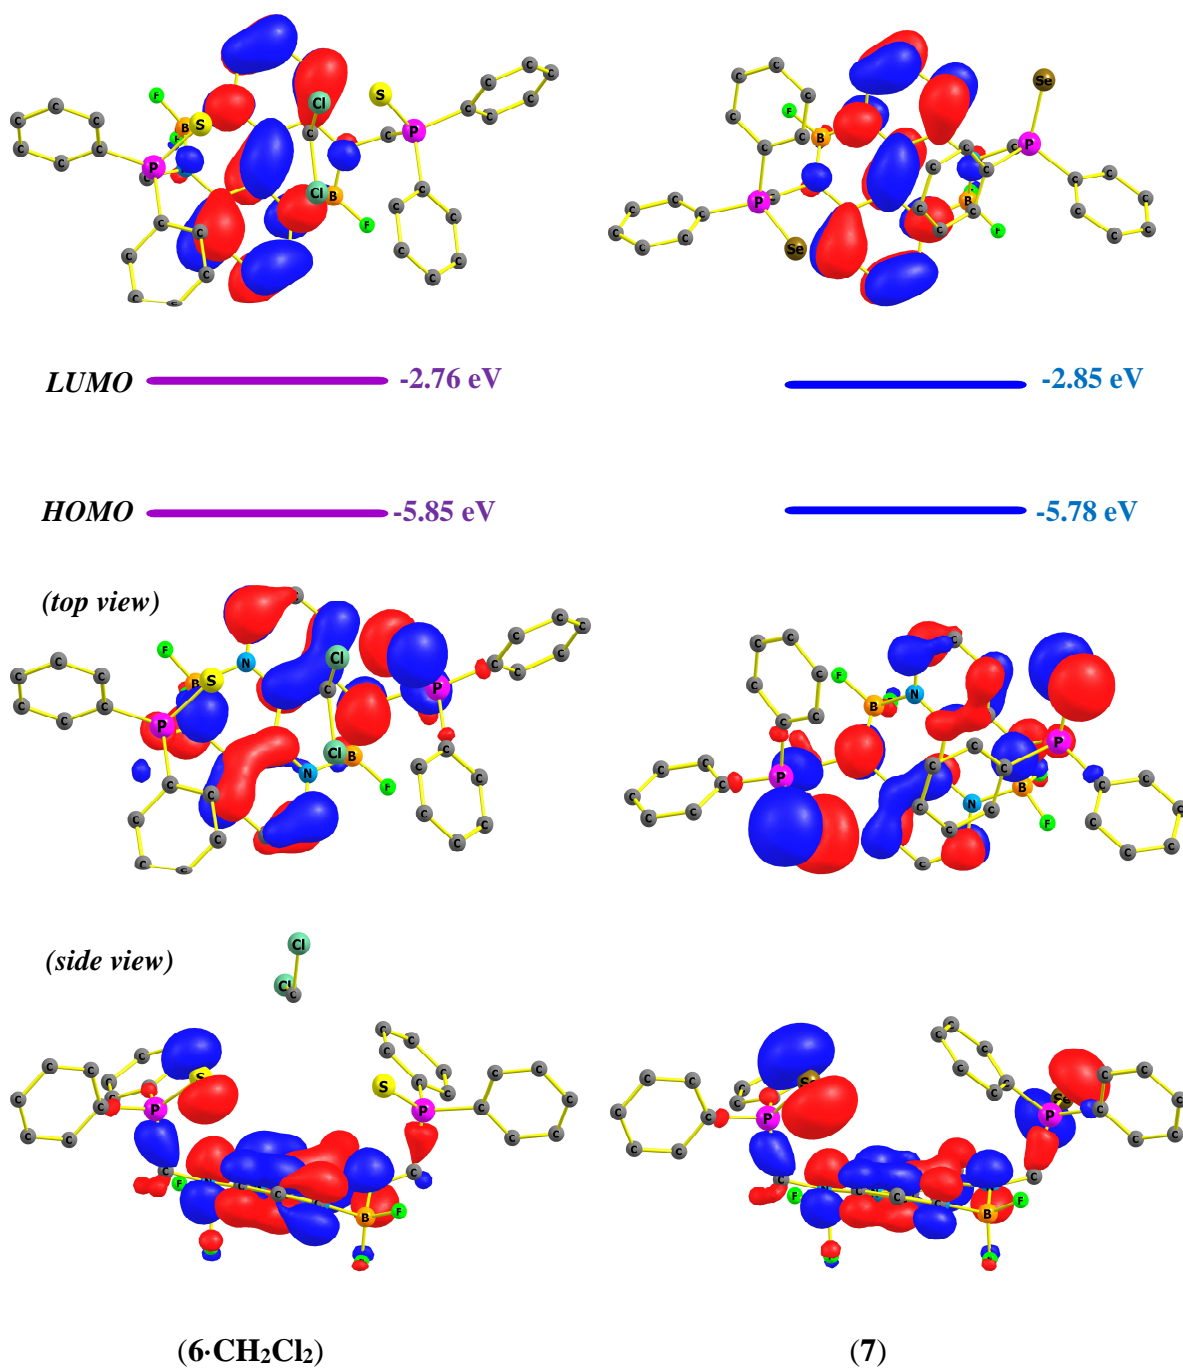

**Fig. S30** Pictographic drawings of LUMO/HOMO and energy levels of **6-CH<sub>2</sub>Cl<sub>2</sub>** and **7** (Gaussian 09; B3LYP/TZVP).

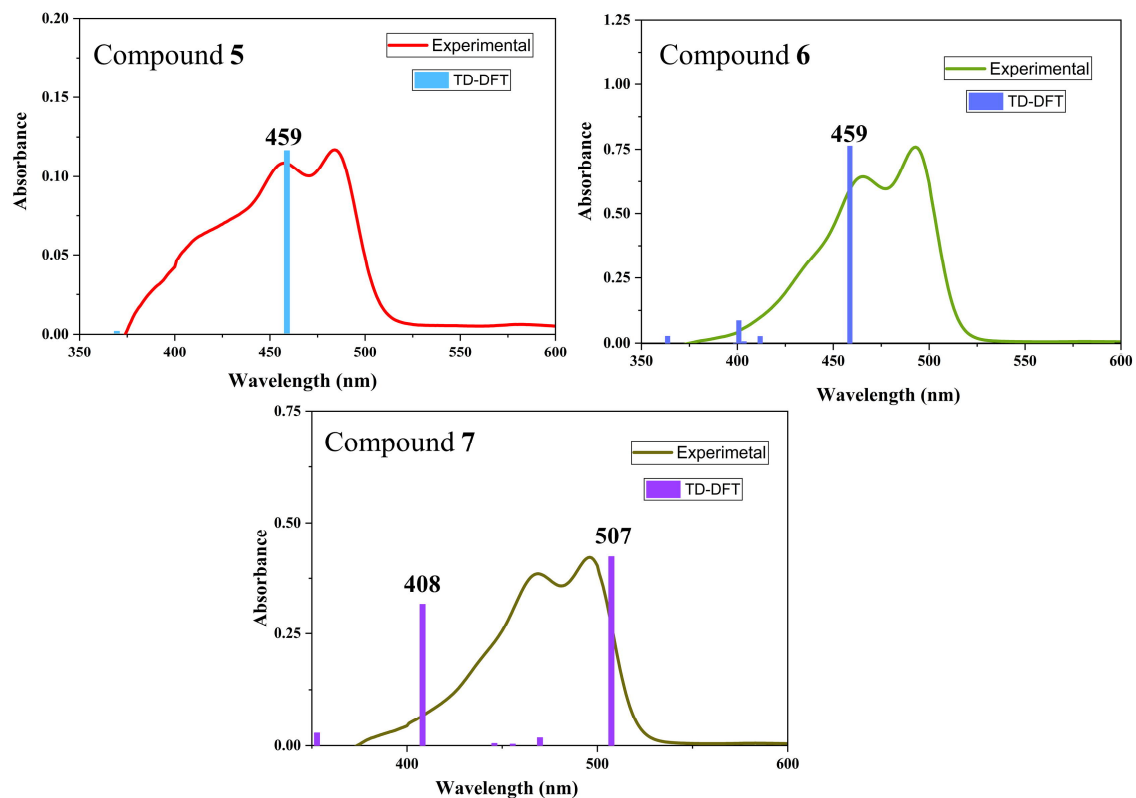

**Fig. S31** Calculated absorption spectrum of **5-7** based on the TDDFT method at the B3LYP/TZVP level (aqua bars) overlaid on the UV/Vis absorption spectrum of **5-7** in chloroform.

**Table S5** TD-DFT data for compounds **5-7** (Gaussian 09; B3LYP/TZVP).

| Comp     | Transition            | $E_{ex}$ (eV) | $\lambda$ (nm) | Oscillator strength $f$ | Assignment                 |
|----------|-----------------------|---------------|----------------|-------------------------|----------------------------|
| <b>5</b> | $S_0 \rightarrow S_1$ | 2.7015        | 458.9          | 0.3195                  | H $\rightarrow$ L (0.70)   |
| <b>6</b> | $S_0 \rightarrow S_1$ | 2.7029        | 458.71         | 0.2911                  | H $\rightarrow$ L (0.70)   |
| <b>7</b> | $S_0 \rightarrow S_1$ | 2.4437        | 507.37         | 0.1875                  | H $\rightarrow$ L (0.70)   |
|          | $S_0 \rightarrow S_5$ | 3.0375        | 408.18         | 0.1401                  | H-4 $\rightarrow$ L (0.70) |



**Table S6** Selected bond length and bond angles of **5-7** obtained from X-ray diffraction analysis and **DFT calculation (B3LYP/TZVP)**.

| Selected bond distances (Å) |                  |            |                  |            |                                               |            |                   |            |
|-----------------------------|------------------|------------|------------------|------------|-----------------------------------------------|------------|-------------------|------------|
|                             | <b>5</b> (E = O) |            | <b>6</b> (E = S) |            | <b>6·CH<sub>2</sub>Cl<sub>2</sub></b> (E = S) |            | <b>7</b> (E = Se) |            |
|                             | <i>X-ray</i>     | <i>DFT</i> | <i>X-ray</i>     | <i>DFT</i> | <i>X-ray</i>                                  | <i>DFT</i> | <i>X-ray</i>      | <i>DFT</i> |
| P1–E1                       | 1.491(2)         | 1.517      | 1.9418(10)       | 1.977      | 1.949(3)                                      | 1.978      | 2.1097(19)        | 2.145      |
| P2–E2                       | 1.4939(19)       | 1.517      | 1.9453(10)       | 1.977      | 1.958(3)                                      | 1.984      | 2.101(2)          | 2.148      |
| B1–F1                       | 1.373(4)         | 1.393      | 1.375(3)         | 1.382      | 1.381(8)                                      | 1.369      | 1.381(9)          | 1.384      |
| B1–F2                       | 1.400(4)         | 1.394      | 1.403(3)         | 1.395      | 1.372(10)                                     | 1.382      | 1.398(9)          | 1.395      |
| B2–F3                       | 1.378(3)         | 1.393      | 1.378(3)         | 1.379      | 1.383(9)                                      | 1.384      | 1.377(9)          | 1.391      |
| B2–F4                       | 1.403(4)         | 1.394      | 1.402(3)         | 1.396      | 1.388(10)                                     | 1.395      | 1.395(10)         | 1.393      |
| C1–C6                       | 1.447(4)         | 1.450      | 1.450(3)         | 1.452      | 1.445(9)                                      | 1.451      | 1.458(9)          | 1.451      |
| B1–N1 <sub>coord.</sub>     | 1.587(4)         | 1.597      | 1.582(4)         | 1.597      | 1.578(10)                                     | 1.595      | 1.566(10)         | 1.594      |
| B1–N4 <sub>covalent</sub>   | 1.511(4)         | 1.527      | 1.510(4)         | 1.529      | 1.548(10)                                     | 1.529      | 1.517(10)         | 1.530      |
| B2–N2 <sub>coord.</sub>     | 1.590(4)         | 1.597      | 1.581(4)         | 1.599      | 1.566(10)                                     | 1.595      | 1.582(10)         | 1.594      |
| B2–N3 <sub>covalent</sub>   | 1.498(4)         | 1.527      | 1.505(3)         | 1.530      | 1.530(10)                                     | 1.529      | 1.513(10)         | 1.528      |
| F1...H5                     | 2.395            | 2.274      | 2.402            | 2.284      | 2.424                                         | 2.282      | 2.383             | 2.284      |
| F1...H24                    | 2.399            | 2.260      | 2.386            | 2.264      | 2.384                                         | 2.263      | 2.434             | 2.311      |
| F3...H10                    | 2.389            | 2.274      | 2.415            | 2.290      | 2.420                                         | 2.281      | 2.412             | 2.278      |
| F3...H11                    | 2.360            | 2.260      | 2.373            | 2.297      | 2.460                                         | 2.337      | 2.420             | 2.309      |
| Selected bond angles (deg.) |                  |            |                  |            |                                               |            |                   |            |
| N1–B1–N4                    | 106.0(2)         | 107.4      | 107.3(2)         | 106.1      | 106.1(6)                                      | 106.6      | 108.5(6)          | 107.6      |
| N2–B2–N3                    | 107.5(2)         | 107.4      | 107.7(2)         | 106.6      | 107.3(6)                                      | 106.9      | 107.1(6)          | 106.6      |
| F1–B1–F2                    | 110.1(2)         | 110.02     | 110.5(2)         | 110.9      | 111.7(6)                                      | 110.8      | 109.8(6)          | 110.7      |
| F3–B2–F4                    | 108.9(2)         | 110.02     | 109.5(2)         | 110.9      | 109.7(6)                                      | 110.6      | 109.6(6)          | 110.4      |
| $\Delta$                    | 21.97            | 18.39      | 22.73            | 22.86      | 25.13                                         | 21.21      | 19.11             | 18.83      |

### OLED fabrication and characterization:

The ITO coated glass substrates were sequentially cleaned with soap solution, deionized water, acetone, and isopropanol for 10 minutes each and treated with oxygen plasma for 10 minutes. The devices were fabricated by first spincoating the hole-injection layer from PEDOT:PSS solution following annealing at 150 °C for 30 minutes. A thin layer of TFB was deposited by spincoating 2 mg/ml TFB solution on it, annealing at 180°C for 30 minutes, and then cooling the film rapidly. Solutions of compounds **5** and **6** were prepared from chlorobenzene and spin coated on the TFB coated substrates inside a nitrogen gas-filled glove box following annealing at 80 °C for 30 minutes. After that Ca (20 nm)/ Ag (100 nm) were deposited on the active layer as electron-injector in an evaporation chamber at  $\sim 3 \times 10^{-6}$  mbar without exposing the samples to air. Finally, the OLEDs were encapsulated inside the glove box. The J-V-L characteristics of the diodes were measured using Keithley 2400 source meter, 2000 multimeter and a calibrated Si photodetector (from RS components).

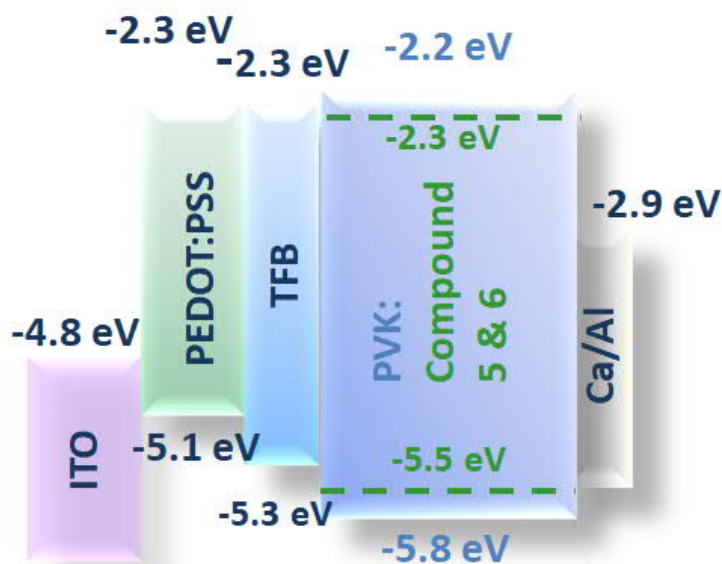

**Fig. S32** Typical OLED structure with energy levels at zero-bias condition.

### Spectral Data for Isolated Compounds (1-7)

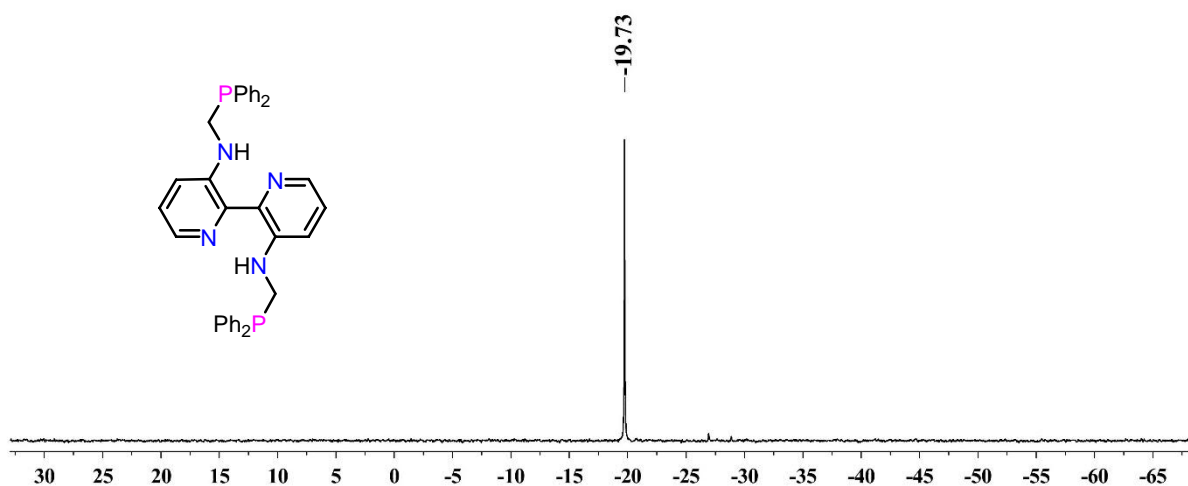

Fig. S33  $^{31}\text{P}\{^1\text{H}\}$  NMR spectrum of compound 1 in  $\text{CDCl}_3$ .

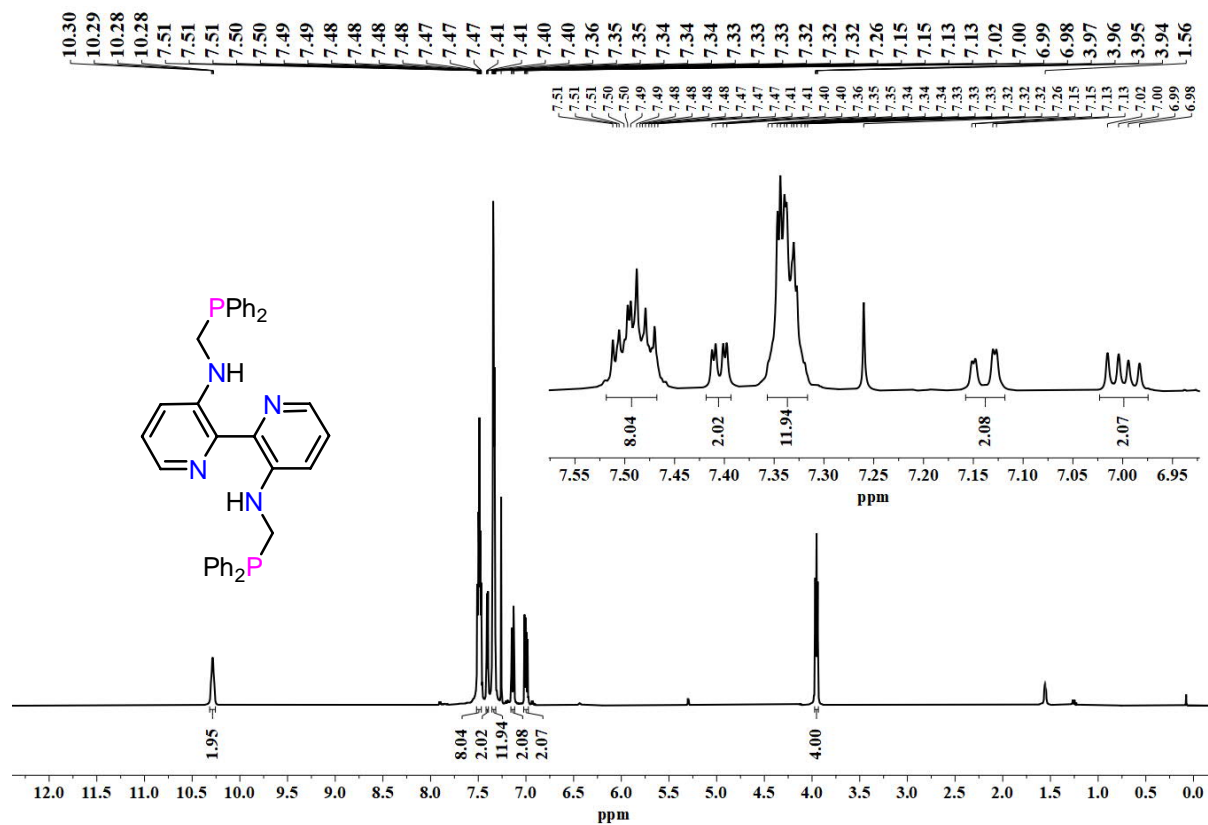

Fig. S34  $^1\text{H}$  NMR spectrum of compound 1 in  $\text{CDCl}_3$ .

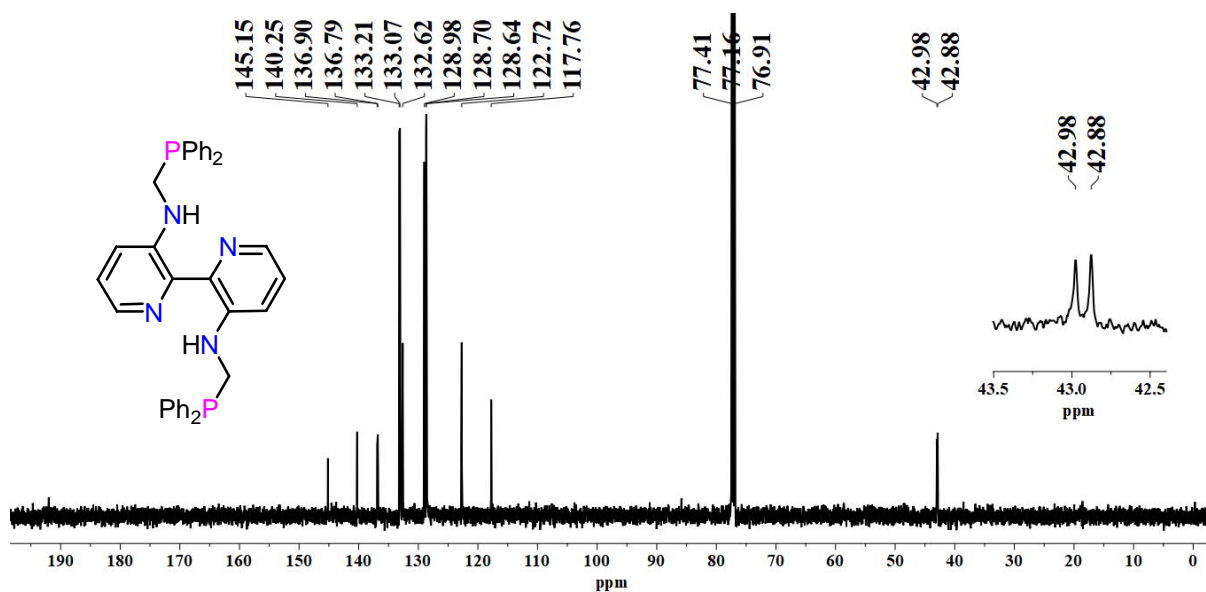

Fig. S35  $^{13}\text{C}\{^1\text{H}\}$  NMR spectrum of compound **1** in  $\text{CDCl}_3$ .

DEPARTMENT OF CHEMISTRY, I.I.T.(B)

Analysis Info

Analysis Name D:\Data\MAY-2017\MSB-DM-PCP.d  
 Method Tune\_pos\_NAF-1000A.m  
 Sample Name MSB-DM-PCP  
 Comment C36H32N4P2

Acquisition Date 5/19/2017 11:02:46 AM

Operator MSB IN  
 Instrument maXis impact 282001.00081

Acquisition Parameter

|             |          |                       |            |                  |           |
|-------------|----------|-----------------------|------------|------------------|-----------|
| Source Type | ESI      | Ion Polarity          | Positive   | Set Nebulizer    | 0.3 Bar   |
| Focus       | Active   | Set Capillary         | 3700 V     | Set Dry Heater   | 180 °C    |
| Scan Begin  | 50 m/z   | Set End Plate Offset  | -500 V     | Set Dry Gas      | 4.0 l/min |
| Scan End    | 1000 m/z | Set Collision Cell RF | 1800.0 Vpp | Set Divert Valve | Source    |

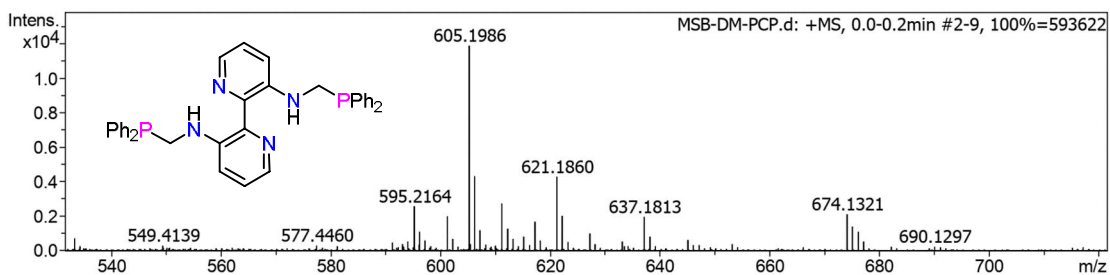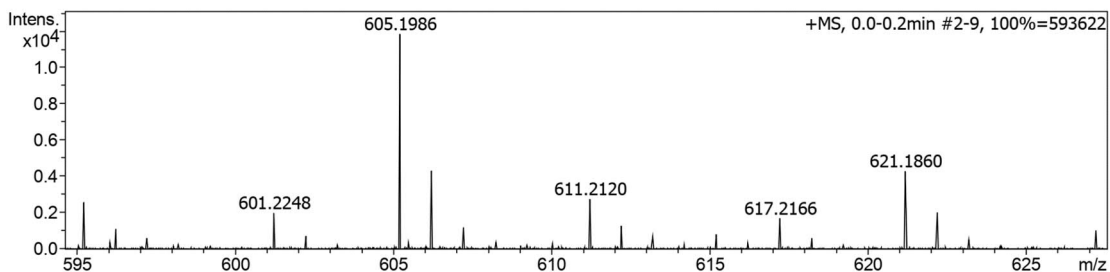

| Meas. m/z | # | Ion Formula  | m/z      | err [ppm] | mSigma | # Sigma | Score  | rdb  | e <sup>-</sup> Conf | N-Rule |
|-----------|---|--------------|----------|-----------|--------|---------|--------|------|---------------------|--------|
| 605.1986  | 1 | C36H32N4NaP2 | 605.1994 | 1.5       | 25.4   | 1       | 100.00 | 23.5 | even                | ok     |

Fig. S36 Mass spectrum of compound **1**.

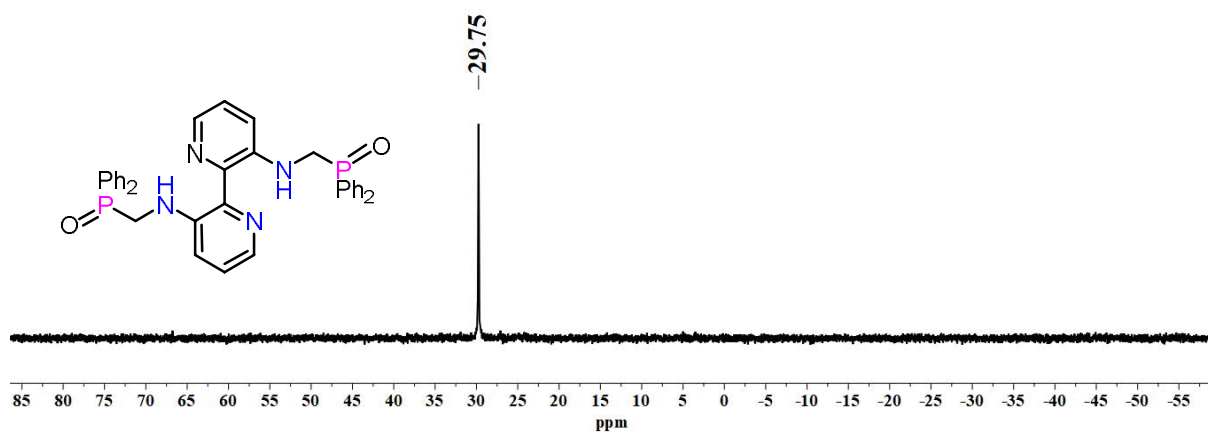

**Fig. S37**  $^{31}\text{P}\{^1\text{H}\}$  NMR spectrum of compound **2** in  $\text{CDCl}_3$ .

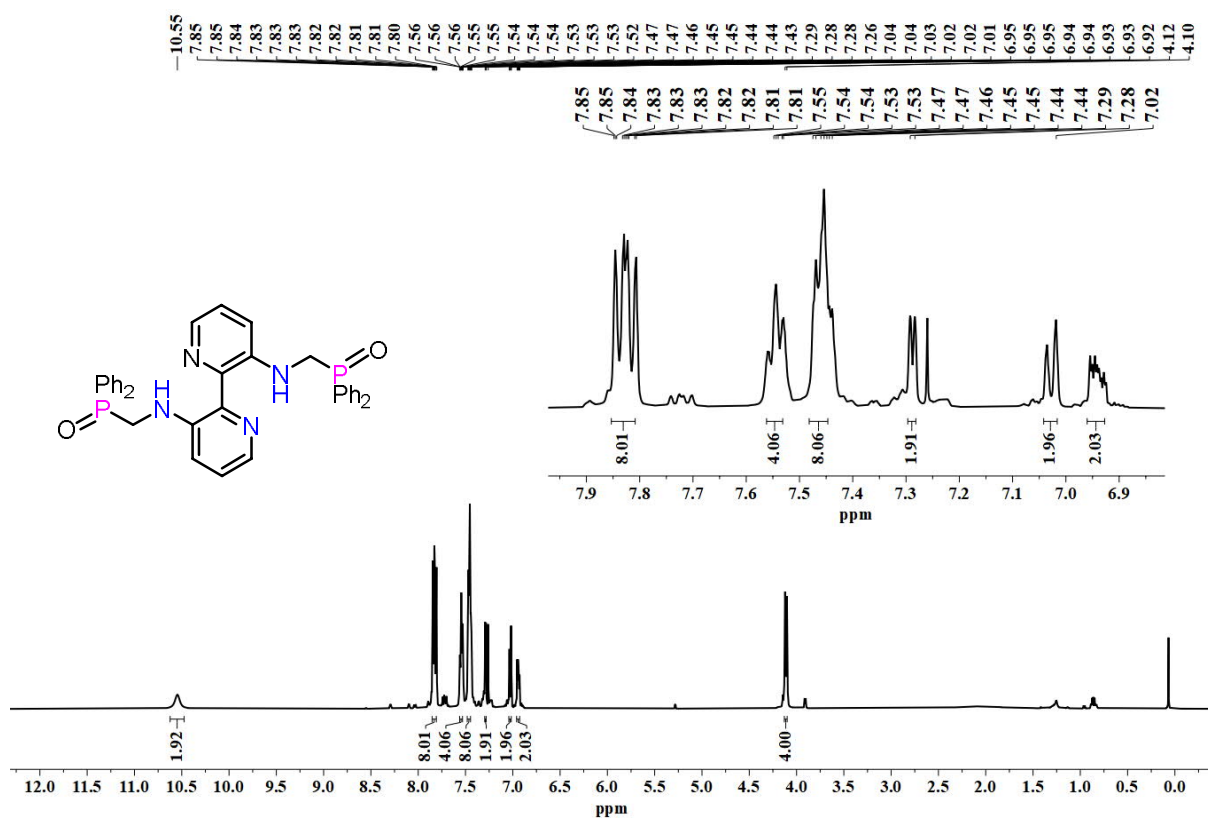

**Fig. S38**  $^1\text{H}$  NMR spectrum of compound **2** in  $\text{CDCl}_3$ .

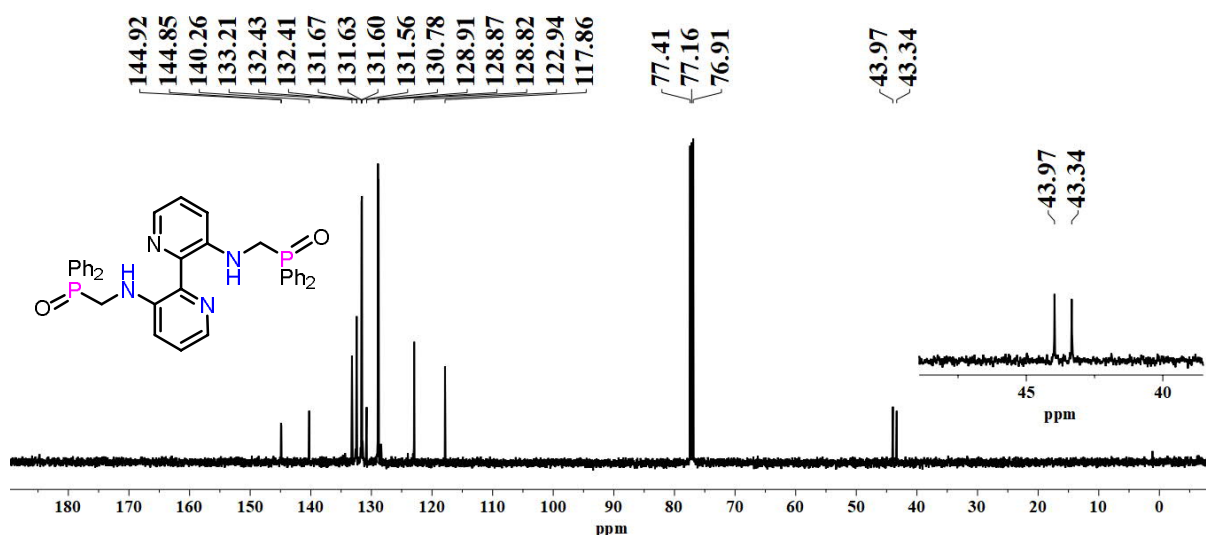

Fig. S39  $^{13}\text{C}\{^1\text{H}\}$  NMR spectrum of compound **2** in  $\text{CDCl}_3$ .

DEPARTMENT OF CHEMISTRY, I.I.T.(B)

Analysis Info

Analysis Name D:\Data\AUG 2017\MSB-RAJ-200A-O-1.d  
 Method Tune\_pos\_NAICSI-1500A.m  
 Sample Name MSB-RAJ-200A-O-1  
 Comment C36H32N4P2O2

Acquisition Date 8/8/2017 10:42:11 PM

Operator MSBIN  
 Instrument maXis impact 282001.00081

Acquisition Parameter

|             |          |                       |            |                  |           |
|-------------|----------|-----------------------|------------|------------------|-----------|
| Source Type | ESI      | Ion Polarity          | Positive   | Set Nebulizer    | 0.3 Bar   |
| Focus       | Active   | Set Capillary         | 3700 V     | Set Dry Heater   | 180 °C    |
| Scan Begin  | 50 m/z   | Set End Plate Offset  | -500 V     | Set Dry Gas      | 4.0 l/min |
| Scan End    | 1500 m/z | Set Collision Cell RF | 1800.0 Vpp | Set Divert Valve | Source    |

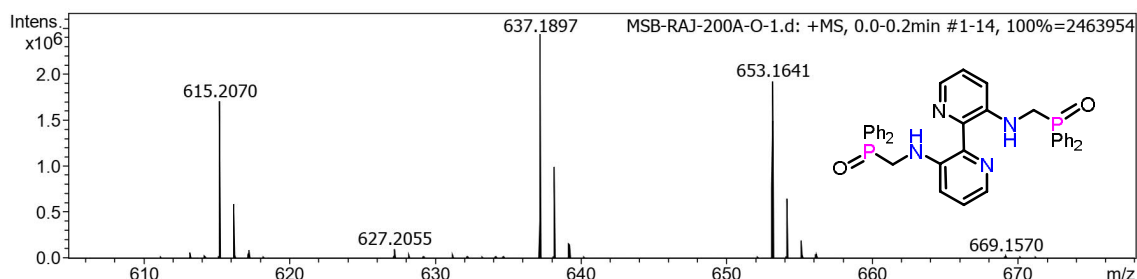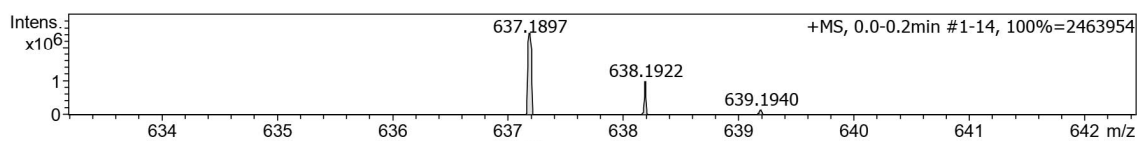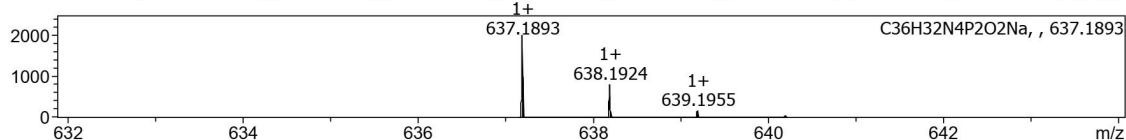

| Meas. m/z | # | Ion Formula    | m/z      | err [ppm] | mSigma | # Sigma | Score  | rdb  | e <sup>-</sup> Conf | N-Rule |
|-----------|---|----------------|----------|-----------|--------|---------|--------|------|---------------------|--------|
| 637.1897  | 1 | C36H32N4NaO2P2 | 637.1893 | -0.6      | 11.7   | 1       | 100.00 | 23.5 | even                | ok     |

Fig. S40 Mass spectrum of compound **2**.

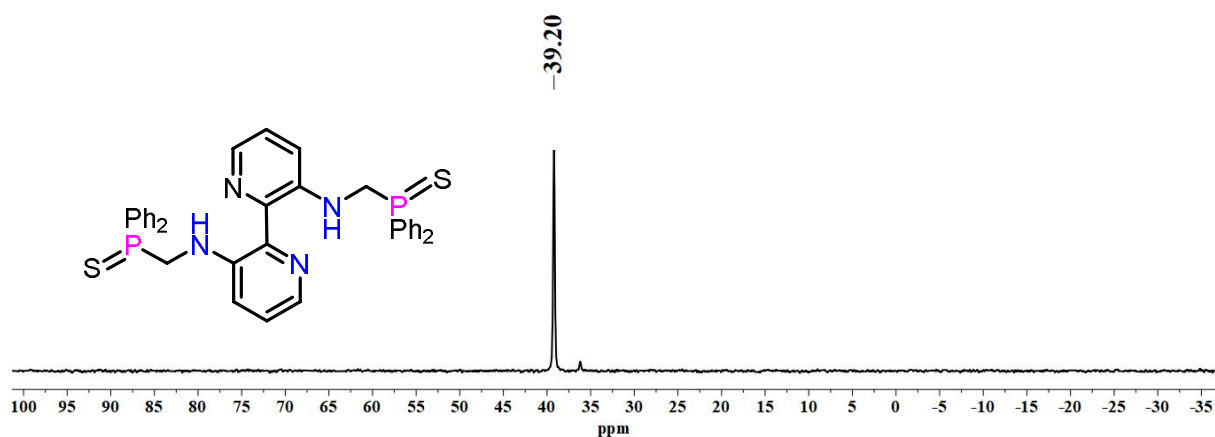

**Fig. S41**  $^{31}\text{P}\{^1\text{H}\}$  NMR spectrum of compound **3** in  $\text{CDCl}_3$ .

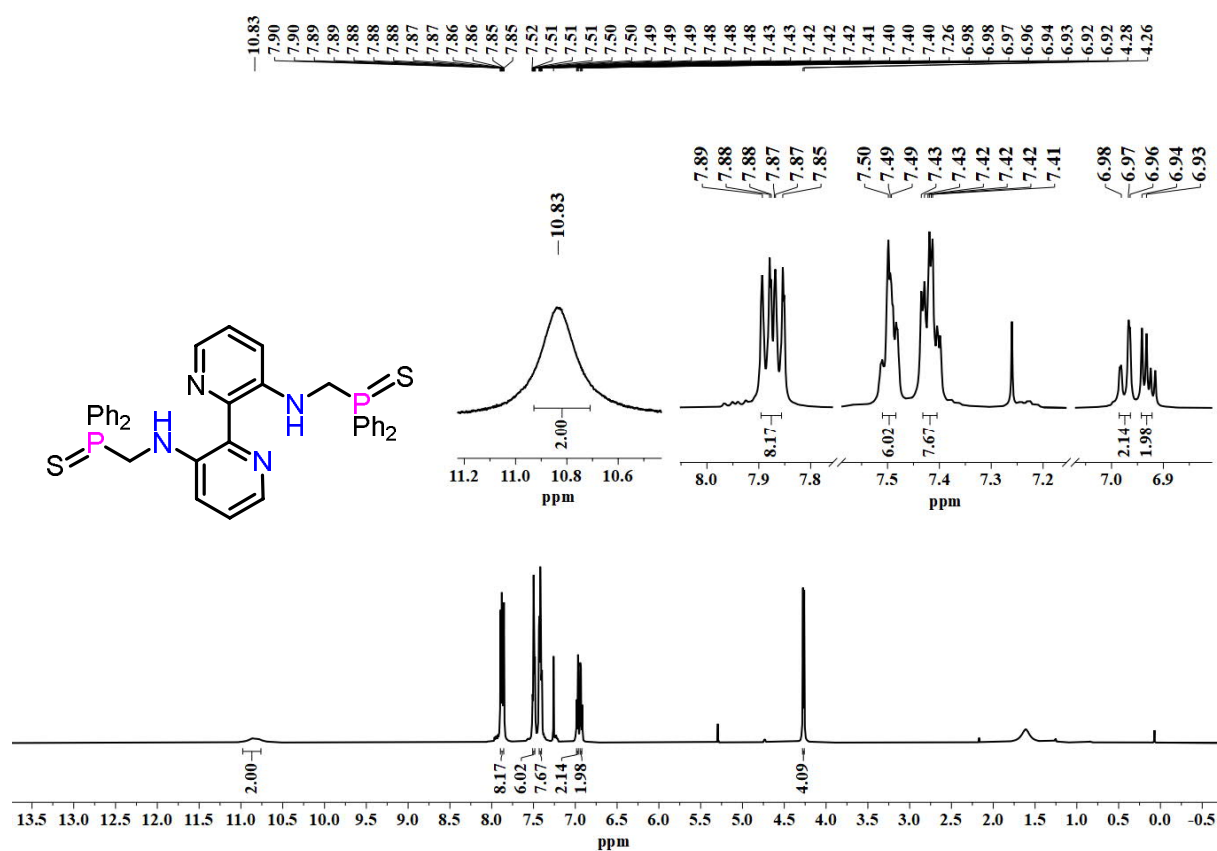

**Fig. S42**  $^1\text{H}$  NMR spectrum of compound **3** in  $\text{CDCl}_3$ .

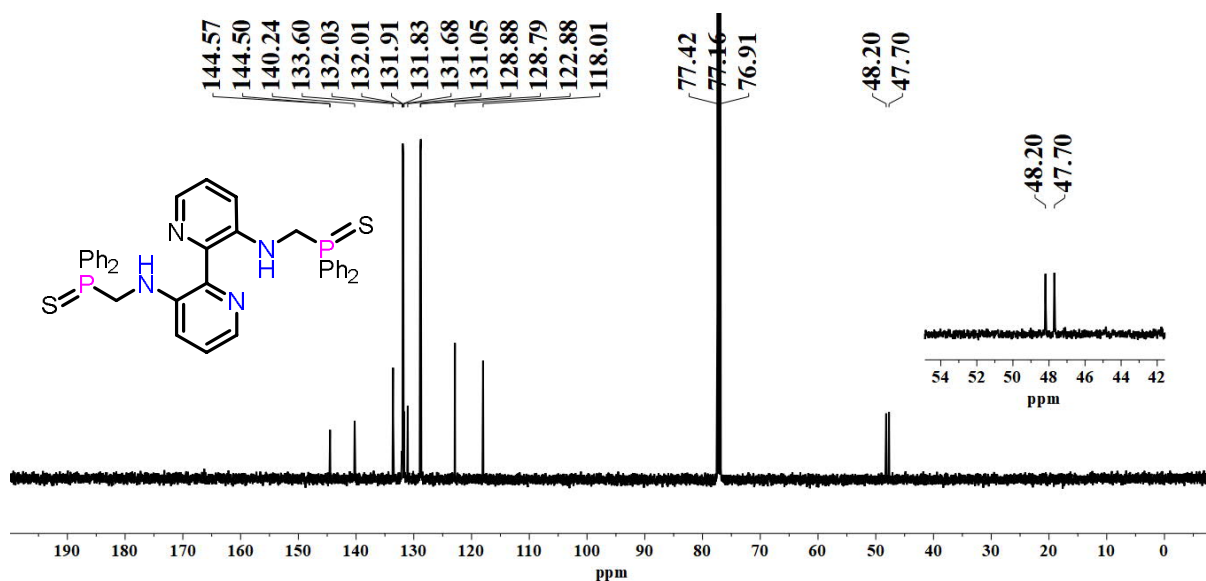

Fig. S43  $^{13}\text{C}\{^1\text{H}\}$  NMR spectrum of compound **3** in  $\text{CDCl}_3$ .

DEPARTMENT OF CHEMISTRY, I.I.T.(B)

Analysis Info

Analysis Name D:\Data\AUG 2017\MSB-RAJ-200A-S.d  
 Method Tune\_pos\_NAICSI-1500A.m  
 Sample Name MSB-RAJ-200A-S  
 Comment C36H32N4P2S2

Acquisition Date 8/8/2017 10:30:46 PM

Operator MSBIN  
 Instrument maXis impact 282001.00081

Acquisition Parameter

|             |          |                       |            |                  |           |
|-------------|----------|-----------------------|------------|------------------|-----------|
| Source Type | ESI      | Ion Polarity          | Positive   | Set Nebulizer    | 0.3 Bar   |
| Focus       | Active   | Set Capillary         | 3700 V     | Set Dry Heater   | 180 °C    |
| Scan Begin  | 50 m/z   | Set End Plate Offset  | -500 V     | Set Dry Gas      | 4.0 l/min |
| Scan End    | 1500 m/z | Set Collision Cell RF | 1800.0 Vpp | Set Divert Valve | Source    |

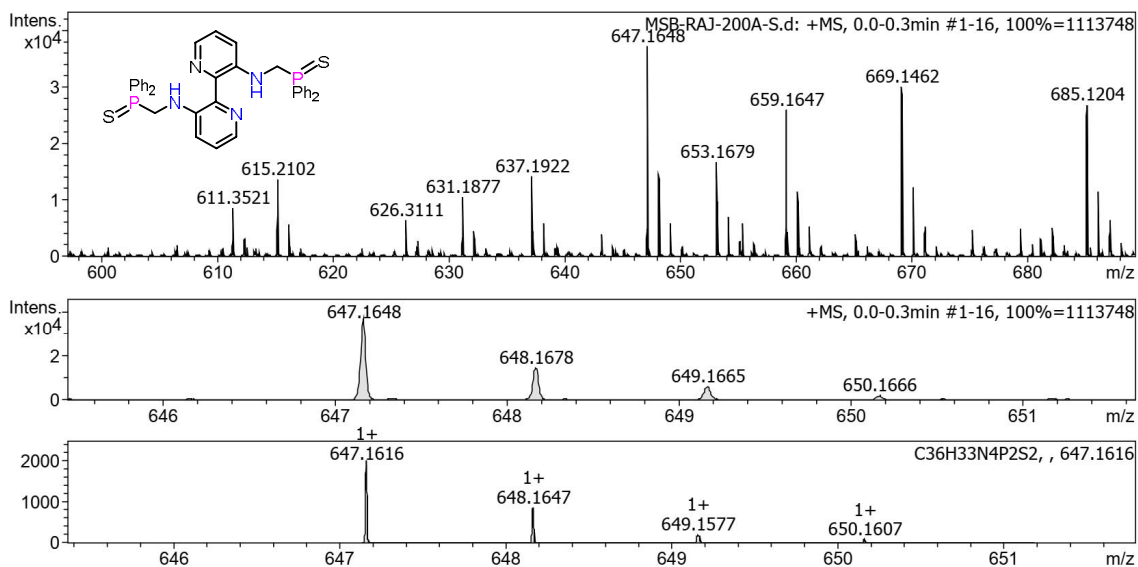

| Meas. m/z | # | Ion Formula  | m/z      | err [ppm] | mSigma | # Sigma | Score  | rdb  | e <sup>-</sup> Conf | N-Rule |
|-----------|---|--------------|----------|-----------|--------|---------|--------|------|---------------------|--------|
| 647.1648  | 1 | C36H33N4P2S2 | 647.1616 | 4.9       | 15.9   | 1       | 100.00 | 23.5 | even                | ok     |

Fig. S44 Mass spectrum of compound **3**.



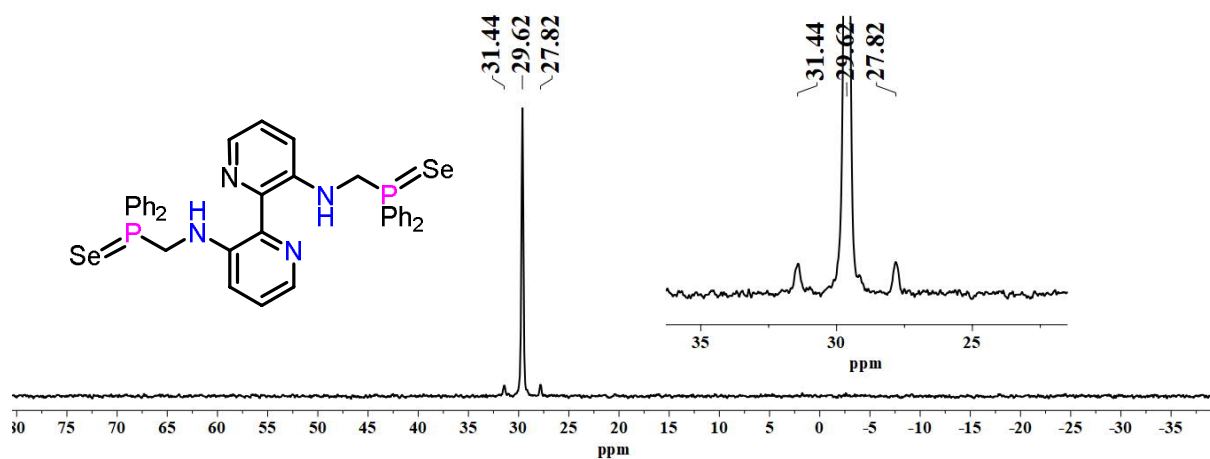

Fig. S45  $^{31}\text{P}\{^1\text{H}\}$  NMR spectrum of compound 4 in  $\text{CDCl}_3$ .

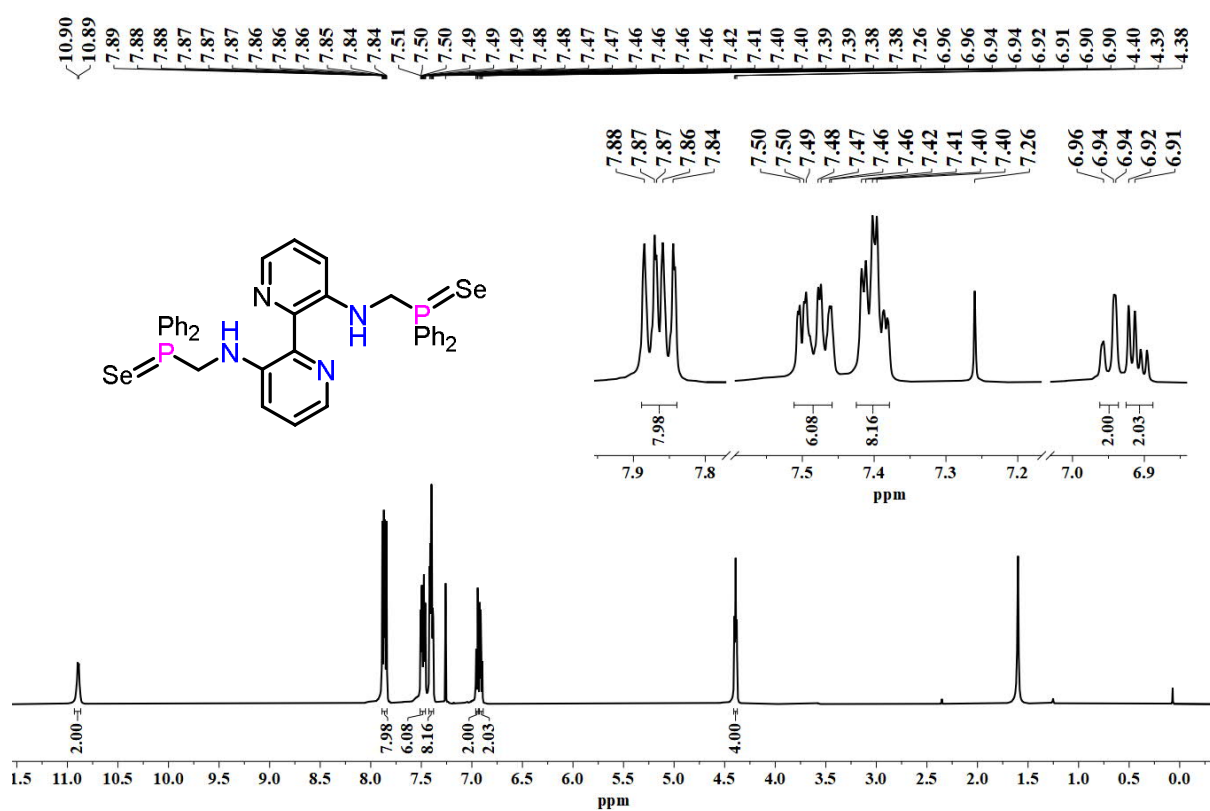

Fig. S46  $^1\text{H}$  NMR spectrum of compound 4 in  $\text{CDCl}_3$ .

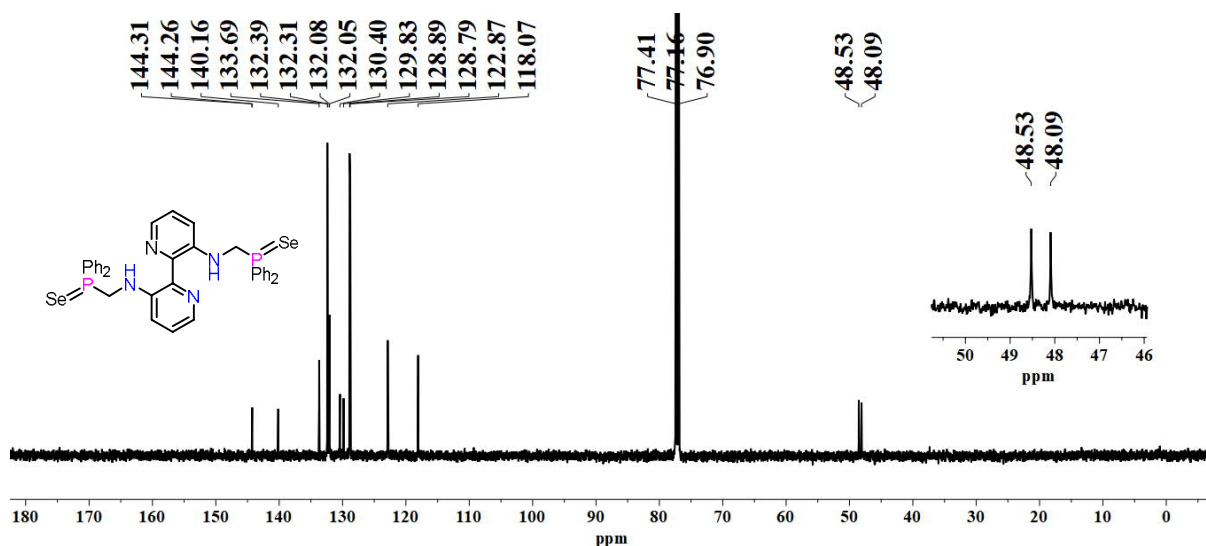

Fig. S47  $^{13}\text{C}\{^1\text{H}\}$  NMR spectrum of compound **4** in  $\text{CDCl}_3$ .

DEPARTMENT OF CHEMISTRY, I.I.T.(B)

Analysis Info

Analysis Name D:\Data\JUNE 2021\MSB-DM-L2Se-B.d  
 Method NaICSI\_pos\_1500.m  
 Sample Name MSB-DM-L2Se-B  
 Comment C36H32N4P2Se2

Acquisition Date 6/29/2021 12:36:15 PM

Operator GKL-IN  
 Instrument maXis impact 282001.00081

Acquisition Parameter

|             |            |                      |          |                  |           |
|-------------|------------|----------------------|----------|------------------|-----------|
| Source Type | ESI        | Ion Polarity         | Positive | Set Nebulizer    | 0.3 Bar   |
| Focus       | Not active | Set Capillary        | 3700 V   | Set Dry Heater   | 180 °C    |
| Scan Begin  | 50 m/z     | Set End Plate Offset | -500 V   | Set Dry Gas      | 4.0 l/min |
| Scan End    | 1500 m/z   | Set Charging Voltage | 2000 V   | Set Divert Valve | Source    |
|             |            | Set Corona           | 0 nA     | Set APCI Heater  | 0 °C      |

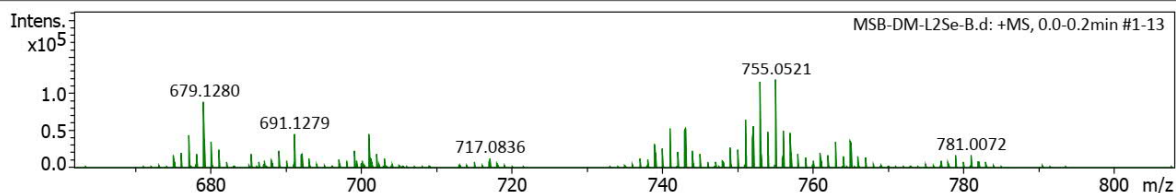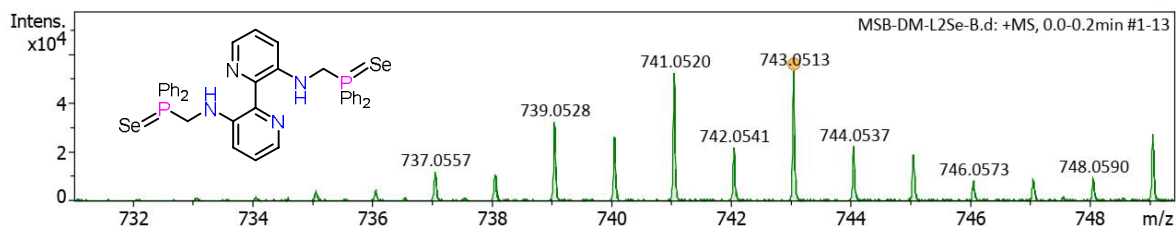

| Meas. m/z | # | Ion Formula   | m/z      | err [ppm] | mSigma | # mSigma | Score  | rdb  | e <sup>-</sup> Conf | N-Rule |
|-----------|---|---------------|----------|-----------|--------|----------|--------|------|---------------------|--------|
| 743.0513  | 1 | C36H33N4P2Se2 | 743.0505 | -0.0      | 58.8   | 1        | 100.00 | 30.0 | even                | ok     |

Fig. S48 Mass spectrum of compound **4**.

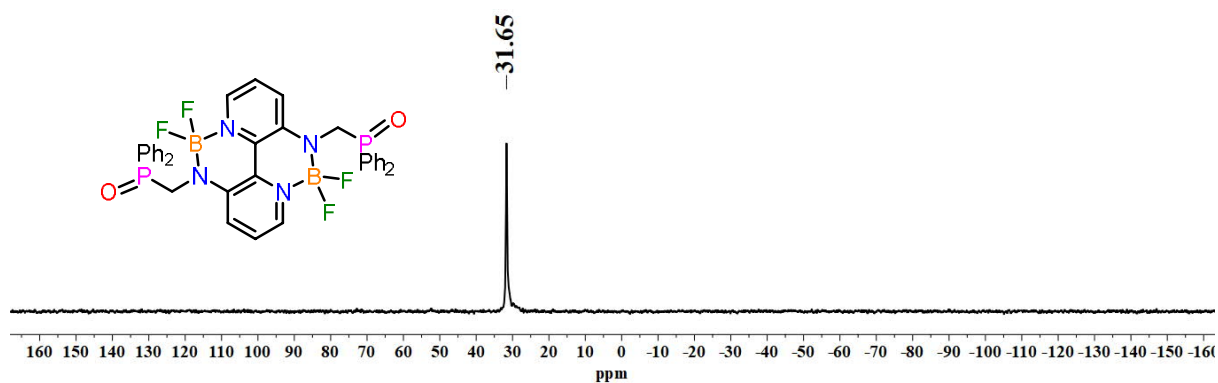

**Fig. S49**  $^{31}\text{P}\{^1\text{H}\}$  NMR spectrum of compound 5 in  $\text{CDCl}_3$ .

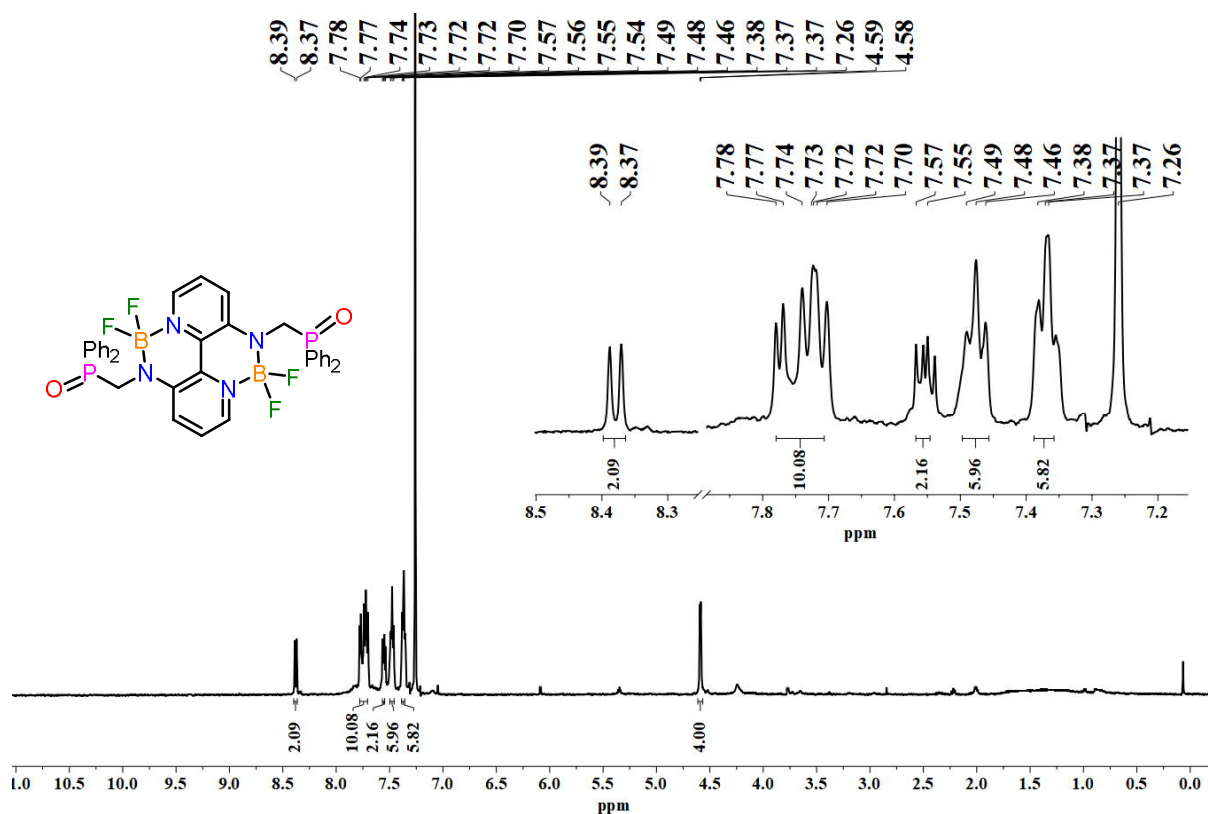

**Fig. S50**  $^1\text{H}$  NMR spectrum of compound 5 in  $\text{CDCl}_3$ .

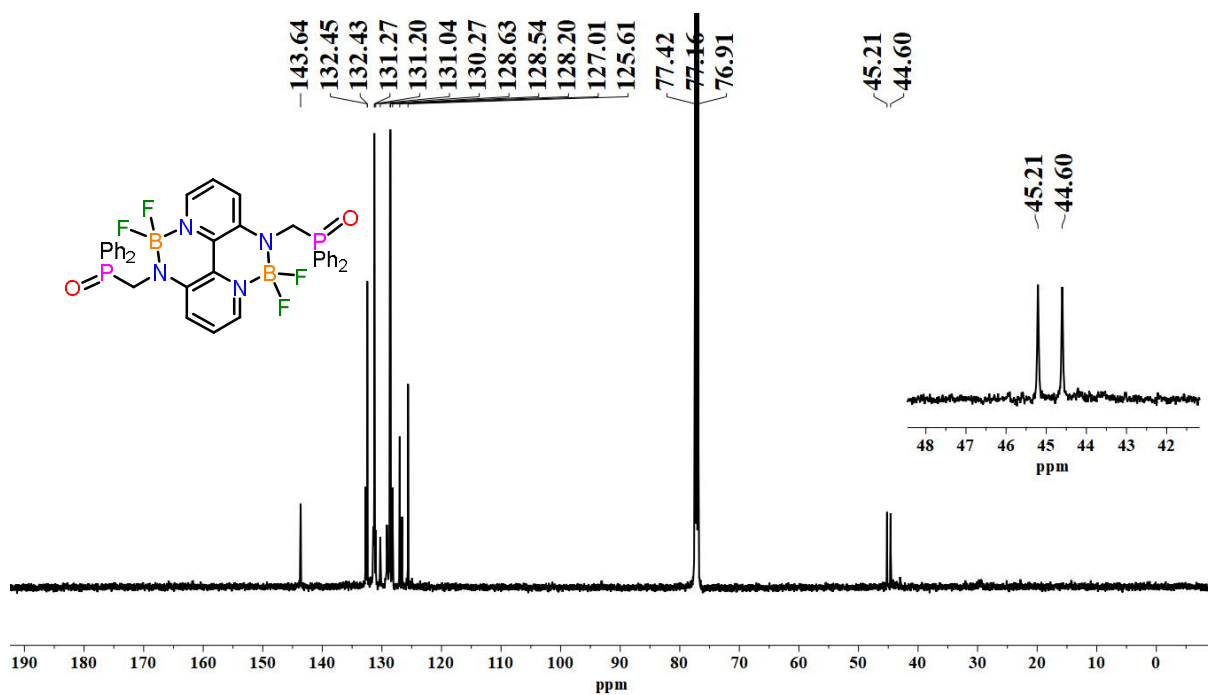

Fig. S51  $^{13}\text{C}\{^1\text{H}\}$  NMR spectrum of compound 5 in  $\text{CDCl}_3$ .

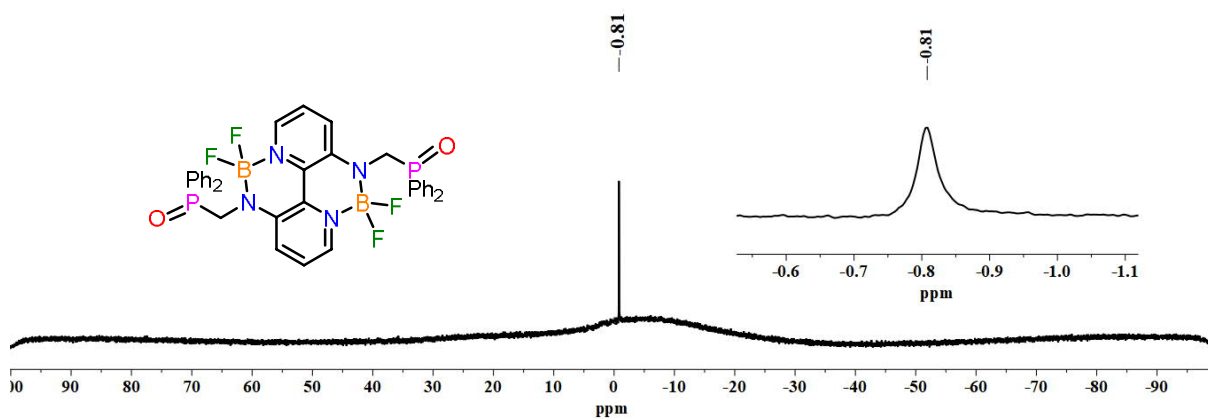

Fig. S52  $^{11}\text{B}\{^1\text{H}\}$  NMR spectrum of compound 5 in  $\text{CDCl}_3$ .

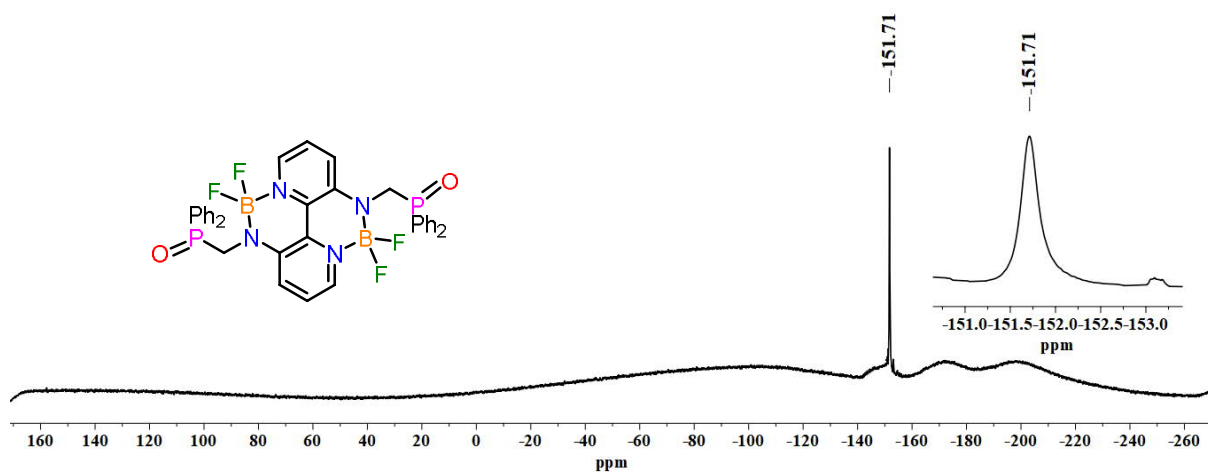

Fig. S53  $^{19}\text{F}$  NMR spectrum of compound 5 in  $\text{CDCl}_3$ .

DEPARTMENT OF CHEMISTRY, I.I.T.(B)

Analysis Info

Analysis Name D:\Data\AUG-19\DM-L2O-BF4.d  
 Method Tune\_pos\_NAICSI-2000A.m  
 Sample Name DM-L2O-BF4  
 Comment C36H30B2F4N4P2O2

Acquisition Date 8/6/2019 1:16:27 AM  
 Operator INN IN  
 Instrument maXis impact 282001.00081

Acquisition Parameter

|             |          |                       |            |                  |           |
|-------------|----------|-----------------------|------------|------------------|-----------|
| Source Type | ESI      | Ion Polarity          | Positive   | Set Nebulizer    | 0.3 Bar   |
| Focus       | Active   | Set Capillary         | 3700 V     | Set Dry Heater   | 180 °C    |
| Scan Begin  | 50 m/z   | Set End Plate Offset  | -500 V     | Set Dry Gas      | 4.0 l/min |
| Scan End    | 2000 m/z | Set Collision Cell RF | 2100.0 Vpp | Set Divert Valve | Source    |

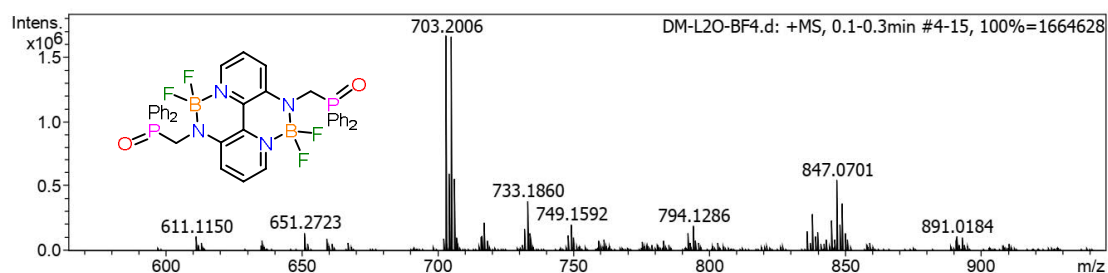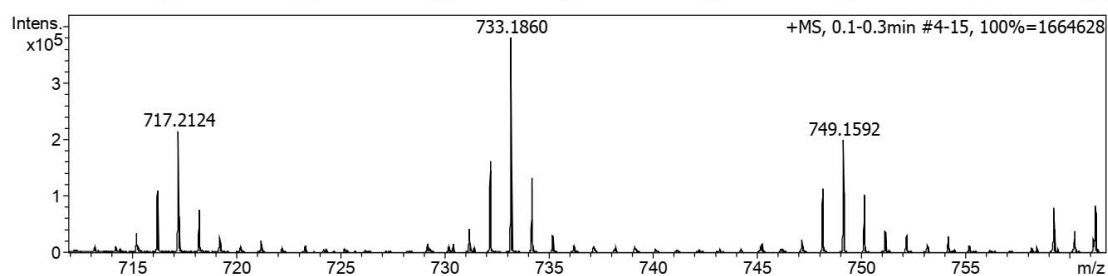

| Meas. m/z | # | Ion Formula        | m/z      | err [ppm] | mSigma | # Sigma | Score  | rdb  | e <sup>-</sup> Conf | N-Rule |
|-----------|---|--------------------|----------|-----------|--------|---------|--------|------|---------------------|--------|
| 733.1860  | 1 | C36H30B2F4N4NaO2P2 | 733.1870 | -0.2      | 28.1   | 1       | 100.00 | 23.5 | even                | ok     |

Fig. S54 Mass spectrum of compound 5.

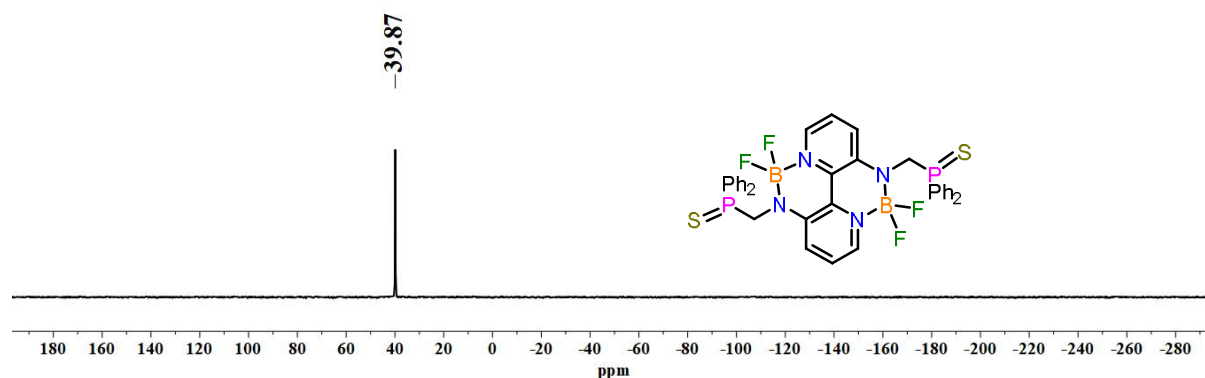

Fig. S55 <sup>31</sup>P{<sup>1</sup>H} NMR spectrum of compound 6 in CDCl<sub>3</sub>.

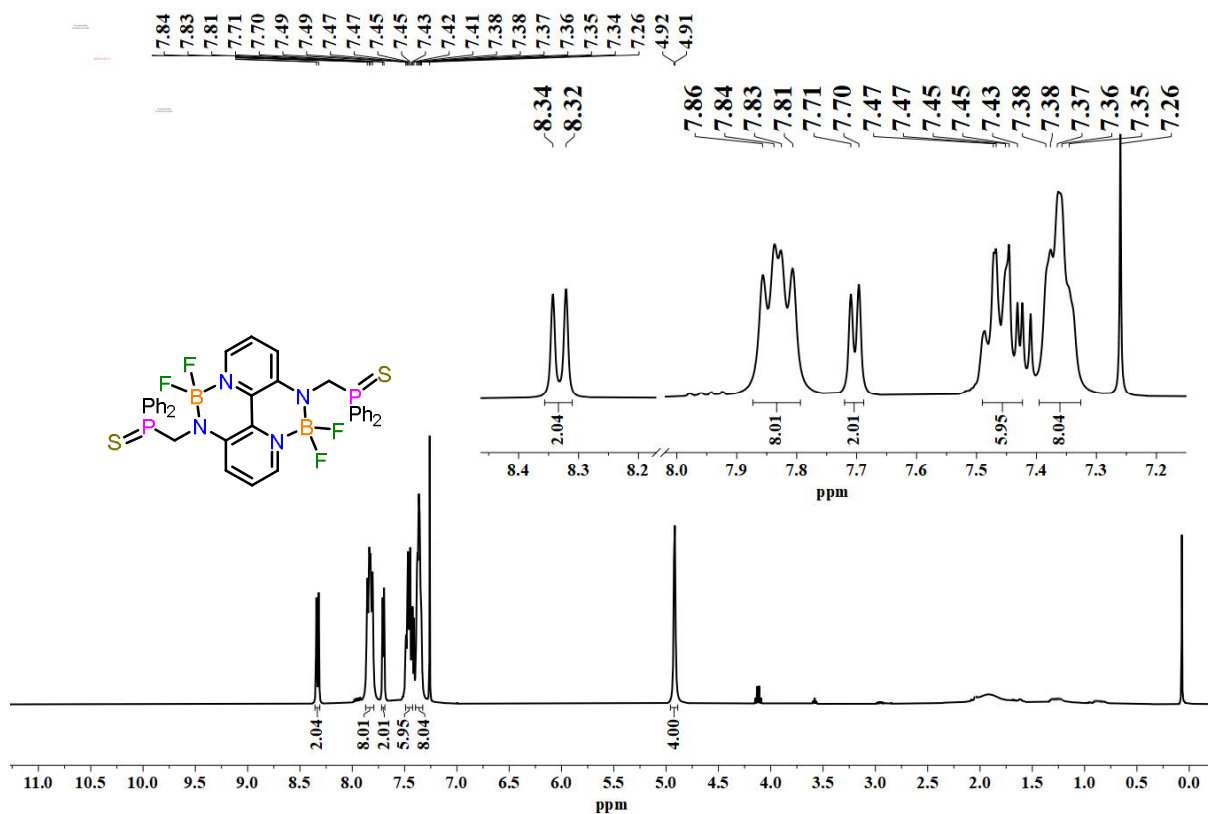

Fig. S56 <sup>1</sup>H NMR spectrum of compound 6 in CDCl<sub>3</sub>.

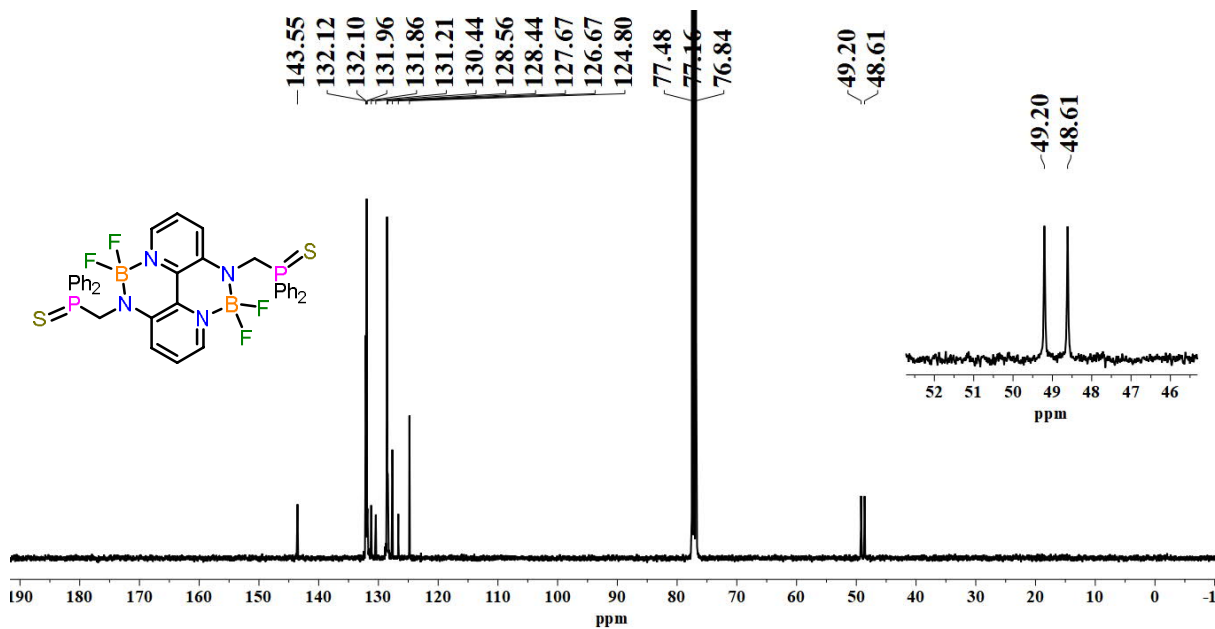

Fig. S57 <sup>13</sup>C{<sup>1</sup>H} NMR spectrum of compound 6 in CDCl<sub>3</sub>.

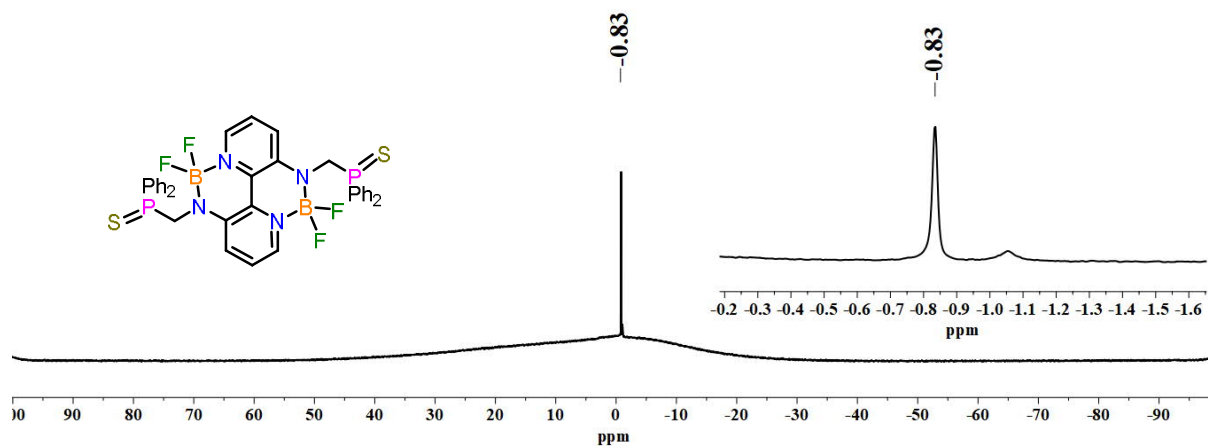

**Fig. S58**  $^{11}\text{B}$   $\{^1\text{H}\}$  NMR spectrum of compound **6** in  $\text{CDCl}_3$ .

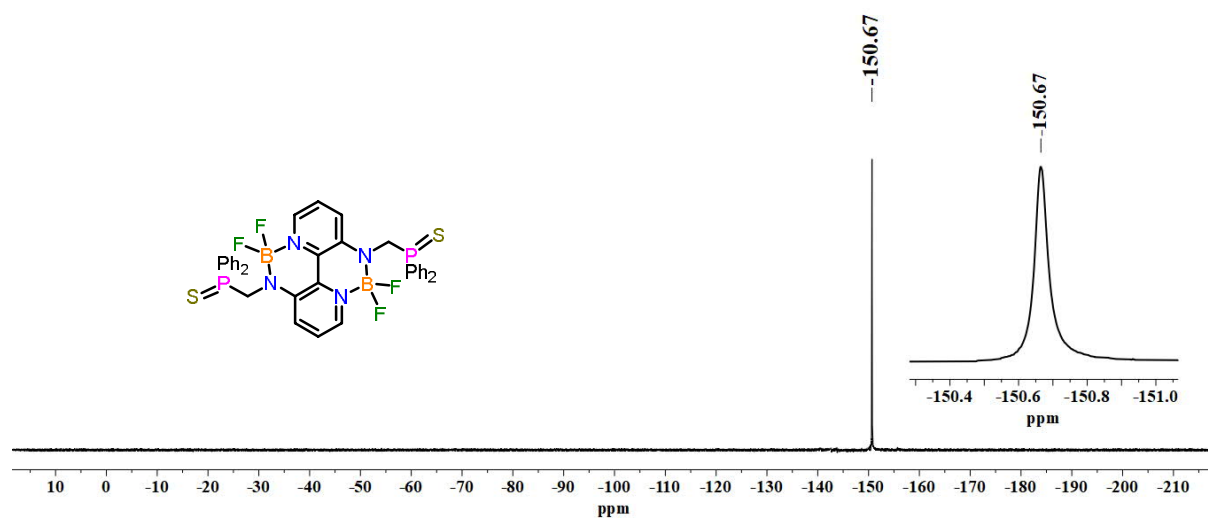

**Fig. S59**  $^{19}\text{F}$  NMR spectrum of compound **6** in  $\text{CDCl}_3$ .

DEPARTMENT OF CHEMISTRY, I.I.T.(B)

Analysis Info

Analysis Name D:\Data\AUG-19\MSB-DM-6-A.d  
 Method Tune\_pos\_NAICSI-1000a.m  
 Sample Name MSB-DM-6-A  
 Comment C36H30N4B2F4S2P2

Acquisition Date 8/8/2019 12:13:16 PM

Operator PG SRD IN  
 Instrument maXis impact 282001.00081

Acquisition Parameter

|             |          |                       |            |                  |           |
|-------------|----------|-----------------------|------------|------------------|-----------|
| Source Type | ESI      | Ion Polarity          | Positive   | Set Nebulizer    | 0.3 Bar   |
| Focus       | Active   | Set Capillary         | 4500 V     | Set Dry Heater   | 180 °C    |
| Scan Begin  | 50 m/z   | Set End Plate Offset  | -500 V     | Set Dry Gas      | 4.0 l/min |
| Scan End    | 1000 m/z | Set Collision Cell RF | 1200.0 Vpp | Set Divert Valve | Source    |

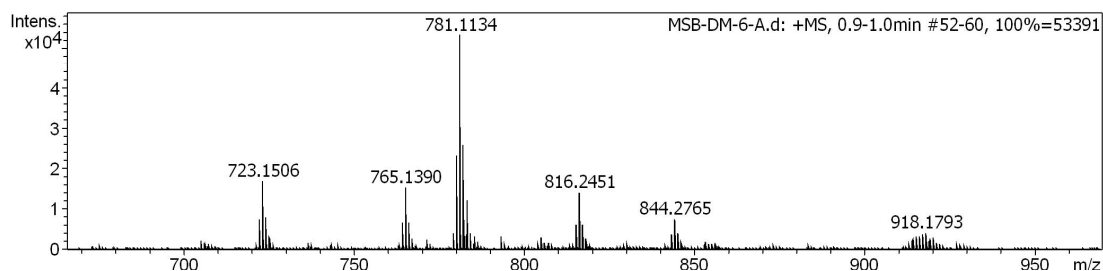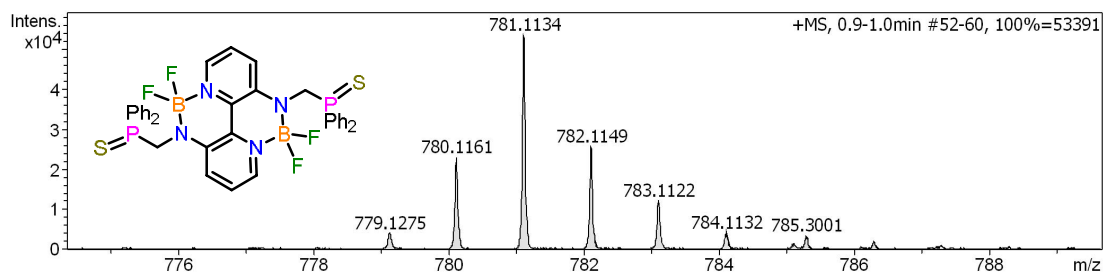

| Meas. m/z | # | Ion Formula       | m/z      | err [ppm] | mSigma | # Sigma | Score  | rdb  | e <sup>-</sup> Conf | N-Rule |
|-----------|---|-------------------|----------|-----------|--------|---------|--------|------|---------------------|--------|
| 781.1134  | 1 | C36H30B2F4KN4P2S2 | 781.1153 | 0.9       | 13.9   | 1       | 100.00 | 23.5 | even                | ok     |

Fig. S60 Mass spectrum of compound 6.

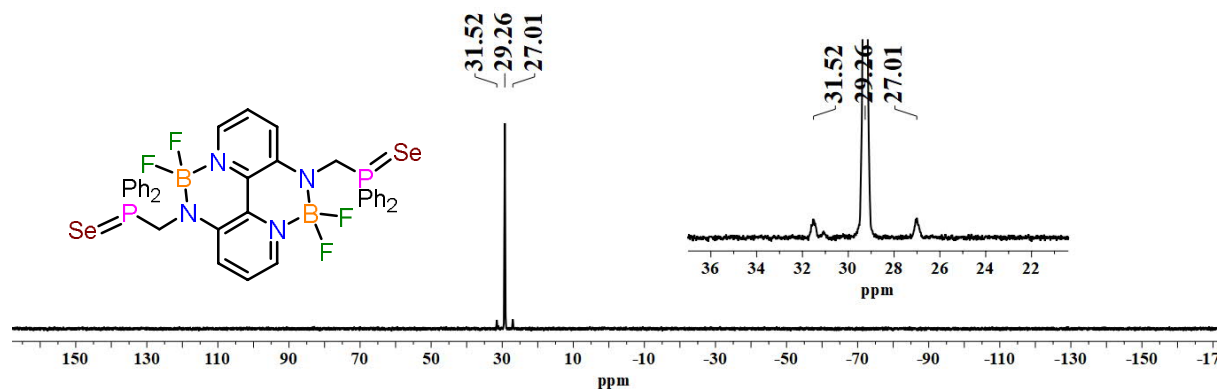

Fig. S61 <sup>31</sup>P{<sup>1</sup>H} NMR spectrum of compound 7 in CDCl<sub>3</sub>.



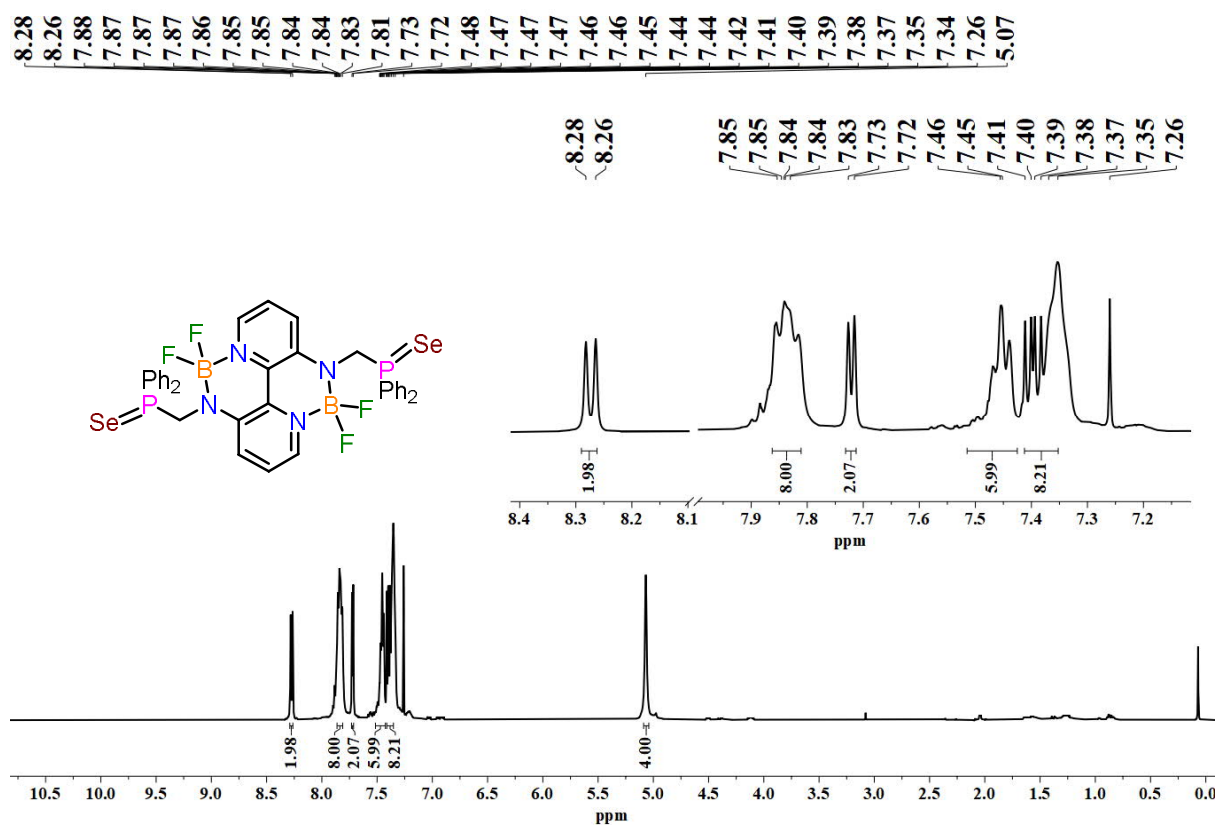

Fig. S62  $^1\text{H}$  NMR spectrum of compound 7 in  $\text{CDCl}_3$ .

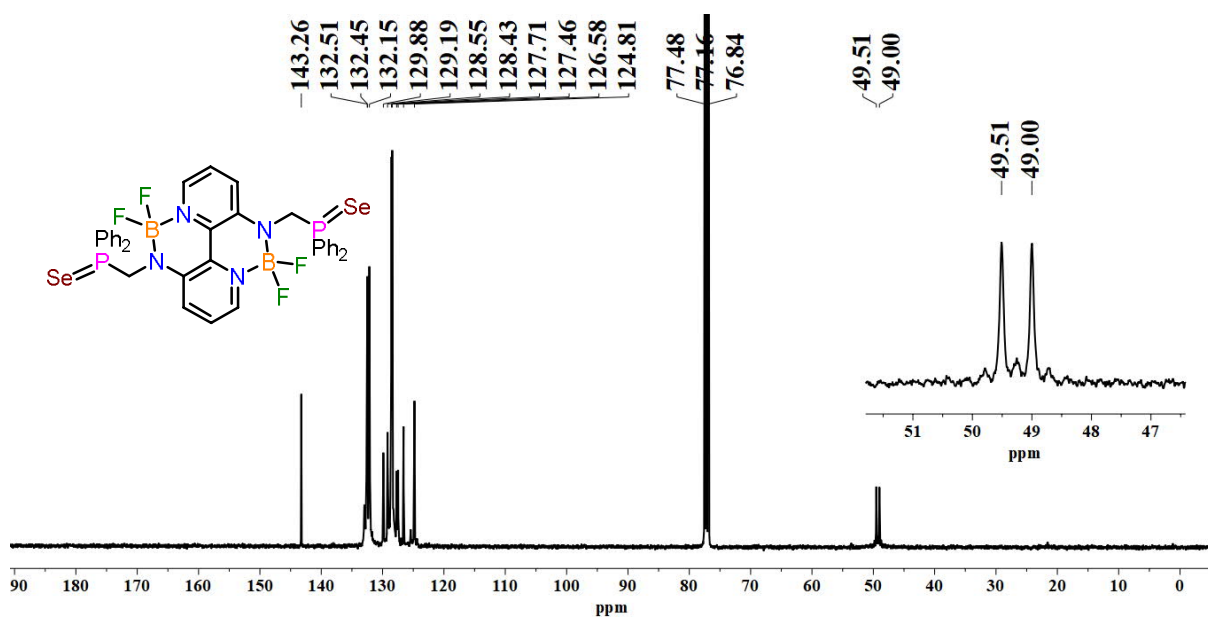

Fig. S63  $^{13}\text{C}\{^1\text{H}\}$  NMR spectrum of compound 7 in  $\text{CDCl}_3$ .

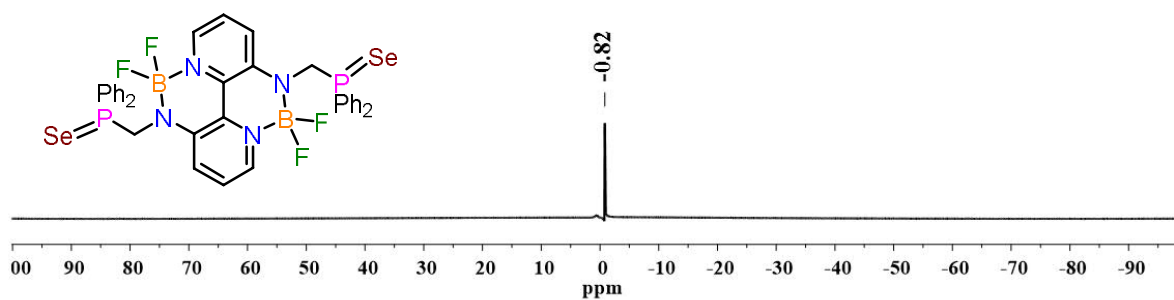

**Fig. S64**  $^{11}\text{B}\{^1\text{H}\}$  NMR spectrum of compound **7** in  $\text{CDCl}_3$ .

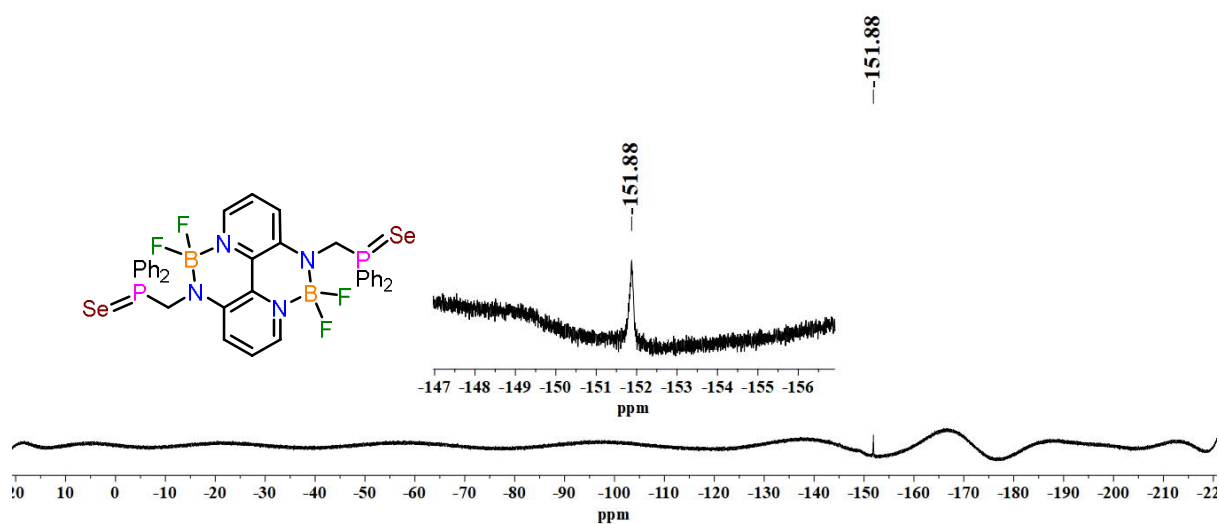

**Fig. S65**  $^{19}\text{F}$  NMR spectrum of compound **7** in  $\text{CDCl}_3$ .

**DEPARTMENT OF CHEMISTRY, I.I.T.(B)**

**Analysis Info**

Analysis Name D:\Data\JUNE-19\MSB-DM-L2SE-BF2.d  
 Method Tune\_pos\_1500\_NAF-22052019.m  
 Sample Name MSB-DM-L2SE-BF2  
 Comment C36H30N4B2F4Se2

Acquisition Date 6/11/2019 12:10:13 PM

Operator INN-IN  
 Instrument maXis impact 282001.00081

**Acquisition Parameter**

|             |          |                       |            |                  |           |
|-------------|----------|-----------------------|------------|------------------|-----------|
| Source Type | ESI      | Ion Polarity          | Positive   | Set Nebulizer    | 0.4 Bar   |
| Focus       | Active   | Set Capillary         | 4000 V     | Set Dry Heater   | 180 °C    |
| Scan Begin  | 50 m/z   | Set End Plate Offset  | -500 V     | Set Dry Gas      | 4.0 l/min |
| Scan End    | 1500 m/z | Set Collision Cell RF | 1800.0 Vpp | Set Divert Valve | Source    |

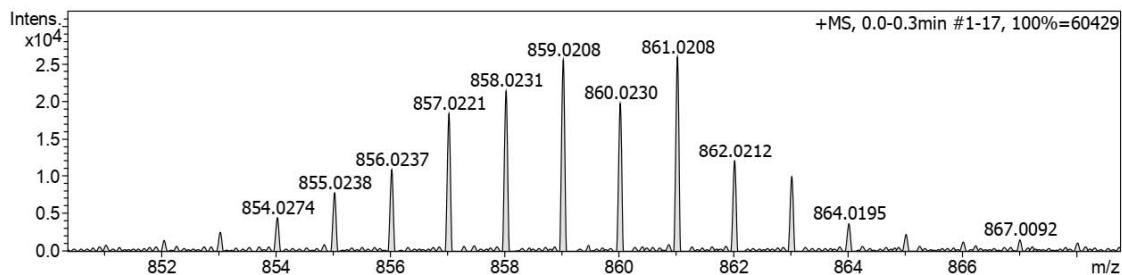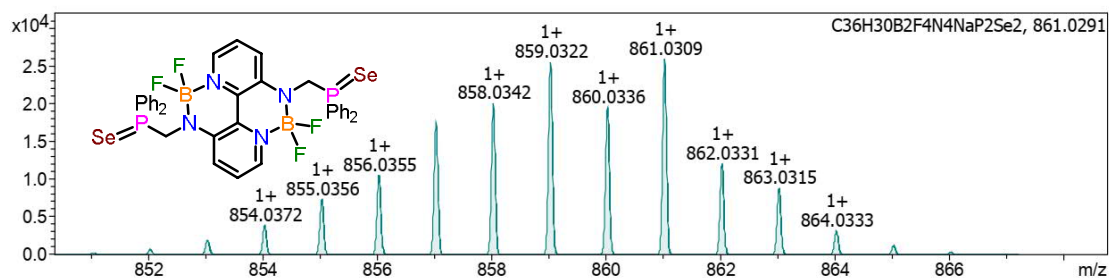

| Meas. m/z | # | Ion Formula         | m/z      | err [ppm] | mSigma | # Sigma | Score  | rdb  | e <sup>-</sup> Conf | N-Rule |
|-----------|---|---------------------|----------|-----------|--------|---------|--------|------|---------------------|--------|
| 861.0208  | 1 | C36H30B2F4N4NaP2Se2 | 861.0310 | 9.6       | 26.5   | 1       | 100.00 | 23.5 | even                | ok     |

**Fig. S66** Mass spectrum of compound 7.

**Optimized Cartesian Coordinates of compounds 5-7 (TD-DFT; Gaussian 09; B3LYP/TZVP).**

**Compound 5**

|   |              |              |              |
|---|--------------|--------------|--------------|
| P | -4.544809000 | 0.419912000  | 0.807700000  |
| P | 4.544833000  | 0.419793000  | -0.807791000 |
| F | -2.237026000 | -3.542330000 | -1.201148000 |
| F | -3.049017000 | -1.720595000 | -2.313527000 |
| F | 3.049178000  | -1.720433000 | 2.313768000  |
| F | 2.236873000  | -3.542193000 | 1.201649000  |

|   |              |              |              |
|---|--------------|--------------|--------------|
| O | -4.368821000 | 0.709898000  | 2.285965000  |
| O | 4.368878000  | 0.709550000  | -2.286100000 |
| N | 0.708851000  | -1.742558000 | 1.670116000  |
| N | -2.541070000 | -1.474264000 | 0.030515000  |
| N | 2.541237000  | -1.474361000 | -0.030325000 |
| N | -0.708687000 | -1.742995000 | -1.669853000 |
| C | -1.607241000 | -1.458925000 | 1.022224000  |
| C | 0.229137000  | -1.670186000 | -0.687885000 |
| C | -0.228965000 | -1.669980000 | 0.688121000  |
| C | 1.607422000  | -1.459260000 | -1.022046000 |
| C | -1.908185000 | -1.225885000 | 2.386570000  |
| H | -2.920110000 | -0.947851000 | 2.681227000  |
| C | -6.319774000 | 0.401985000  | 0.351928000  |
| C | -0.400057000 | -1.573406000 | -2.965154000 |
| H | -1.224690000 | -1.659751000 | -3.670259000 |
| C | -0.907422000 | -1.291670000 | 3.345591000  |
| H | -1.137967000 | -1.126701000 | 4.398982000  |
| C | 0.400235000  | -1.572585000 | 2.965367000  |
| H | 1.224870000  | -1.658769000 | 3.670490000  |
| C | 1.908371000  | -1.226579000 | -2.386453000 |
| H | 2.920301000  | -0.948626000 | -2.681172000 |
| C | -3.953101000 | -1.282445000 | 0.308281000  |
| H | -4.319478000 | -1.938763000 | 1.120153000  |
| H | -4.509264000 | -1.559160000 | -0.595988000 |

|   |              |              |              |
|---|--------------|--------------|--------------|
| C | -6.781794000 | 0.228409000  | -0.963669000 |
| H | -6.079079000 | 0.107899000  | -1.791864000 |
| C | 0.907609000  | -1.292628000 | -3.345456000 |
| H | 1.138151000  | -1.127967000 | -4.398895000 |
| C | 3.423257000  | 1.461761000  | 1.607235000  |
| H | 3.675727000  | 0.524018000  | 2.105118000  |
| C | 3.953269000  | -1.282511000 | -0.308086000 |
| H | 4.319717000  | -1.938998000 | -1.119790000 |
| H | 4.509417000  | -1.559007000 | 0.596263000  |
| C | -3.696127000 | 1.650232000  | -0.241775000 |
| C | -7.243393000 | 0.567026000  | 1.395749000  |
| H | -6.871567000 | 0.705124000  | 2.413395000  |
| C | -3.315531000 | 2.848320000  | 0.384820000  |
| H | -3.513536000 | 2.976052000  | 1.451337000  |
| C | -8.615451000 | 0.557434000  | 1.126478000  |
| H | -9.330186000 | 0.687207000  | 1.943081000  |
| C | -8.153404000 | 0.218607000  | -1.228232000 |
| H | -8.507314000 | 0.084384000  | -2.253319000 |
| C | 2.791518000  | 2.473169000  | 2.336839000  |
| H | 2.577447000  | 2.321594000  | 3.397712000  |
| C | 3.695958000  | 1.650172000  | 0.241448000  |
| C | 2.425546000  | 3.670195000  | 1.711678000  |
| H | 1.930658000  | 4.457116000  | 2.286568000  |
| C | -9.070969000 | 0.382553000  | -0.183699000 |

|   |               |              |              |
|---|---------------|--------------|--------------|
| H | -10.143530000 | 0.374965000  | -0.393791000 |
| C | 3.315174000   | 2.848081000  | -0.385370000 |
| H | 3.513100000   | 2.975592000  | -1.451928000 |
| C | -2.685348000  | 3.855650000  | -0.350670000 |
| H | -2.393257000  | 4.786425000  | 0.142059000  |
| C | 2.684903000   | 3.855481000  | 0.349949000  |
| H | 2.392630000   | 4.786105000  | -0.142959000 |
| B | -2.201380000  | -2.151646000 | -1.295157000 |
| C | -3.423337000  | 1.461583000  | -1.607508000 |
| H | -3.675720000  | 0.523730000  | -2.105218000 |
| C | -2.425869000  | 3.670109000  | -1.712342000 |
| H | -1.931034000  | 4.456964000  | -2.287368000 |
| B | 2.201478000   | -2.151486000 | 1.295476000  |
| C | -2.791660000  | 2.472910000  | -2.337277000 |
| H | -2.577484000  | 2.321134000  | -3.398100000 |
| C | 6.319778000   | 0.402090000  | -0.351914000 |
| C | 7.243458000   | 0.566834000  | -1.395736000 |
| H | 6.871699000   | 0.704636000  | -2.413448000 |
| C | 6.781723000   | 0.228947000  | 0.963760000  |
| H | 6.078952000   | 0.108701000  | 1.791946000  |
| C | 9.070941000   | 0.382894000  | 0.183886000  |
| H | 10.143489000  | 0.375392000  | 0.394045000  |
| C | 8.153320000   | 0.219265000  | 1.228415000  |
| H | 8.507166000   | 0.085386000  | 2.253568000  |

|   |             |             |              |
|---|-------------|-------------|--------------|
| C | 8.615497000 | 0.557353000 | -1.126376000 |
| H | 9.330280000 | 0.686884000 | -1.942975000 |

---

Compound **6**

---

|   |              |              |              |
|---|--------------|--------------|--------------|
| P | -3.830326000 | 0.204224000  | -0.638205000 |
| S | -2.376802000 | 1.418092000  | -1.206842000 |
| P | 3.927399000  | -0.141485000 | -0.711361000 |
| S | 2.751490000  | -1.505136000 | -1.527530000 |
| F | -2.097812000 | 0.589495000  | 4.060093000  |
| F | 3.022283000  | -2.708428000 | 1.942555000  |
| F | 2.189304000  | -1.613181000 | 3.768482000  |
| F | -2.899108000 | 2.081626000  | 2.522811000  |
| N | 0.699779000  | -1.985476000 | 1.921190000  |
| N | -0.579570000 | 1.376582000  | 2.371798000  |
| N | -2.460977000 | -0.174896000 | 1.792607000  |
| N | 2.576008000  | -0.340818000 | 1.747662000  |
| C | -1.917640000 | -2.504259000 | 1.223722000  |
| H | -2.940917000 | -2.732192000 | 0.930071000  |
| C | -3.779616000 | -0.207935000 | 1.217934000  |
| H | -4.376952000 | 0.580034000  | 1.692159000  |
| H | -4.298431000 | -1.167303000 | 1.377664000  |
| C | -0.958700000 | -3.506841000 | 1.179599000  |
| H | -1.224745000 | -4.516738000 | 0.865046000  |
| C | -1.576103000 | -1.201912000 | 1.656266000  |
| C | 0.352515000  | -3.225921000 | 1.551025000  |

|   |              |              |              |
|---|--------------|--------------|--------------|
| H | 1.149057000  | -3.967891000 | 1.552451000  |
| C | -0.195546000 | -0.965178000 | 1.958021000  |
| C | -5.522021000 | 0.887017000  | -0.886014000 |
| C | -3.825146000 | -1.412548000 | -1.532046000 |
| C | -0.228130000 | 2.669977000  | 2.352872000  |
| H | -1.024057000 | 3.386551000  | 2.547775000  |
| C | 0.315095000  | 0.381434000  | 2.139734000  |
| C | 3.889963000  | -0.159800000 | 1.184891000  |
| H | 4.507868000  | -1.024529000 | 1.458925000  |
| H | 4.395632000  | 0.746028000  | 1.556262000  |
| C | 1.086608000  | 3.037998000  | 2.085175000  |
| H | 1.356573000  | 4.094482000  | 2.064175000  |
| C | -2.729034000 | -1.746002000 | -2.340137000 |
| H | -1.906986000 | -1.033672000 | -2.442046000 |
| C | 1.695889000  | 0.688745000  | 1.908969000  |
| C | 3.498299000  | 1.576932000  | -1.231504000 |
| C | -5.721312000 | 1.806293000  | -1.928427000 |
| H | -4.869955000 | 2.111975000  | -2.541050000 |
| C | 2.211402000  | 1.832017000  | -1.729727000 |
| H | 1.500850000  | 1.007970000  | -1.826475000 |
| C | -4.891257000 | -2.320185000 | -1.401952000 |
| H | -5.766806000 | -2.072424000 | -0.797244000 |
| C | 2.042362000  | 2.058441000  | 1.856780000  |
| H | 3.067766000  | 2.354012000  | 1.642857000  |



|   |              |              |              |
|---|--------------|--------------|--------------|
| C | -6.990564000 | 2.338891000  | -2.165486000 |
| H | -7.133701000 | 3.053843000  | -2.979490000 |
| C | -4.850374000 | -3.549862000 | -2.064817000 |
| H | -5.684207000 | -4.248624000 | -1.961054000 |
| C | 4.419565000  | 2.633183000  | -1.122038000 |
| H | 5.434226000  | 2.452974000  | -0.760378000 |
| C | 1.844812000  | 3.129215000  | -2.098661000 |
| H | 0.838239000  | 3.316902000  | -2.480119000 |
| C | -6.611123000 | 0.517699000  | -0.076756000 |
| H | -6.489772000 | -0.185132000 | 0.750246000  |
| C | -3.751014000 | -3.880107000 | -2.865626000 |
| H | -3.722920000 | -4.840763000 | -3.386014000 |
| C | -8.071520000 | 1.965940000  | -1.359713000 |
| H | -9.063039000 | 2.387590000  | -1.542447000 |
| C | -2.693576000 | -2.975963000 | -3.003996000 |
| H | -1.834943000 | -3.226424000 | -3.631861000 |
| C | 2.760932000  | 4.179109000  | -1.980393000 |
| H | 2.474570000  | 5.192412000  | -2.273278000 |
| C | -7.879109000 | 1.057870000  | -0.314588000 |
| H | -8.717356000 | 0.768593000  | 0.323918000  |
| C | 4.049103000  | 3.928555000  | -1.494622000 |
| H | 4.773184000  | 4.743035000  | -1.412477000 |
| B | -2.087358000 | 0.981223000  | 2.720815000  |
| B | 2.203468000  | -1.686267000 | 2.374812000  |

|   |             |              |              |
|---|-------------|--------------|--------------|
| C | 5.713743000 | -0.356523000 | -1.102855000 |
| C | 6.056665000 | -0.990800000 | -2.307868000 |
| H | 5.261985000 | -1.356154000 | -2.962411000 |
| C | 7.397828000 | -1.169981000 | -2.654253000 |
| H | 7.652287000 | -1.664219000 | -3.595098000 |
| C | 8.410527000 | -0.727135000 | -1.796885000 |
| H | 9.459672000 | -0.872889000 | -2.065904000 |
| C | 6.735978000 | 0.083748000  | -0.242814000 |
| H | 6.506041000 | 0.571010000  | 0.706769000  |
| C | 8.077621000 | -0.104065000 | -0.590693000 |
| H | 8.863787000 | 0.236760000  | 0.087375000  |

---

Compound **6**·CH<sub>2</sub>Cl<sub>2</sub>

---

|   |              |              |              |
|---|--------------|--------------|--------------|
| P | -4.146776000 | 0.066360000  | -0.276260000 |
| S | -2.734832000 | 0.488609000  | -1.595698000 |
| P | 4.220740000  | 0.066279000  | -0.553144000 |
| S | 2.999839000  | 0.668626000  | -1.996621000 |
| F | 2.235269000  | -3.497389000 | 2.250712000  |
| F | -2.124379000 | -4.478184000 | 0.306779000  |
| F | -3.061159000 | -3.364442000 | -1.457080000 |
| F | 3.063324000  | -1.410267000 | 2.674958000  |
| N | -2.542513000 | -2.104711000 | 0.530947000  |
| N | -0.716302000 | -2.990307000 | -0.946537000 |
| N | 2.518964000  | -1.963409000 | 0.394649000  |
| N | 0.713794000  | -1.641564000 | 2.100952000  |

|   |              |              |              |
|---|--------------|--------------|--------------|
| C | -1.609261000 | -1.666529000 | 1.419097000  |
| C | -3.901190000 | -1.632845000 | 0.545427000  |
| H | -4.336764000 | -1.598062000 | 1.557798000  |
| H | -4.503423000 | -2.322071000 | -0.057943000 |
| C | -1.900710000 | -0.905463000 | 2.574729000  |
| H | -2.922578000 | -0.589645000 | 2.778223000  |
| C | -3.335469000 | 2.325676000  | 1.195185000  |
| H | -2.534790000 | 2.396890000  | 0.456447000  |
| C | -5.839546000 | -0.030003000 | -0.993763000 |
| C | -0.893598000 | -0.560462000 | 3.466730000  |
| H | -1.121008000 | 0.010252000  | 4.367971000  |
| C | -0.228839000 | -1.977101000 | 1.182512000  |
| C | -4.437282000 | 3.159953000  | 3.186932000  |
| H | -4.500202000 | 3.887678000  | 3.999899000  |
| C | 1.585062000  | -2.365043000 | -0.515784000 |
| C | -6.124859000 | 0.741337000  | -2.131492000 |
| H | -5.333257000 | 1.346810000  | -2.579002000 |
| C | -4.280144000 | 1.295058000  | 1.095816000  |
| C | -6.849089000 | -0.833929000 | -0.435570000 |
| H | -6.657430000 | -1.456226000 | 0.441270000  |
| C | 1.861413000  | -2.666028000 | -1.871629000 |
| H | 2.860544000  | -2.512591000 | -2.272985000 |
| C | 0.222744000  | -2.500374000 | -0.093158000 |
| C | -0.428803000 | -3.310684000 | -2.214429000 |

|   |              |              |              |
|---|--------------|--------------|--------------|
| H | -1.253958000 | -3.693158000 | -2.812641000 |
| C | 3.889302000  | -1.696677000 | 0.024327000  |
| H | 4.254966000  | -2.360315000 | -0.774657000 |
| H | 4.522955000  | -1.861670000 | 0.905337000  |
| C | 0.862591000  | -3.141746000 | -2.706566000 |
| H | 1.078890000  | -3.388305000 | -3.746787000 |
| C | -5.383890000 | 2.133273000  | 3.091763000  |
| H | -6.188763000 | 2.058123000  | 3.827100000  |
| C | 0.414748000  | -0.958661000 | 3.217537000  |
| H | 1.247417000  | -0.741367000 | 3.884028000  |
| C | -7.402521000 | 0.718129000  | -2.695687000 |
| H | -7.613247000 | 1.321787000  | -3.581898000 |
| C | -8.404810000 | -0.079981000 | -2.134399000 |
| H | -9.402508000 | -0.101271000 | -2.579802000 |
| C | 6.407026000  | 0.890504000  | -2.086165000 |
| H | 5.674923000  | 1.549893000  | -2.558121000 |
| C | 3.059486000  | 1.984962000  | 1.130847000  |
| H | 2.284512000  | 2.042362000  | 0.364979000  |
| C | -3.416555000 | 3.255132000  | 2.236541000  |
| H | -2.676600000 | 4.056826000  | 2.298929000  |
| C | 5.061086000  | 1.855907000  | 3.079507000  |
| H | 5.848066000  | 1.806649000  | 3.836076000  |
| C | 3.971404000  | 2.716754000  | 3.253112000  |
| H | 3.905670000  | 3.341787000  | 4.147381000  |

|    |              |              |              |
|----|--------------|--------------|--------------|
| C  | 2.972667000  | 2.780015000  | 2.277567000  |
| H  | 2.121548000  | 3.454304000  | 2.398940000  |
| C  | -5.309955000 | 1.205484000  | 2.049310000  |
| H  | -6.070040000 | 0.423552000  | 1.981298000  |
| C  | 4.147241000  | 1.119046000  | 0.954627000  |
| B  | -2.185555000 | -3.270893000 | -0.391553000 |
| C  | 6.923723000  | -0.855733000 | -0.484593000 |
| H  | 6.632502000  | -1.555603000 | 0.300968000  |
| C  | -8.125451000 | -0.857186000 | -1.006550000 |
| H  | -8.901396000 | -1.489505000 | -0.568343000 |
| C  | 5.151010000  | 1.059444000  | 1.935997000  |
| H  | 6.013550000  | 0.401049000  | 1.814474000  |
| C  | 8.256096000  | -0.846032000 | -0.909900000 |
| H  | 8.972984000  | -1.532035000 | -0.452290000 |
| C  | 5.988229000  | 0.017520000  | -1.068829000 |
| C  | 7.740205000  | 0.901464000  | -2.502325000 |
| H  | 8.054213000  | 1.586895000  | -3.293365000 |
| B  | 2.207912000  | -2.152963000 | 1.879581000  |
| C  | 8.667091000  | 0.033684000  | -1.915393000 |
| H  | 9.708890000  | 0.039071000  | -2.245411000 |
| Cl | -0.043075000 | 4.518434000  | -3.115474000 |
| Cl | -0.031308000 | 4.002129000  | -0.178514000 |
| C  | -0.010574000 | 3.281770000  | -1.827206000 |
| H  | 0.912417000  | 2.699349000  | -1.923636000 |

|   |              |             |              |
|---|--------------|-------------|--------------|
| H | -0.901521000 | 2.651595000 | -1.921552000 |
|---|--------------|-------------|--------------|

---

Compound 7

---

|    |             |              |              |
|----|-------------|--------------|--------------|
| Se | 3.181565000 | -1.647760000 | -1.878588000 |
|----|-------------|--------------|--------------|

|    |              |             |              |
|----|--------------|-------------|--------------|
| Se | -5.177366000 | 2.645467000 | -0.498530000 |
|----|--------------|-------------|--------------|

|   |             |              |              |
|---|-------------|--------------|--------------|
| P | 4.228995000 | -0.360112000 | -0.520688000 |
|---|-------------|--------------|--------------|

|   |              |             |              |
|---|--------------|-------------|--------------|
| P | -4.510689000 | 0.606941000 | -0.385416000 |
|---|--------------|-------------|--------------|

|   |             |             |             |
|---|-------------|-------------|-------------|
| F | 3.044770000 | 1.797350000 | 2.293683000 |
|---|-------------|-------------|-------------|

|   |             |             |             |
|---|-------------|-------------|-------------|
| F | 2.088091000 | 0.456509000 | 3.877624000 |
|---|-------------|-------------|-------------|

|   |              |              |             |
|---|--------------|--------------|-------------|
| F | -3.207433000 | -2.546699000 | 1.573866000 |
|---|--------------|--------------|-------------|

|   |              |              |             |
|---|--------------|--------------|-------------|
| F | -2.441899000 | -1.690473000 | 3.550925000 |
|---|--------------|--------------|-------------|

|   |             |             |             |
|---|-------------|-------------|-------------|
| N | 0.680717000 | 1.264894000 | 2.106523000 |
|---|-------------|-------------|-------------|

|   |              |              |             |
|---|--------------|--------------|-------------|
| N | -2.618040000 | -0.217327000 | 1.631378000 |
|---|--------------|--------------|-------------|

|   |              |              |             |
|---|--------------|--------------|-------------|
| N | -0.851466000 | -2.007715000 | 1.770826000 |
|---|--------------|--------------|-------------|

|   |             |              |             |
|---|-------------|--------------|-------------|
| N | 2.449587000 | -0.451021000 | 1.660443000 |
|---|-------------|--------------|-------------|

|   |              |             |             |
|---|--------------|-------------|-------------|
| C | -0.857916000 | 3.035861000 | 1.769225000 |
|---|--------------|-------------|-------------|

|   |              |             |             |
|---|--------------|-------------|-------------|
| H | -1.047182000 | 4.107527000 | 1.694833000 |
|---|--------------|-------------|-------------|

|   |              |             |             |
|---|--------------|-------------|-------------|
| C | -1.647505000 | 0.734887000 | 1.721811000 |
|---|--------------|-------------|-------------|

|   |             |              |              |
|---|-------------|--------------|--------------|
| C | 8.847587000 | -0.843033000 | -0.820685000 |
|---|-------------|--------------|--------------|

|   |             |              |              |
|---|-------------|--------------|--------------|
| H | 9.930883000 | -0.959063000 | -0.905750000 |
|---|-------------|--------------|--------------|

|   |             |             |             |
|---|-------------|-------------|-------------|
| C | 0.427343000 | 2.581247000 | 2.042196000 |
|---|-------------|-------------|-------------|

|   |             |             |             |
|---|-------------|-------------|-------------|
| H | 1.277212000 | 3.241246000 | 2.206393000 |
|---|-------------|-------------|-------------|

|   |             |             |              |
|---|-------------|-------------|--------------|
| C | 2.628676000 | 1.783122000 | -1.358638000 |
|---|-------------|-------------|--------------|

|   |             |             |              |
|---|-------------|-------------|--------------|
| H | 1.930065000 | 1.002403000 | -1.667294000 |
|---|-------------|-------------|--------------|

|   |             |             |              |
|---|-------------|-------------|--------------|
| C | 3.217260000 | 4.126321000 | -1.169109000 |
|---|-------------|-------------|--------------|

|   |              |              |              |
|---|--------------|--------------|--------------|
| H | 2.968198000  | 5.180068000  | -1.318011000 |
| C | -1.452477000 | 0.830907000  | -3.131401000 |
| H | -1.032984000 | 1.588754000  | -3.797676000 |
| C | 6.061057000  | -0.549595000 | -0.599533000 |
| C | 8.022768000  | -1.124346000 | -1.914798000 |
| H | 8.458355000  | -1.461197000 | -2.858646000 |
| C | -0.287777000 | 0.329903000  | 1.920092000  |
| C | 4.773787000  | 2.424114000  | -0.424636000 |
| H | 5.742178000  | 2.164915000  | 0.007064000  |
| C | 4.450808000  | 3.770097000  | -0.614359000 |
| H | 5.168969000  | 4.542936000  | -0.329673000 |
| C | 2.307214000  | 3.131196000  | -1.539549000 |
| H | 1.343939000  | 3.402546000  | -1.978518000 |
| C | 0.717901000  | -3.699008000 | 1.219679000  |
| H | 0.918014000  | -4.746078000 | 0.989200000  |
| C | 8.281859000  | -0.418194000 | 0.384578000  |
| H | 8.918811000  | -0.201659000 | 1.245548000  |
| C | -0.583083000 | -3.293292000 | 1.499487000  |
| H | -1.432524000 | -3.974009000 | 1.509485000  |
| C | 3.862014000  | 1.422391000  | -0.795319000 |
| C | 0.122012000  | -1.056825000 | 1.797438000  |
| C | -1.892224000 | 2.123770000  | 1.605734000  |
| H | -2.893632000 | 2.488768000  | 1.371447000  |
| C | -6.946977000 | -0.689503000 | 0.080986000  |

|   |              |              |              |
|---|--------------|--------------|--------------|
| H | -6.975560000 | -0.106955000 | 1.005389000  |
| C | 6.895925000  | -0.268214000 | 0.497753000  |
| H | 6.486151000  | 0.068188000  | 1.451410000  |
| C | 1.489696000  | -1.416488000 | 1.559774000  |
| C | -5.856633000 | -0.575393000 | -0.800608000 |
| C | 1.746355000  | -2.769650000 | 1.235847000  |
| H | 2.756313000  | -3.089290000 | 0.989638000  |
| C | -5.866010000 | -1.299468000 | -2.002950000 |
| H | -5.037144000 | -1.212285000 | -2.707323000 |
| C | -0.898840000 | -0.452190000 | -3.089928000 |
| H | -0.038311000 | -0.698872000 | -3.716249000 |
| C | -8.014830000 | -1.534411000 | -0.225511000 |
| H | -8.853448000 | -1.620020000 | 0.469716000  |
| C | -3.995783000 | 0.140356000  | 1.399696000  |
| H | -4.321200000 | 0.998314000  | 2.009245000  |
| H | -4.619629000 | -0.721788000 | 1.662382000  |
| C | 6.637634000  | -0.984233000 | -1.804376000 |
| H | 5.989620000  | -1.225283000 | -2.650420000 |
| C | -2.544445000 | 1.150200000  | -2.317989000 |
| H | -2.980762000 | 2.152134000  | -2.336834000 |
| C | -6.942575000 | -2.138939000 | -2.308687000 |
| H | -6.939805000 | -2.697927000 | -3.247683000 |
| C | 3.827735000  | -0.682111000 | 1.295399000  |
| H | 4.174783000  | -1.703939000 | 1.514944000  |



|   |              |              |              |
|---|--------------|--------------|--------------|
| H | 4.451146000  | 0.011325000  | 1.873122000  |
| C | -8.014463000 | -2.262064000 | -1.421092000 |
| H | -8.852642000 | -2.920713000 | -1.661507000 |
| C | -2.539827000 | -1.112846000 | -1.431719000 |
| H | -2.962501000 | -1.879437000 | -0.779610000 |
| C | -1.444674000 | -1.422543000 | -2.241054000 |
| H | -1.011699000 | -2.424932000 | -2.206092000 |
| C | -3.092761000 | 0.181315000  | -1.466335000 |
| B | -2.348640000 | -1.624035000 | 2.162572000  |
| B | 2.139980000  | 0.775603000  | 2.520921000  |

---

## References

- 1 O. V. Dolomanov, L. J. Bourhis, R. J. Gildea, J. A. K. Howard and H. Puschmann, *J. Appl. Cryst.*, 2009, **42**, 339-341.
- 2 G. M. Sheldrick, *Acta Crystallogr., Sect. A: Found. Crystallogr.*, 2015, **71**, 3-8.
- 3 G. Sheldrick, *Acta Crystallogr., Sect. C: Struct. Chem.*, 2015, **71**, 3-8.
- 4 A. Spek, *J. Appl. Crystallography.*, 2003, **36**, 7-13.
- 5 M. J. Frisch, G. W. Trucks, H. B. Schlegel, G. E. Scuseria, M. A. Robb, J. R. Cheeseman, G. Scalmani, V. Barone, B. Mennucci, G. A. Petersson, H. Nakatsuji, M. Caricato, X. Li, H. P. Hratchian, A. F. Izmaylov, J. Bloino, G. Zheng, J. L. Sonnenberg, M. Hada, M. Ehara, K. Toyota, R. Fukuda, J. Hasegawa, M. Ishida, T. Nakajima, Y. Honda, O. Kitao, H. Nakai, T. Vreven, J. A. Montgomery Jr., J. E. Peralta, F. Ogliaro, M. Bearpark, J. J. Heyd, E. Brothers, K. N. Kudin, V. N. Staroverov, T. Keith, R. Kobayashi, J. Normand, K. Raghavachari, A. Rendell, J. C. Burant, S. S. Iyengar, J. Tomasi, M. Cossi, N. Rega, J. M. Millam, M. Klene, J. E. Knox, J. B. Cross, V. Bakken, C. Adamo, J. Jaramillo, R. Gomperts, R. E. Stratmann, O. Yazyev, A. J. Austin, R. Cammi, C. Pomelli, J. W. Ochterski, R. L. Martin, K. Morokuma, V. G. Zakrzewski, G. A. Voth, P. Salvador, J. J. Dannenberg, S. Dapprich, A. D. Daniels, O. Farkas, J. B. Foresman, J. V. Ortiz, J.

- Cioslowski and D. J. Fox, *Gaussian 09*, revision D.01, Gaussian, Inc., Wallingford, CT, 2013.
- 6 R. Zhao, C. Dou, Z. Xie, J. Liu and L. Wang, *Angew. Chem. Int. Ed.*, 2016, **55**, 5313-5317.
  - 7 A. Schäfer, C. Huber and R. Ahlrichs, *J. Chem. Phys.*, 1994, **100**, 5829-5835.
  - 8 A. Schäfer, H. Horn and R. Ahlrichs, *J. Chem. Phys.*, 1992, **97**, 2571-2577.
